# Amacrine cells shape retinal functions while dynamically preserving circuits for colour vision

Xinwei Wang<sup>1§</sup>, Paul A Roberts<sup>1</sup>, Takeshi Yoshimatsu<sup>1</sup>, Leon Lagnado<sup>1\*§</sup> and Tom Baden<sup>1,2\*§</sup>

**SUMMARY.** In vertebrate vision, the feature extracting circuits of the inner retina are driven by heavily pre-processed photoreceptor signals. For example, in larval zebrafish, outer retinal circuits serve to split “colour” from “greyscale” information across their four ancestral cone-photoreceptor types. How then can the inner retina simultaneously preserve such incoming spectral information despite the need to combine cone-signals to shape new greyscale functions?

To address this question, we imaged light-driven signals from the axon terminals of retinal bipolar cells in the presence and pharmacological absence of inhibition from amacrine cells. Surprisingly, this manipulation had no net effect on the inner retinal representation of colour-opponency, despite profound impacts on all tested greyscale functions such as the gain and kinetics of bipolar cell light responses. This ‘dynamic balance’ was achieved by amacrine cells driving opponency in some bipolar cells, while at the same time suppressing pre-existing opponency in others, such that the net change across the network was essentially zero. To do so, amacrine cells near-exclusively leveraged the On-channel, and correspondingly, a direct *in vivo* survey of amacrine cell functions revealed that all their colour-opponent responses were located in the On-layer. In contrast, Off-stratifying amacrine cells were largely achromatic. We conclude that complex interactions within the inner retina that underlie greyscale visual processing tasks are intricately balanced via the On-channel to not notably alter the pre-existing population representation of colour information.

---

1, School of Life Sciences, University of Sussex, Biology Road, BN1 9QG, Brighton, UK; 2, Institute of Ophthalmic Research, University of Tübingen, Elfriede-Aulhorn-Strasse 7, 72076, Tübingen, Germany.

\*Equal contribution, §Correspondence to [w24@sussex.ac.uk](mailto:w24@sussex.ac.uk) (XW), [l.lagnado@sussex.ac.uk](mailto:l.lagnado@sussex.ac.uk) (LL), [t.baden@sussex.ac.uk](mailto:t.baden@sussex.ac.uk) (TB).

**Twitter:** @XinweiWang1017 (XW), @PAR\_EyeMath (PAR), @TaYoshimatsu (TY), @Neonsynapse (LL), @NeuroFishh (TB)

**Acknowledgements.** We thank Thomas Euler for critical feedback. The authors would also like to acknowledge support from the FENS-Kavli Network of Excellence and the EMBO YIP. Funding was provided by the Wellcome Trust (Investigator Award in Science 220277/Z20/Z to TB and 102905/Z/13/Z to LL), the European Research Council (ERC-StG “NeuroVisEco” 677687 to TB), UKRI (BBSRC, BB/R014817/1 to TB), the Leverhulme Trust (PLP-2017-005 and RPG-2021-026 to TB) and the Lister Institute for Preventive Medicine (to TB). This research was funded in whole, or in part, by the Wellcome Trust [220277/Z20/Z and 102905/Z/13/Z to LL]. **For the purpose of Open Access, the authors have applied a CC BY public copyright licence to any Author Accepted Manuscript version arising from this submission.**

**Author contributions.** Conceptualization, XW, LL, TB; Methodology, XW, PAR, TY; Investigation, XW, PAR; Data Curation, XW, TB; Writing – Original Draft, TB; Writing – Review & Editing, XW, PAR, TY, LL, TB; Visualization, XW, TB; Supervision, LL, TB; Project Administration, LL, TB; Funding Acquisition, LL, TB.

**Declaration of Interests.** The authors declare no conflict of interest

51 **INTRODUCTION.** Animal eyes encode patterns of light along distinct axes of  
52 variation such as space, time, and “colour”<sup>1</sup>. These axes combine signals from a  
53 shared population of photoreceptors, which poses a general question in neural  
54 circuit organisation: how can a common set of inputs be processed such that  
55 optimisation for one task does not simultaneously deteriorate function elsewhere?

56 One strategy is to implement different processing tasks using separate  
57 microcircuits that operate in parallel. Such parallel processing is fundamental to  
58 brain function<sup>2</sup>, including in the vertebrate retina<sup>3,4</sup>. Here, stimulus-response  
59 relationships become increasingly specific as the visual signal travels from  
60 photoreceptors via bipolar cells (BCs) to retinal ganglion cells (RGCs). Based on  
61 this architecture, progressive circuit optimisation for distinct tasks can then take  
62 place in different populations of inner retinal neurons. A key question then is: at  
63 what stage in the retinal circuit does specialisation for each processing task occur?  
64 Optimisation for one task may precede optimisation for others. In teleost fish, for  
65 example, substantial investment in spectral coding in the outer retina<sup>5</sup> precedes  
66 the extraction of key spatiotemporal features of the inner retina<sup>6</sup>.

67 In larval zebrafish, splitting of “colour” and “brightness” signals begins in the outer  
68 retina, where the cone-photoreceptors are modulated by horizontal cells at the first  
69 synapse in vision<sup>7</sup>: Red-cones provide an output that signals brightness and is  
70 essentially “colour”-invariant, while green-cones provide a primary “colour” output  
71 that is brightness-invariant. Further, blue and UV-cones provide secondary  
72 “colour” and brightness channels, respectively. Such efficient representation<sup>7–10</sup> of  
73 spectral information is beneficial for colour vision, but also poses a new conceptual  
74 conflict. For these representations to reach the brain, the signal must pass through  
75 the remainder of the retina, where the dense interconnectedness of inner retinal  
76 circuits<sup>11–13</sup> alter the original cone signals. However, visual circuits that are not  
77 primarily set-up to deal with spectral information are nonetheless forced to work  
78 with the heavily pre-processed spectral channels provided by the cones. Despite  
79 this conflict, distinct types of BC do represent the spectral inputs from each of the  
80 four cone-signals in isolation, alongside a plethora of other BCs that represent  
81 diverse cone-mixtures, presumably specialized for other temporal and spatial  
82 processing tasks<sup>14,15</sup>. These tasks depend crucially on microcircuits within the  
83 inner retina, where amacrine cells (ACs) modify the visual signal by inhibition  
84 through both GABA- and glycinergic transmission alongside a variety of  
85 neuromodulator functions<sup>13,16–18</sup>.

86 ACs are the most diverse yet least understood class of neurons in the retina<sup>6,19,20</sup>.  
87 In mice, transcriptomic analysis revealed 63 molecularly distinct types of ACs<sup>21</sup>,  
88 thus outnumbering their 15 types of BCs<sup>22</sup> by a factor of more than four. In  
89 zebrafish, the number of AC types is not known, however, in view of their >20  
90 anatomically defined BC types<sup>11</sup> it seems unlikely their AC diversity is lower than in  
91 mice. At a general level, ACs are thought to shape receptive field structures of  
92 BCs and RGCs<sup>13,19</sup>, modulating their dynamic range<sup>23,24</sup> and contributing to their  
93 diversity<sup>12</sup>. Accordingly, we may expect ACs to contribute to both chromatic and  
94 achromatic signalling<sup>25–27</sup>. Yet, beyond a handful of well-studied AC-circuits<sup>24,28–32</sup>,  
95 mostly in mammals, the specific functions of most AC-types across any species  
96 remains unknown.

97 To test if and how ACs contribute to inner retinal processing by zebrafish BCs, we  
98 used *in vivo* two-photon imaging to compare BC responses to a battery of visual  
99 stimuli in the presence and pharmacological absence of AC-mediated inhibition.  
100 Surprisingly, we find that the population representation of spectral contrast<sup>5,33</sup> (i.e.  
101 colour opponency) was approximately unchanged despite profound changes in  
102 other aspects of circuit function, such as the gain and kinetics of visual responses,  
103 spectral bias and the degree of synchronization between different neurons.  
104 However, this was not because opponency in individual BCs was invariant to AC-  
105 block. On the contrary: ACs both routinely abolished and generated spectral  
106 opponency at the level of individual BCs, but they did so in approximately equal  
107 measure, such that the net change across the population of BCs was essentially

108 zero. To preserve the balance between different chromatic and achromatic  
109 channels, ACs act near-exclusively through On-circuits. The notion that ACs are  
110 not primarily set up to process spectral information was further supported by a  
111 functional survey of ACs themselves: despite being highly diverse – for example in  
112 terms of kinetics and polarity - ACs were mostly non-opponent and spectrally  
113 resembled linear combinations of UV- and red-cone signals, which in zebrafish are  
114 associated with achromatic processing<sup>7</sup>. The only exception to this rule occurred  
115 for a small number of weakly colour-opponent On-stratifying ACs, in line with most  
116 AC-BC spectral processing being implemented via On-circuits.

117 We conclude that the parsing of colour information performed in the outer retina is  
118 conserved as the visual signal is transmitted to RGCs in the inner retina. The  
119 complex interactions within the inner retina that underly other visual processing  
120 tasks do not notably alter the population representation of colour information.

121

## 122 RESULTS

123 ***Bipolar cell signalling in the presence and absence of inhibition from***  
124 ***amacrine cells.*** To investigate the effects of AC-mediated inhibition on the visual  
125 signal transmitted through the inner retina of zebrafish, we combined  
126 pharmacology with two-photon (2P) *in vivo* imaging of BC synaptic terminals  
127 sparsely and randomly expressing the calcium biosensor SyGCaMP3.5 using  
128 established protocols<sup>14,34,35</sup> (Figure 1A-J, Methods). The sparse labelling was  
129 essential for observing individual terminals across experimental conditions.

130 In each experiment, we first scanned a single eye region comprising typically 20-  
131 30 individual BC terminals (Figure 1D) and presented a battery of widefield light  
132 stimuli testing basic visual processing tasks (Methods): (i) an achromatic (“white”)   
133 step of light (3 s On, 3 s Off, 100% contrast) testing response polarity and kinetics  
134 (Figure 1H); ii) a frequency modulated “chirp” centred at 50% contrast testing  
135 frequency response (Figure 1H), (iii) steps of light (2 s On, 2 s Off, 100% contrast)  
136 at four different wavelengths (‘red’: 592 nm; ‘green’: 487 nm; ‘blue’: 420 nm; ‘UV’  
137 382 nm) testing spectral sensitivity (Figure 1I) and (iv) ‘tetrachromatic binary noise’  
138 (5 mins, 6.4 Hz, 100% contrast) which allowed us to extract four ‘spectral  
139 sensitivity kernels’ per terminal to probe for spectral opponency (Figure 1J,  
140 Methods). This set of stimuli was chosen to facilitate comparison with previous  
141 work<sup>7,12,15,36,37</sup>, and to test a wide range of achromatic and spectral BC signalling  
142 properties within a limited recording time. Next, we injected a cocktail of gabazine,  
143 TPMPA, and strychnine into the eye to pharmacologically block GABA<sub>A</sub>, GABA<sub>C</sub>  
144 and glycine receptors, respectively<sup>38</sup> (Figure 1B,C, Methods), which represent the  
145 major known sources of AC-mediated inhibition in the inner retina<sup>16</sup>. We then  
146 imaged the same eye-region a second time (Figure 1F). This strategy allowed us  
147 to identify the same terminal in 40-60% of cases (Figure 1D,F, right, Methods).  
148 The remainder of non-paired terminals was also captured in both conditions and  
149 processed separately. This allowed us to directly compare the effects of AC-block  
150 on individual terminals (“paired data”), while also assessing responses across a  
151 larger population of all imaged terminals, as appropriate (“all data”).

152 In total, we recorded  $n = 14$  scan-field pairs in an equivalent number of fish,  
153 yielding a total of  $n = 182$  paired terminals amongst a total of  $n = 412$  (control) and  
154  $n = 441$  (AC-block) terminals. Because retinal regionalisation<sup>15,37,39</sup> was not a  
155 focus of this study, we sampled approximately evenly from all positions in the eye.  
156 Moreover, the location of terminals across both datasets covered the entire depth  
157 of the inner plexiform layer (IPL) and recovered the notable dip near the centre  
158 where BC terminals are less abundant<sup>15,40</sup> (Figure 1E,G), indicating that a  
159 representative fraction of all BC-terminals was captured. This approach revealed a  
160 range of effects of AC-block on BC functions.

161

162

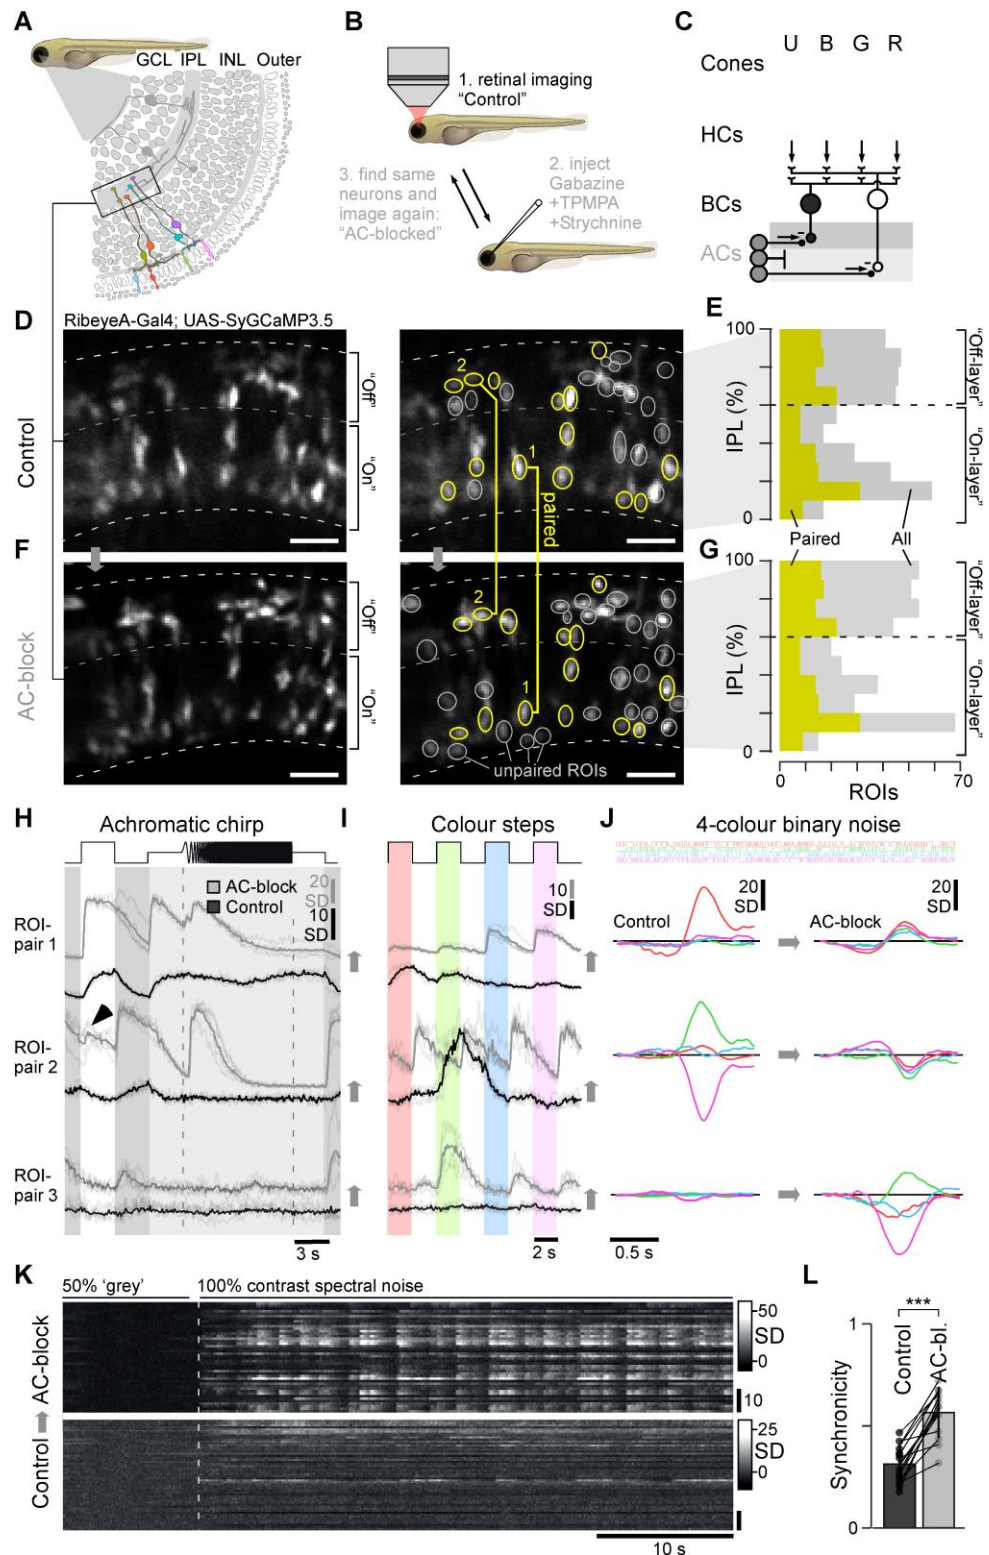

163

164

165

166

167

168

169

170

171

172

173

174

175

**Figure 1 | Recording bipolar cells before and after amacrine cell block.** **A**, Schematic cross-section of larval zebrafish retina, with recording region across the inner plexiform layer which houses the synaptic terminals of bipolar cells (BCs) indicated (based on Ref<sup>68</sup>). **B**, Outline of experimental strategy. **C**, Overview of the general circuit logic of the outer (top) and inner retina (bottom): Input is provided by four types of cone-photoreceptors: UV-cones (U, expressing SWS1 opsin), "blue"-cones (B, SWS2), "green"-cones (G, RH2) and "red"-cones (R, LWS1)<sup>5</sup>. Rods are functionally immature in larval zebrafish<sup>59,60</sup>. Cones feed into three types of Horizontal cells (HCs) which, amongst other functions<sup>61</sup>, serve to retune the cone output spectra<sup>7,62,63</sup>. This signal is differentially integrated by the dendrites >20 types of BCs<sup>11,14,15,64</sup> and propagated to their axon terminals located in the inner plexiform layer<sup>65</sup>. From here, BCs form synapses with retinal ganglion cells (RGCs, not shown) which form the optic nerve, and with amacrine cells (ACs). ACs in turn provide feedback and/or feedforward inhibition to BCs and RGCs via GABA and/or glycinergic transmission<sup>20</sup>. **D-G**, left, example scan region



176 of the inner retina showing sparse syGCaMP3.5 expression in BC synaptic terminals before (D) and  
177 again after injection of GABA<sub>A</sub>zine, TPMPA and Strychnine into the eye (F), and the same area with  
178 regions of interest (ROIs) superimposed (right); scalebars = 10  $\mu$ m. ROIs in yellow could be matched  
179 across the two experimental conditions and are henceforth considered “paired”. The remainder of  
180 unpaired terminals was also extracted and processed alongside the paired data (“all data”). The spatial  
181 distribution of all terminals processed in this way across  $n = 14$  scan fields is shown with approximate  
182 labelling of the traditional “Off” and “On” layers of the IPL. **H-J**, example responses of three pairs of BC  
183 terminals, as indicated in (D,F), to the three light stimuli tested: an achromatic chirp stimulus (H), four  
184 spectrally distinct steps of light from dark (red, green, blue, UV, as indicated, Methods) (I) and a  
185 spectral noise stimulus used to establish linear filters (kernels) at the same four wavelengths (J). In  
186 each case, the control data (black) is shown alongside the corresponding AC-block data (grey). The top  
187 two pairs correspond to the ones highlighted in (D-G), while pair 3 is taken from a different scan. **K,L**,  
188 comparison of population synchronicity during spectral noise stimulation (J). Heatmaps show the first  
189 60 s of the z-normalised responses of all terminals in control (bottom) and AC-block condition (top)  
190 taken from the same scan-field. Population synchronicity (L) was computed as in Ref<sup>42</sup>. Wilcoxon  
191 Signed-Rank test:  $p = 2.4 \times 10^{-4}$ . The black arrowhead in (H) highlights an unmasked small On-response.

192 **Changes in response amplitude.** Blocking inhibition increased the amplitude of  
193 responses to achromatic steps of light without changing the dominant response  
194 polarity (Figure 1H), consistent with role of ACs in controlling the gain of the  
195 synaptic output from BCs<sup>41</sup>. For instance, ROI-pair 1 consistently exhibited On-  
196 responses, but with a notably increased amplitude and altered time course  
197 following AC-block (grey) compared to control conditions (black). ROI-pairs 2 and  
198 3 exhibited Off-responses both during control conditions and following AC-block,  
199 again with increased amplitude and altered time-course. In the case of ROI-pair 2,  
200 AC-block also unmasked an additional low-amplitude On-response.

201 **Changes in colour coding.** ACs served to spectrally sharpen or retune  
202 ‘intrinsically broad’ responses in individual BCs. For instance, in ROI-pair 1,  
203 responses to colour steps (Figure 1I) were red-biased during control condition but  
204 responded to all four wavelengths after blocking inhibition, and this spectral  
205 broadening was also observed at the level of the kernels (Figure 1J). It appears  
206 that in this case ACs were masking an intrinsic short-wavelength response to set-  
207 up a long-wavelength biased BC. The effects on ROI-pairs 2 and 3 were opposite:  
208 ROI-pair 2 exhibited a green-UV colour-opponent response during control  
209 conditions, which was abolished following AC-block, while vice versa ROI-pair 3  
210 exhibited weak non-opponent response during control conditions but green-UV  
211 opponency upon AC-block. Accordingly, in ROI-pair 2, ACs were responsible for  
212 setting up BC-opponency, while in ROI-pair 3 ACs masked an intrinsic form of BC-  
213 opponency.

214 **Changes in signal correlations.** In mice, inhibitory networks in the inner retina  
215 decorrelate signals transmitted through BCs which reduces redundancy across the  
216 population<sup>12</sup>. We therefore compared activity across the population of BC  
217 synapses in response to stimulation with spectral noise (Figure 1K,L, cf. Figure 1J)  
218 before and after AC-block at a population level. Here, our reasoning was that the  
219 removal of inhibitory neurotransmission should not only lead to a disinhibition of  
220 BCs (leading, for example, to larger responses), but also to an increased  
221 synchrony across the population. Using a normalized synchrony measure,  $\chi(N)^{42}$ ,  
222 this is indeed what we observed (Figure 1K,L). Accordingly, like in mice<sup>12</sup>, the  
223 removal of inhibition served to decorrelate BC responses also in zebrafish.

224 In addition to the AC-block dataset, we also recorded an equivalent but  
225 independent sham control dataset ( $n = 6$  scans,  $n = 144$  paired terminals amongst  
226 a total of  $n_{\text{Control}} = 398$ ,  $n_{\text{sham}} = 378$  terminals), where we replaced the drug cocktail  
227 used to block ACs with an equivalent volume non-pharmacologically active  
228 vehicle. Sham injections had no significant effect on the functions we analysed  
229 (Supplemental Figure S1A-H, Methods). Finally, we also evaluated the effect of  
230 ‘AC-block’ on outer retinal function, using the known horizontal cell-mediated red-  
231 opponency in green-cones<sup>7</sup> as the test case. This confirmed that green cones’  
232 red-opponent responses persisted in the presence of the drug-cocktail  
233 (Supplemental Figure S1I-K).

234

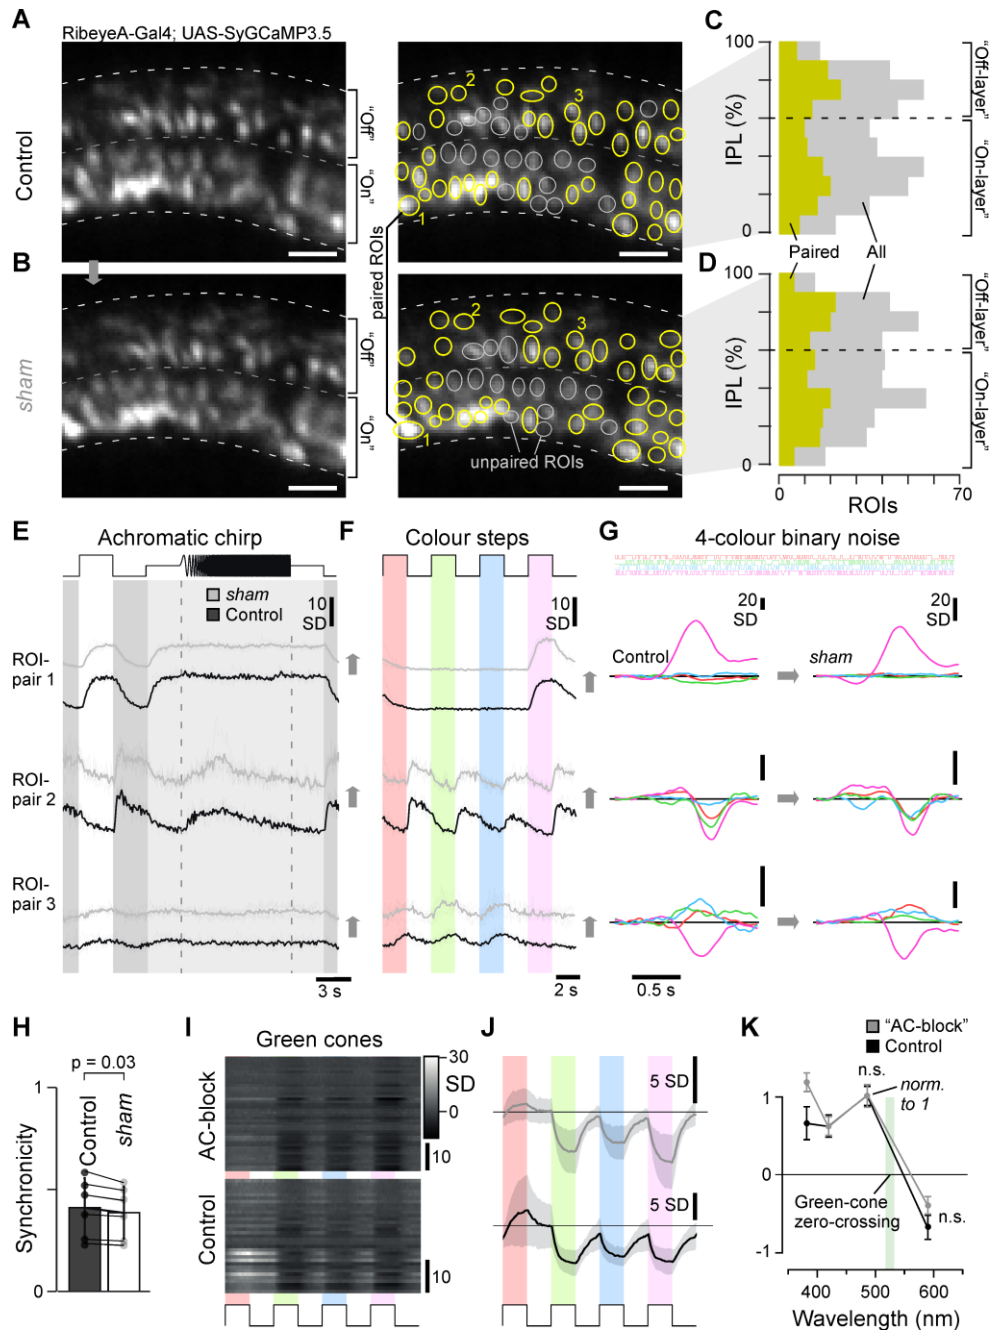

235

236

237

238

239

240

241

242

243

244

245

246

247

248

249

250

251

**Supplemental Figure S1 – related to Figure 1. A-G, as Figure 1D-J, but for an example sham-injection dataset. H, as Figure 1L, but for sham-injection datasets. Wilcoxon Signed-Rank test:  $p = 0.03$ . I-K, No effect of drug-cocktail injection as in Figure 1 on spectral opponency in green-cones. Heatmaps (I) of SyGCaMP6f responses in green-cone terminals to the four steps of light as Figure 1I (based on previously established protocols before (bottom) and after drug injection (top), the same data summarised with mean  $\pm 1$ SD shading (J) and extracted response amplitudes plotted against stimulus wavelength (K). The green shading indicates the spectral position of the green-cones' zero-crossing from Ref. Wilcoxon rank sum test,  $p = 0.87, 0.07$  for red and green responses, respectively. Note that green-cone responses continue to invert between mid- (green) and long-wavelength stimulation (red) following AC-block, indicating that cone-opponency is not affected by this manipulation.**

Below we expand these specific examples to a broader evaluation of the effects of AC-block on achromatic BC-functions and link these to different possible cone-photoreceptor systems using the spectral steps. We then evaluate the dominant AC-mediated effects on population coding of colour using the kernels.

252 **ACs attenuate BC gain and kinetics without affecting response polarity.** To  
253 evaluate the effects of AC-block on the encoding of the ‘white’ step of light, we  
254 fitted trial-averaged achromatic step-responses using a linear kinetic model  
255 following a similar approach used in recent work<sup>14</sup>. Briefly, the model used four  
256 kinetic templates to capture the dominant response waveforms across our  
257 datasets: Light-transient, Light-sustained, Dark-transient, and Dark-sustained  
258 (Figure 2A-E, Methods). This allowed simplifying the often-complex interplay of  
259 different response-components into four corresponding weights. For example, the  
260 BC shown in Figure 2A exhibited a relatively slow On-response in the control  
261 condition that was readily captured by a positively weighted Light-sustained  
262 component alone (Figure 2C, bottom). However, the same BC’s response  
263 following AC-block was kinetically more complex. Capturing this compound  
264 waveform required the additional use of a large light-transient component  
265 alongside the continued presence of the light-sustained component (Figure 2C,  
266 top). Moreover, the response decay following the light step was marginally faster  
267 than in the control condition and required the additional use of low amplitude  
268 negative dark-component weights. Accordingly, in this case the kinetic model  
269 predicted that the main effect of AC-block was the unmasking of a light-transient  
270 response, potentially with addition of a smaller suppressive dark-response. The  
271 same approach served to fit all achromatic step-responses across conditions. For  
272 example, the Off-responses shown in Figure 2D were well captured by the  
273 combination of a negative light-sustained component, alongside the unmasking of  
274 a positive dark-transient component following AC-block. Similarly, the model also  
275 captured well another BC’s On-Off response that was unmasked following AC-  
276 block (Figure 2E). Across all datasets, the model consistently captured >95% of  
277 the variance across the respective response means (Supplemental Figure S2A,B,  
278 Methods). The extracted component weights were used as the basis for all further  
279 analysis of step responses.

280 First, we automatically sorted all responses by polarity (Methods), applying a  
281 minimum component weight threshold of 3 SDs to constitute a response (Figure  
282 2F-J). Based on this criterion, the  $n = 412$  control BCs (full dataset) were sorted  
283 into  $n = 266$  (64%) non-responsive BCs,  $n = 76$  On BCs (18%) and  $n = 70$  Off BCs  
284 (17%, Figure 2F, bottom, cf. Figure 2G,H). Under control conditions, no BC was  
285 classed as On-Off. Correspondingly, the  $n = 442$  AC-block BCs were sorted into  $n = 59$   
286 non-responsive BCs (13%),  $n = 240$  On BCs (54%),  $n = 122$  Off BCs (28%),  
287 and  $n = 20$  On-Off BCs (5%, Figure 2F, top, cf. Figure 2G,H). No major changes  
288 were observed in the sham-injection dataset (Supplemental Figure 2C).  
289 Accordingly, at a population level, the removal of inhibitory inputs from ACs  
290 revealed previously unresponsive BCs, a major rebalancing of On- versus Off-  
291 signals and, unexpectedly, unmasked the presence of a small fraction of On-Off  
292 BCs. Despite this rebalancing, the anatomical distributions of different polarity BCs  
293 within the IPL were largely conserved following AC-block: Under both conditions,  
294 On- and Off-responding BCs dominated the lower- and upper part of the inner  
295 retina, respectively (Figure 2G). However, in all cases at least a small fraction of  
296 On- and Off-terminals was found outside these “traditional Off-” and “On-layers”<sup>43</sup>,  
297 respectively (see also Refs<sup>14,15</sup>). Interestingly, On-Off cells were predominately  
298 unmasked in the “Off-layer”, suggesting a closer relationship with Off- rather than  
299 On- BCs.

300 Next, we used the “paired” subset of BCs ( $n = 182$ ) to evaluate how this polarity-  
301 shift emerged at the level of individual terminals (Figure 2I). This revealed that AC-  
302 block inverted the polarity of individual terminals in only  $n = 4 / 182$  cases (2%).  
303 Instead, most terminals that exhibited light-responses during control conditions  
304 continued to exhibit the same polarity following AC-block ( $n_{\text{on}} = 43/44$ ,  $n_{\text{off}} =$   
305  $19/29$ ). The bulk of observed changes (cf. Figure 2F-H) rather stemmed from the  
306 unmasking of light responses in previously unresponsive terminals ( $n = 101/182$ ,  
307 55%). Most unmasked terminals were On (69) rather than Off (23) or OnOff (7).  
308 Accordingly, a key role of ACs in the zebrafish retina appears to be in modulating  
309 the gain of BCs’ ‘photoreceptor-inherited’ light responses, without routinely  
310 inverting their polarity. This modulation could be very powerful, masking BCs’

311  
312

photoreceptor-inherited light responses to the widefield achromatic stimulus altogether in more than half of all cases.

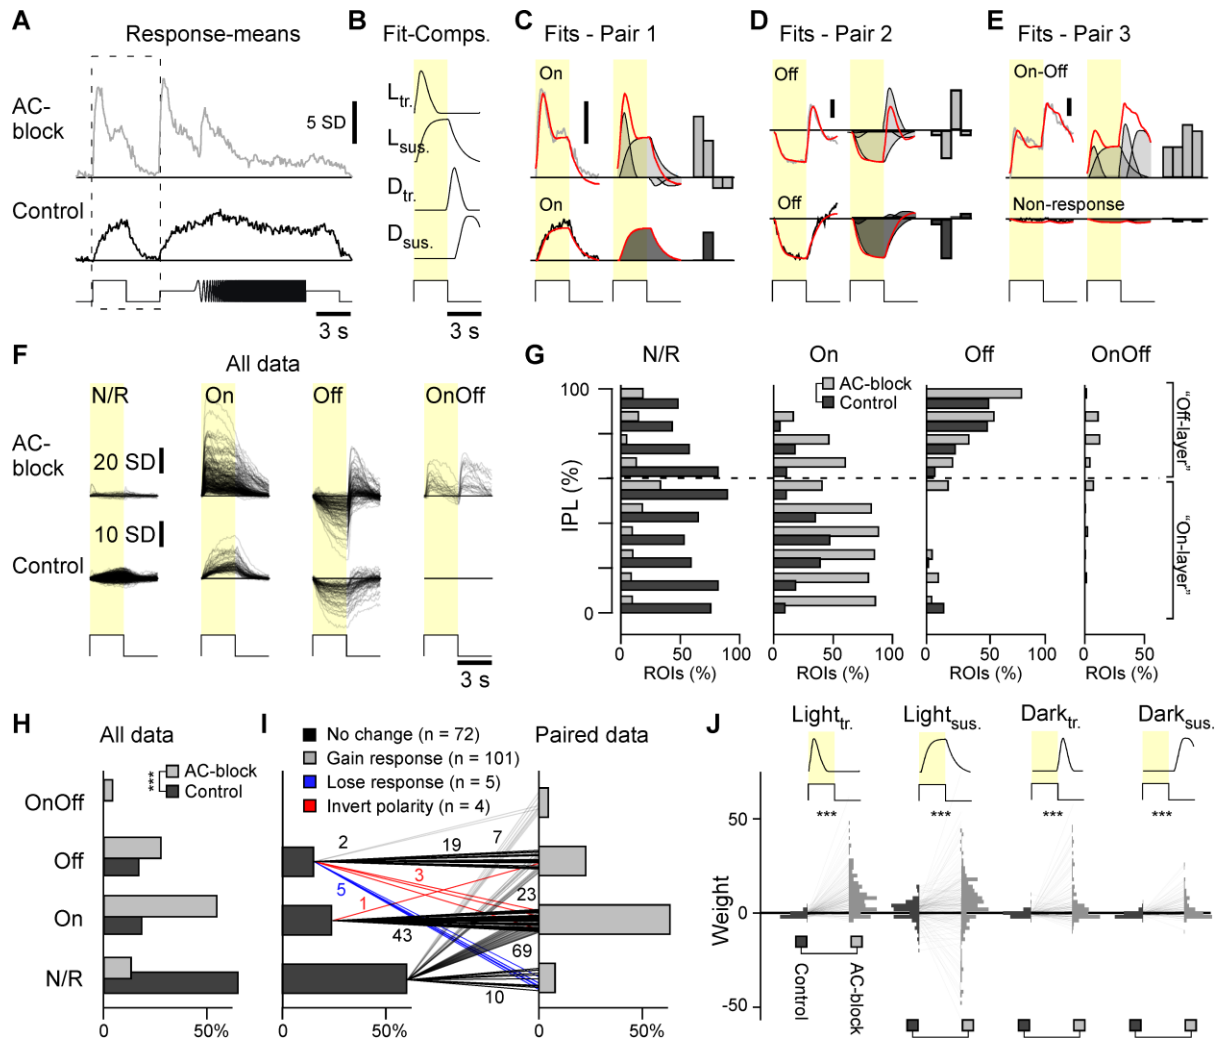

313

314 **Figure 2 – Major effects of AC-block on achromatic BC-functions.** A-E, Example responses to the ‘white’ chirp stimulus (cf.  
315 Figure 1H) and template-fitting approach (Methods). One pair of example BC terminals is shown in (A), with the stimuli  
316 illustrated under the response traces. Four kinetic templates (B) are used for fitting the response to ‘white’ step stimuli, three  
317 examples of fitting results are shown in C-E. In each graph, left panel, the black/grey traces represent single BCs’ average  
318 responses for control/drug condition, with fits in red; middle panel, the fits plotted with the four weighed templates, with  
319 corresponding weights, left to right: Light-transient, Light-sustained, Dark-transient, and Dark-sustained respectively. F-H, All  
320 BCs automatically sorted by polarity ( $n_{\text{control}} = 412$ ,  $n_{\text{AC-block}} = 441$ ). Traces from all BCs shown superimposed (F), their  
321 respective IPL positions shown in (G), and group percentages shown in (H), Chi-squared test,  $p = 5.51 \times 10^{-54}$ . I, as (H), but for  
322 the subset of paired BCs ( $n=182$  pairs), showing pairwise allocations in control (left) and AC-block conditions (right). Lines  
323 represent the pairs, with numbers of BCs indicated. Chi-square test,  $p = 4.59 \times 10^{-25}$ . J, Pairwise weight distributions for the four  
324 kinetic components (B) in control (left) and AC-block condition (right), as indicated.

325

326 To evaluate effects on BCs’ gain and kinetics following AC-block, we next  
327 analysed the pair-wise change in each of the four kinetic component weights  
328 (Figure 2J). This revealed that most changes occurred amongst light- rather than  
329 dark-components, and the weights of transient components tended to change  
330 more strongly compared to the weights of sustained components (Supplemental  
331 Figure 2D, cf. Figure 2C,D,F). Moreover, most changes were positive in sign – that  
332 is, accentuating the stimulus-driven rise in calcium signals. The only systematic  
333 exception to this rule occurred amongst a subset of light-sustained components,  
which showed an accentuated decrease instead.

334

335 Overall, our results show how ACs fundamentally shape essential achromatic  
336 circuit functions such as the gain and kinetics of BCs. We next asked if and how  
ACs shape the encoding of BCs’ spectral information.



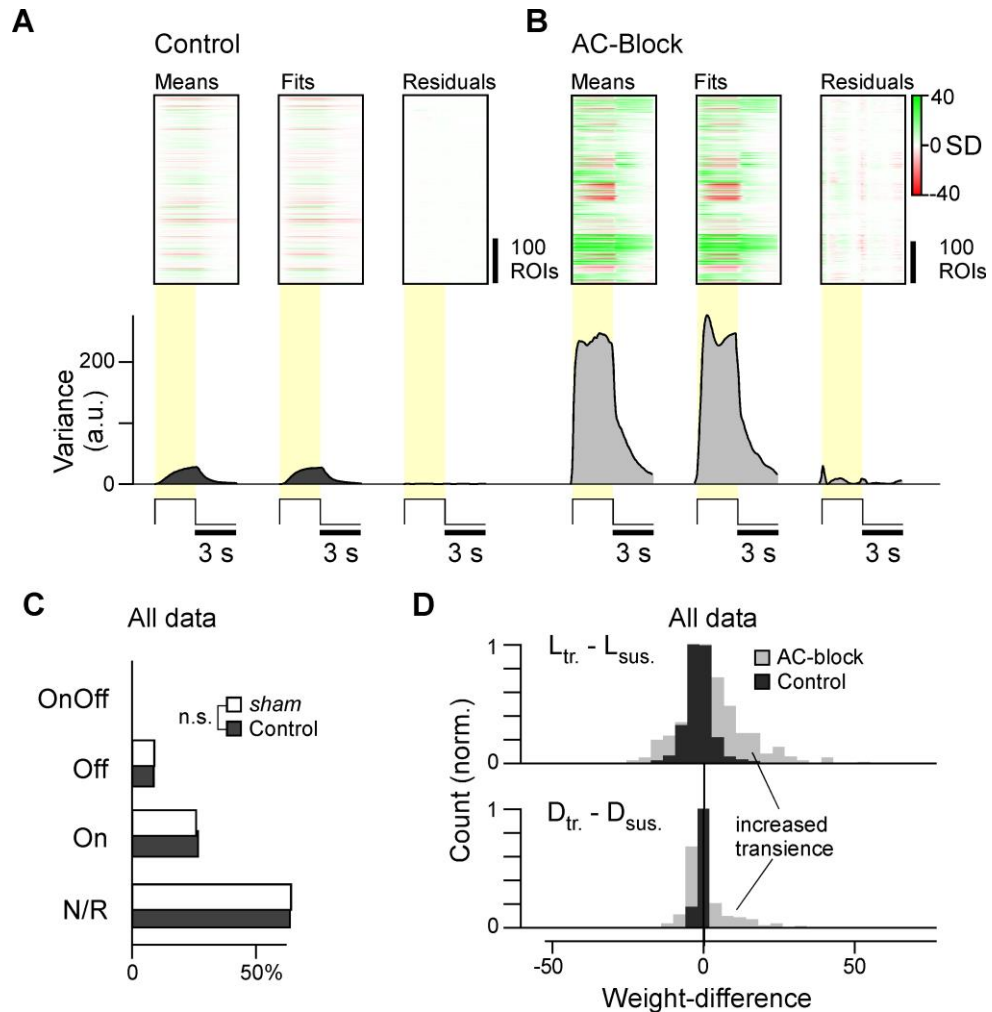

**Figure S2 – related to Figure 2. A,B.** Summary of fits for all achromatic step responses (cf. Figure 2A-E). Heatmaps show the population data in control (A) and AC-block condition (B). In each case, the first column represents all BCs’ trial-averaged achromatic step responses, followed by the corresponding fits and the residuals. In each case, the variance across a heatmap’s y-dimension, indicative of the overall signal in each dataset, is shown below (see also Ref<sup>14</sup>). **C**, as Figure 2H, but for sham-injection dataset. **D**, Paired weight differences between transient and sustained components in control and AC-block conditions as indicated (light and dark-components in top and bottom, respectively). Wilcoxon rank sum test,  $p = 1.41 \cdot 10^{-11}$  for  $L_{tr} - L_{sus.}$ ,  $p = 0.08$  for  $D_{tr} - D_{sus.}$ .

**ACs shape spectral BC-processing but preserve colour opponency.** To distinguish changes in wavelength from changes in intensity, circuits for colour vision spectrally contrast signals of different photoreceptor systems<sup>5,33</sup>. The resultant “colour opponent” neurons might be considered the fundamental ‘currency’ of colour vision. Accordingly, we next assessed the impact of AC-block on the representation of colour opponency amongst BCs.

In zebrafish, BCs represent three types of spectral opponency (Supplemental Figure 3A, see also Supplemental Figure 3B-E): “Long-“ (“red-green”), “mid-“ (“orange-blue”) and “short-“ (“yellow-UV”), with spectral zero crossings at ~523, ~483 and ~450 nm, respectively<sup>14,15</sup>. Of these, long- and mid-wavelength opponency is already encoded at the level of green- and blue-cones, respectively<sup>7</sup>. Accordingly, ACs are not categorically required to set-up these types of opponency in BCs. In contrast, short-wavelength opponency is only weakly represented in UV-cones<sup>7</sup>, but dominant amongst BCs<sup>14</sup>. Therefore, the expectation is that this short-wavelength type of opponency in BCs requires the presence of ACs.

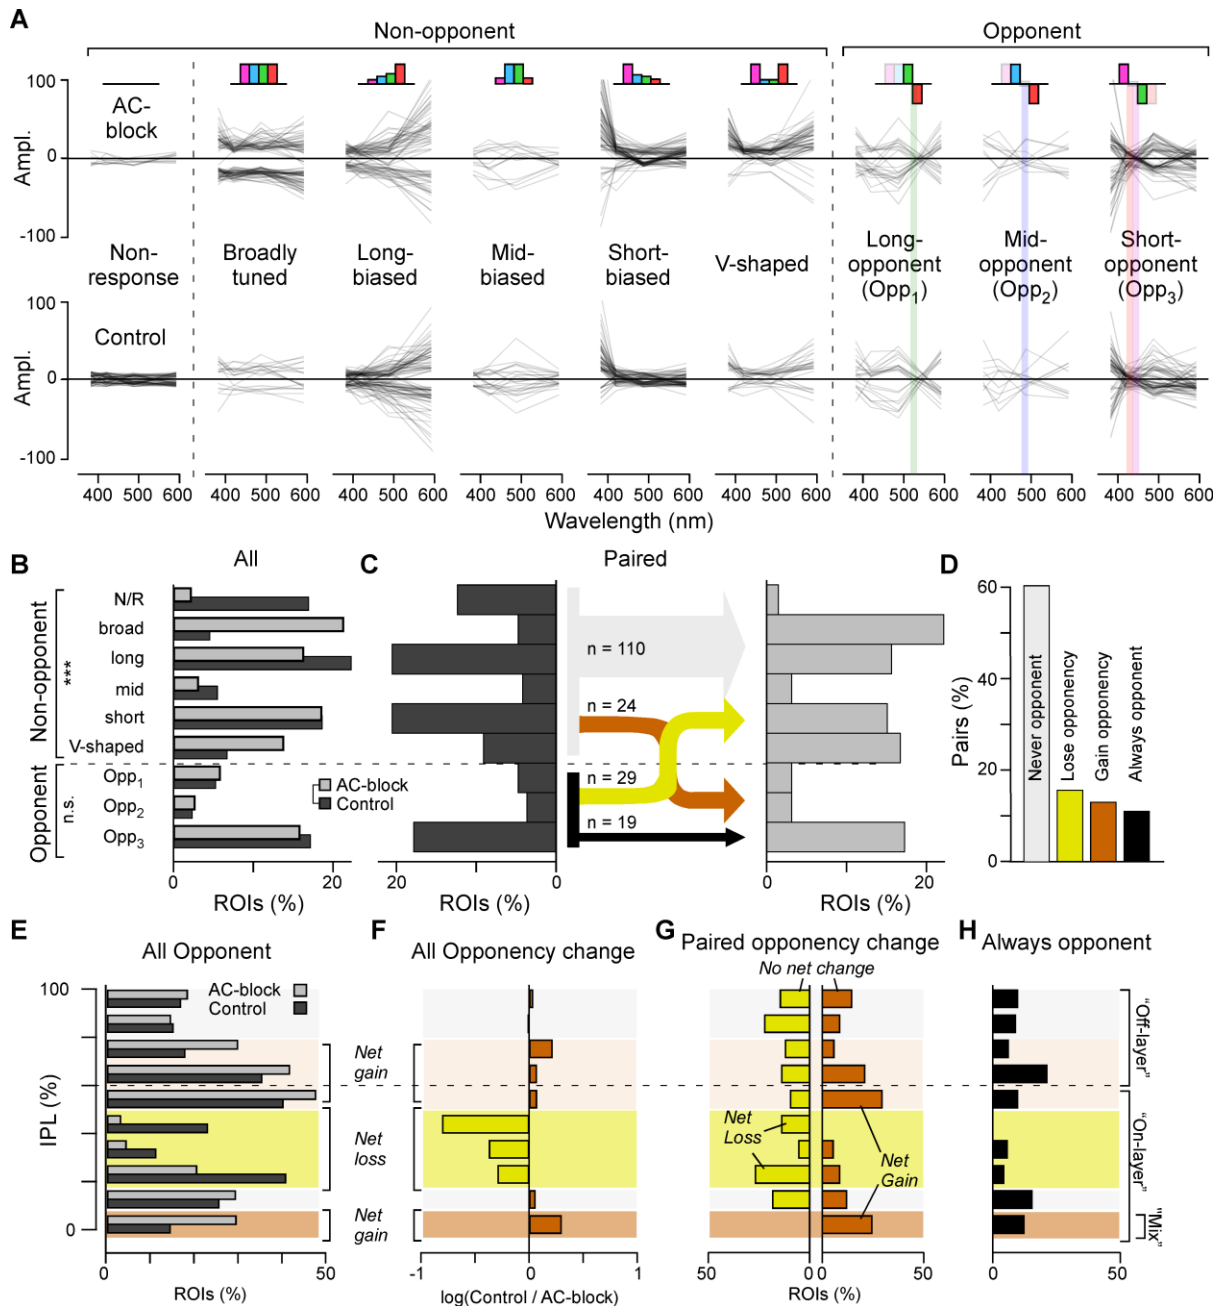

363

364 **Figure 3 – Modulation of spectral processing.** A-F, All BCs' spectral tuning functions (based on the kernels, cf. Figure 1J)  
 365 under control (bottom) and AC-block condition (top) sorted into nine groups as indicated (Methods). The shaded bars in the  
 366 three opponent groups (right) indicate their corresponding spectral zero crossings (based on Refs<sup>7,14</sup> – cf. Supplemental Figure  
 367 3A). B-D, Percentages of ROIs in each spectral group for all data (B) and paired data (C). In 'all data', black and grey bars  
 368 represent control and AC-block conditions, respectively. For simplicity, the individual 9-fold category correspondences in the  
 369 paired data are summarised into non-opponent and opponent groups, leading to four forms of correspondences between  
 370 control (left) and AC-block condition (right): always non-opponent (grey); always opponent (black); Lose opponency upon AC-  
 371 block (yellow), gain opponency upon AC-block (orange/brown). Percentages of these four groups are further summarised in  
 372 (D). Chi-squared tests: all data (B),  $p = 2.44 \times 10^{-22}$  (non-opponent group) and  $p = 0.81$  (opponent group); paired data (C),  $p =$   
 373  $3.9 \times 10^{-8}$  (non-opponent group) and  $p = 0.81$  (opponent group). E-H, Data from (A-D) summarised by IPL position with (E,F) and  
 374 (G,H) summarising all- and paired-data, respectively. IPL distributions of opponent BCs under control and AC-block condition  
 375 (E) and their relative change (F), with IPL regions with net loss (yellow) and gain of opponency (orange/brown) highlighted.  
 376 Based on paired data, IPL distribution of BCs that lose (G, left, yellow) and gain opponency (G, right, orange) and those that  
 377 are always opponent (H). Shadings behind E-H indicate approximate regions of the IPL that tended to exhibit a net loss (yellow)  
 378 or gain (orange/brown) of opponency following AC-block, or where opponency was approximately balanced (grey).

379

Surprisingly, neither of the above expectations were experimentally confirmed. Instead, and despite profound impacts of AC-block on the representation of colour opponency at the level of most individual BCs, the population representation of colour opponency amongst BCs was essentially unchanged following AC-block.

380

381

382

383 To reach this conclusion, we first automatically sorted all BC-responses in control  
 384 condition, and again following AC-block, into one of nine spectral groups, which  
 385 included non-responders, five non-opponent groups (broad, long-, mid-, short-  
 386 wavelength biased, V-shaped), and three opponent groups (long-, mid- and short-  
 387 wavelength opponent) (Methods). This revealed that the overall representation of  
 388 all nine groups remained approximately constant, in the sense that under either  
 389 condition, a substantial fraction of BC-responses fell into each spectral group  
 390 (Figure 3A). Nevertheless, in agreement with the results from the achromatic step  
 391 responses (Figures 2), the relative abundances amongst non-opponent groups did  
 392 change. Most notable was a pronounced decrease in the abundance of non-  
 393 responders (17.0% → 2.3%) alongside a marked increase in the proportion of  
 394 broadly tuned (4.6% → 21.3%) and V-shaped BCs (6.8% → 13.8%). These  
 395 changes were accompanied by more minor reductions in the proportions of long-  
 396 (22.3% → 16.3%) and mid-wavelength biased BCs (5.6% → 3.2%). However,  
 397 strikingly, the relative abundances of all three opponent groups (long: 5.3% →  
 398 5.9%; mid: 2.4% → 2.7%; short: 15.8% → 17.2%), alongside those of short-  
 399 wavelength biased BCs (18.7% → 18.6%), remained largely unchanged.  
 400 Accordingly, at a population level, and despite the major rebalancing of response  
 401 amplitudes and kinetics (Figures 1,2), the removal of AC influences had negligible  
 402 effects on population coding of colour opponency through BCs (Figure 3A,B).

403 However, remarkably, analysis of the paired-dataset (Figure 3C) revealed that this  
 404 was not because colour opponency in individual BCs was unaffected by AC-block.  
 405 On the contrary: More than half of all BCs that exhibited opponency under control  
 406 conditions lost opponency following AC-block (n = 29 of 49, 59.2%). However, at  
 407 the same time, an almost equal number of previously non-opponent BCs  
 408 replenished the population of opponent BCs (n = 24). This “switching” of opponent  
 409 BCs between conditions affected all three opponent groups: of the n = 8, 7 and 33  
 410 long-, mid- and short-wavelength opponent BCs recorded during control  
 411 conditions, respectively, only n = 2, 2 and 15 (25%, 29%, 45%) BCs, respectively,  
 412 maintained their specific opponency following AC-block. Except for a single BC  
 413 that switched from long- to short-wavelength opponency, all remaining opponent  
 414 BCs lost their opponency altogether following AC-block (Figure 3C,D). Examples  
 415 of diverse opponency-relationships between control and AC-block conditions are  
 416 presented in Figure 4.

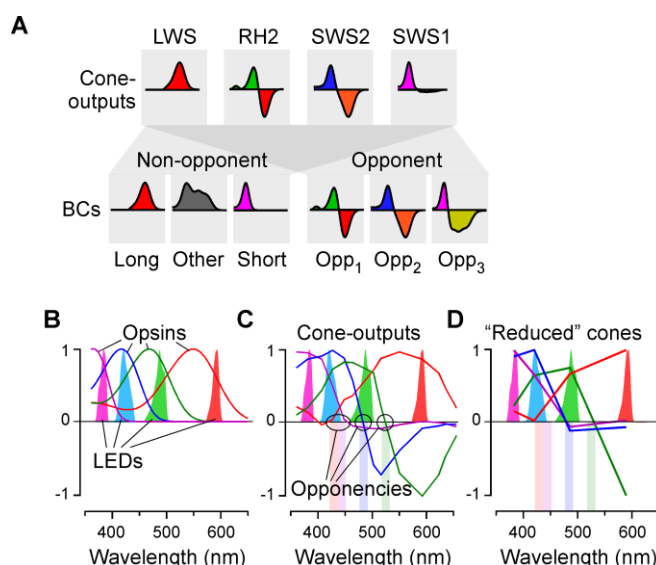

417  
 418 **Figure S3 – related to Figure 3.** A, Illustration of how cone input could build the different spectral  
 419 response types in BCs. Insets indicate approximate spectral tuning functions (amplitude y versus  
 420 wavelength x). The upper row shows the four cones<sup>7</sup>, bottom rows shows BCs<sup>14,15</sup>, divided into non-  
 421 opponent group and opponent group. B-D, Summary of known spectral tuning functions of cones and  
 422 their opponencies (based on Ref<sup>7</sup>). In each panel, the four LEDs used in the present study are shown  
 423 as solid curves (Methods). Superimposed are the spectral tuning functions of the cone opsins (B), their  
 424 in vivo spectral tuning functions with zero crossings indicated (C), and the cones' spectrally "reduced"  
 425 in vivo tunings functions as probes with the four LEDs.

426  
427  
428  
429

Unexpectedly, therefore, ACs contributed to building all three types of colour opponent responses found amongst BCs; however, at the same time, they also masked pre-existing opponency in other BCs in approximately equal measure such that the net change was essentially zero.

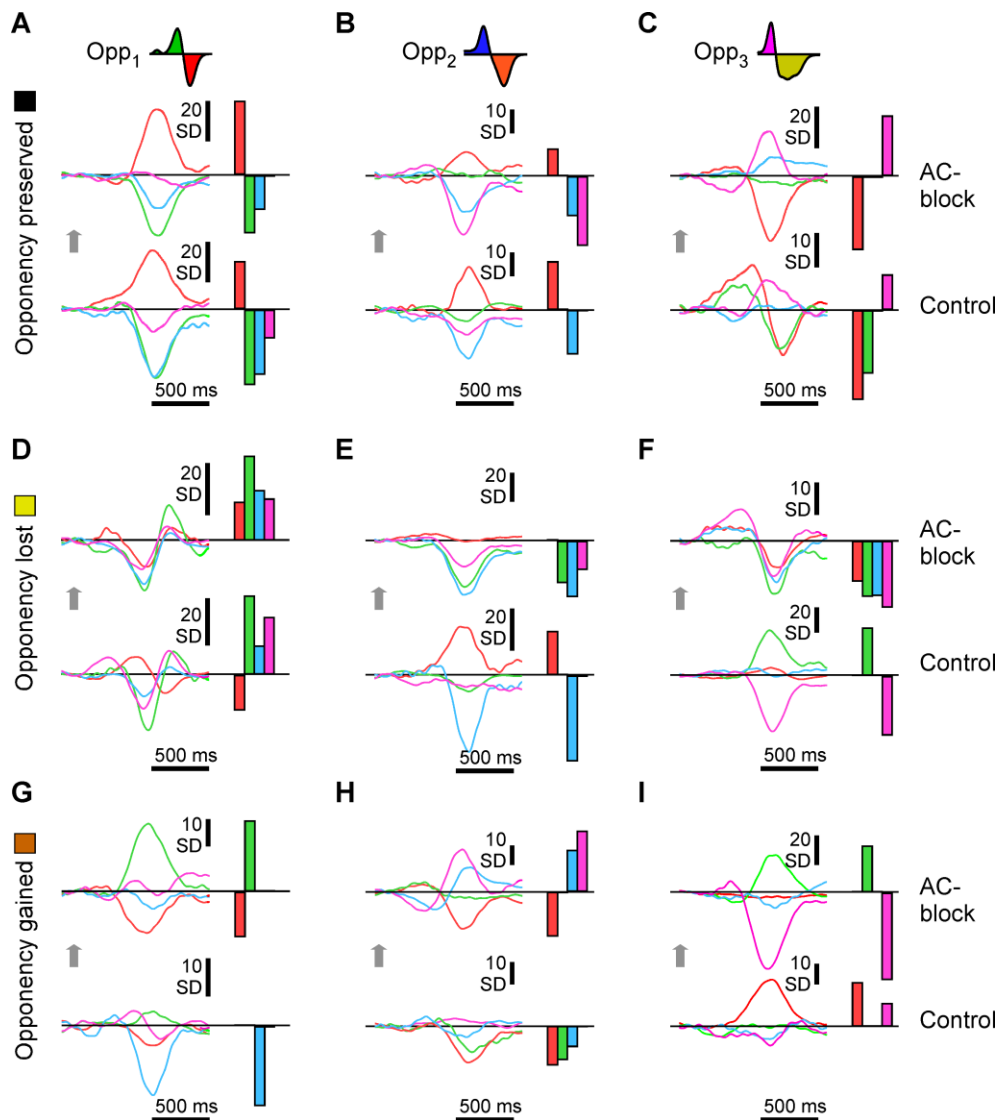

430

431 **Figure 4 – Preservation, loss and gain of BC opponency following AC-block. A-I,** Selected  
432 example BCs (paired data) that either preserved (A-C), lost (D-F) or gained (G-I) spectral opponency  
433 following pharmacological removal of inner retinal inhibition. Examples from all three types of  
434 opponencies are presented: red:green (Opp<sub>1</sub>, A, D, G), red/(green):blue (Opp<sub>2</sub>, B, E, H), (red)/green:UV  
435 (Opp<sub>3</sub>, C, F, I). Shown in each case are the four spectral kernels (left) and their automatically extracted  
436 response amplitudes (right, Methods).

437

438 **Colour opponent BC-circuits occur in different parts of the inner retina in the**  
439 **presence and absence of ACs.** Even though across the population of recorded  
440 BCs, the relative abundances of the three opponent groups remained  
441 approximately unaffected by AC-block, this was not the case with regards to their  
442 distribution across the IPL. Instead, blocking ACs reduced the abundance of  
443 opponent BCs towards the IPL centre but increased their abundance in the most  
444 GCL-adjacent strata as well as around the lower Off-layer (Figure 3E,F for all data,  
445 Figure 3G,H for paired data). The spatial pattern of this redistribution is  
446 reminiscent of the native distribution of On- versus Off-responses in larval  
447 zebrafish (which includes the presence of ‘ectopic’ Off-terminals beneath the  
448 traditional On-layer, Figure 2G, see also Refs<sup>14,15</sup>). It thus appears that upon AC-  
449 block, BC-opponency tends to be lost where native On-circuits predominate but  
gained where native Off-circuits predominate.



450  
451

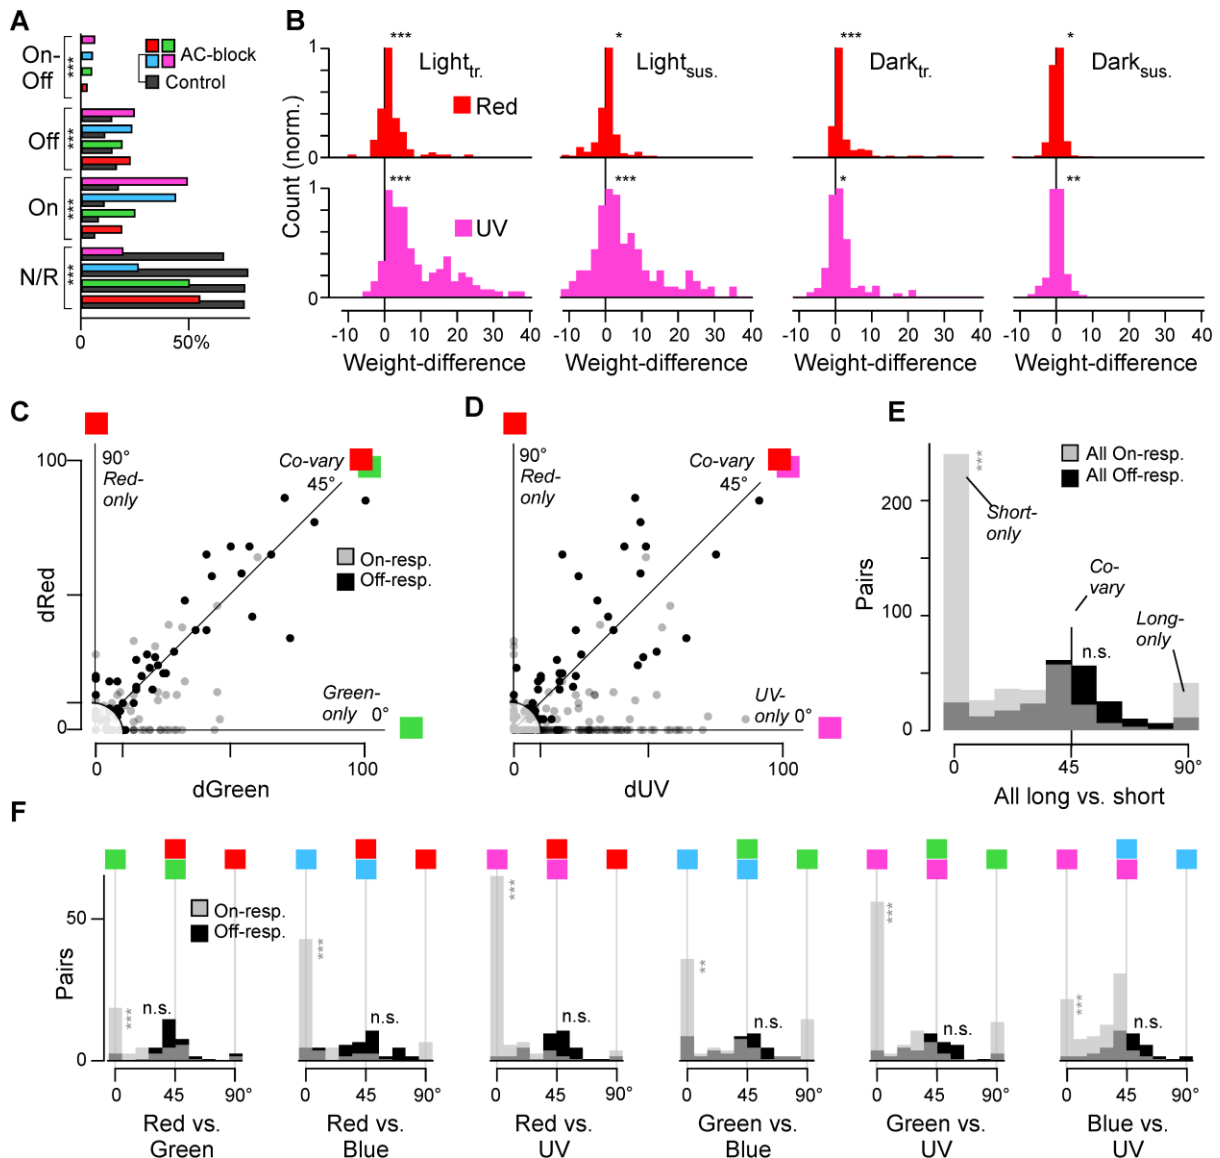

452

453 **Figure 5 – Selective spectral modulation of the On-pathway.** **A**, redistribution of response polarities following AC-block (cf.  
 454 *Figure 2H*) based on “colour” step responses (cf. *Figure 1I*). As for “white” steps, each “colour” step response was analysed  
 455 independently and sorted into four polarity groups (On-Off, Off, On, N/R). Chi-squared tests,  $p = 3.62 \times 10^{-10}$  (red),  $p = 7.74 \times 10^{-16}$   
 456 (green),  $p = 8.79 \times 10^{-49}$  (blue),  $p = 2.87 \times 10^{-42}$  (UV). **B**, weight difference of paired red (top row) and UV (bottom row) step  
 457 responses. From left: Light-transient, Light-sustained, Dark-transient, and Dark-sustained. Wilcoxon Signed-Rank test, for red:  
 458  $p = 1.90 \times 10^{-5}$  (Light-transient),  $p = 0.047$  (Light-sustained),  $p = 3.43 \times 10^{-11}$  (Dark-transient),  $p = 0.026$  (Dark-sustained); for UV,  
 459  $p = 8.5 \times 10^{-24}$  (Light-transient),  $p = 5.3 \times 10^{-5}$  (Light-sustained),  $p = 0.014$  (Dark-transient),  $p = 0.0012$  (Dark-sustained). **C-F**, co-  
 460 variation of absolute response amplitudes changes (in SD) after AC-blockage, compared across different pairs of wavelengths  
 461 (paired data). (C,D) shows individual scatterplots for red versus green (C) and red versus UV (D). On- and Off-responses  
 462 plotted separately, as indicated. Angular histograms (E,F) were computed from these scatterplots. In each case, 45° indicates  
 463 co-variation, while peaks around 0° and 90° indicate that one of the two compared wavelength responses changes  
 464 independently of the other. Datapoints with an Euclidean distance <10 from the origin were excluded from further analysis  
 465 (shaded area in C and D). (F) shows the individual comparisons (e.g. the first histogram pair corresponds to the scatterplot  
 466 shown in (C)), while (E) shows the sum of all six histograms from (F). Note Off-responses tended to co-vary (peak at 45°), while  
 467 On-responses exhibited a more diverse distribution, which included peaks at 0°, 45° and 90°. Wilcoxon Signed-Rank test for  
 468 each colour combination, tests were performed between On- or Off-angular distributions and 45°: All On (E):  $p = 1.5 \times 10^{-36}$ , All  
 469 Off (E):  $p = 0.32$ ; Individual On (F):  $p = 7.9 \times 10^{-5}$  (red vs. green),  $p = 1.7 \times 10^{-7}$  (red vs. blue),  $p = 3.4 \times 10^{-14}$  (red vs. UV),  $p = 0.0048$   
 470 (green vs. blue),  $p = 6.8 \times 10^{-8}$  (green vs. UV),  $p = 6.1 \times 10^{-9}$  (blue vs. UV); Off:  $p = 0.38$  (red vs. green),  $p = 0.97$  (red vs. blue),  $p =$   
 471  $0.24$  (red vs. UV),  $p = 0.56$  (green vs. blue),  $p = 0.89$  (green vs. UV),  $p = 0.30$  (blue vs. UV).

472

473

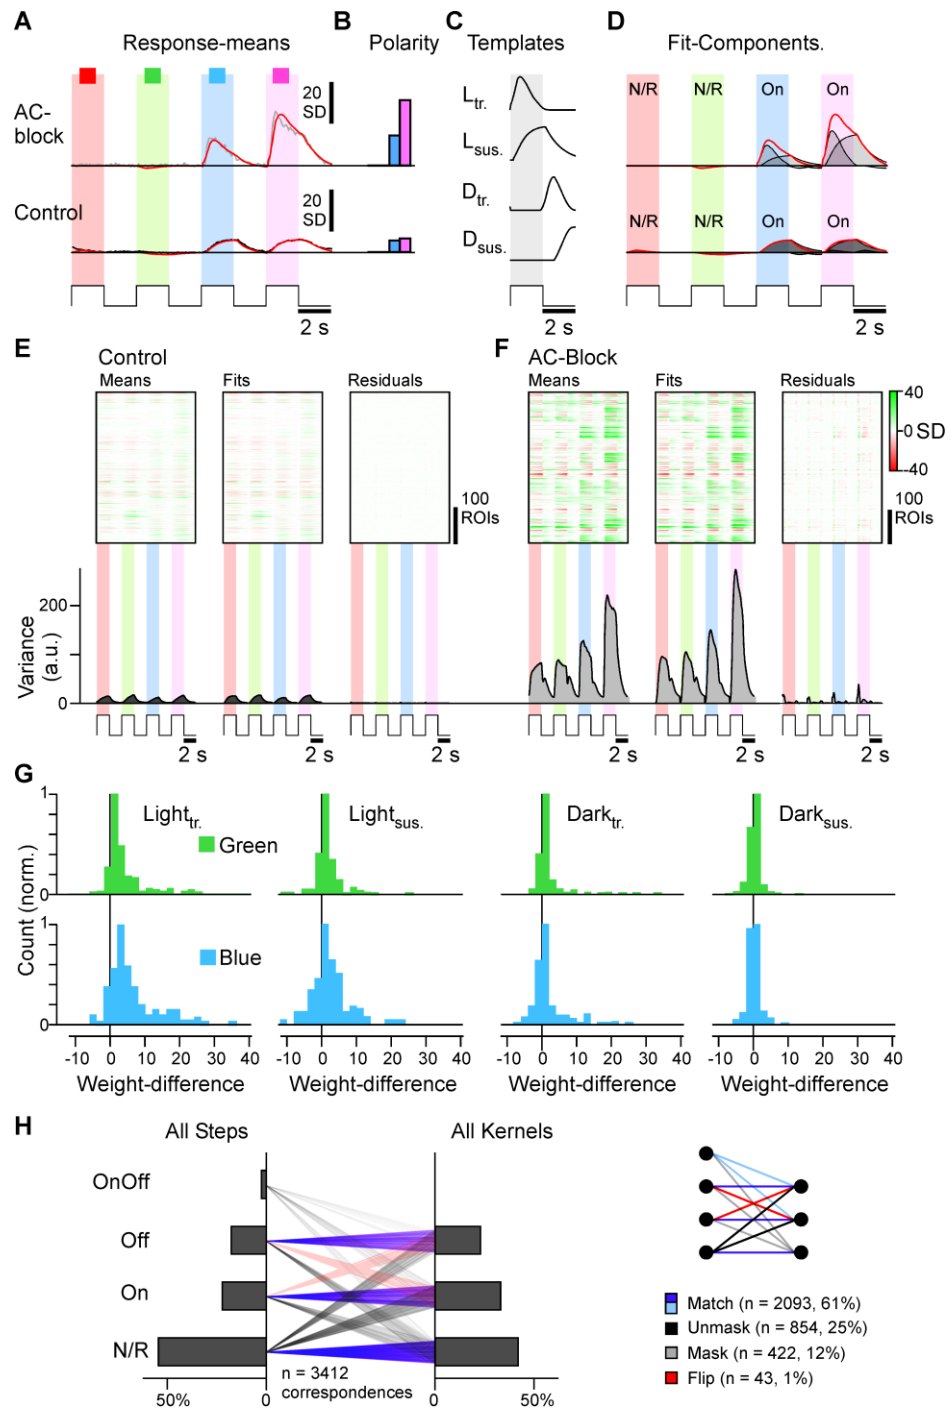

474

475

476

477

478

479

480

481

482

483

484

485

486

487

488

489

490

491

492

**Figure S4 – related to Figure 5.** A-D, template fitting approach for the “colour” step stimulus (cf. Figure 11, Figure 2A-D). One example pair is shown in (A), with fits (red) plotted superimposed on the trial-averaged colour step responses. Note that for simplicity, the four weights corresponding to each colour-fit are collapsed into a single number (B, Methods). Templates used (C) are truncated versions of those used for fitting white steps (colour steps were 2 s On 2 s Off, while white steps were 3 s On 3 s Off). The full fit result for this example cell is shown in (D). E,F, (as Supplemental Figure 2A,B), evaluation of fit results for the colour steps. G, as Figure 5B, here shown for green and blue. Wilcoxon Signed-Rank tests, green:  $p = 3.44 \cdot 10^{-15}$  (Light-transient),  $p = 0.15$  (Light-sustained),  $p = 3.64 \cdot 10^{-6}$  (Dark-transient),  $p = 0.062$  (Dark-sustained); for blue,  $p = 1.4 \cdot 10^{-23}$  (Light-transient),  $p = 0.050$  (Light-sustained),  $p = 0.0024$  (Dark-transient),  $p = 0.0094$  (Dark-sustained). H, pairwise comparison of individual BC polarities computed from the “colour” steps (left) and kernels (right). For this analysis, each BC contributes eight polarity-values: four for the steps, and four for the kernels. Control and drug data are pooled. Correspondingly, there 412 (control) plus 441 (AC-block) times four correspondences shown (i.e.  $n = 3,412$ ). Across these, the allocated polarities exhibited a direct polarity match in  $n = 2,093$  cases (61%, purple, ‘match’). In contrast, only  $n = 43$  cases exhibited a polarity inversion (1%, red, ‘flip’). The remainder of cases occurred when either the steps ( $n = 854$ , 25%, ‘unmask’) or the kernels ( $n = 422$ , 12%, ‘mask’) yielded a non-response despite the respective other measure yielding a response. For further detail, see Methods.

493 **ACs modulate BC-spectral processing via the On-channel.** Based on the  
494 anatomical link between the representation of opponency and polarity within the  
495 inner retina (Figure 3E,F, cf. Figure 2F-J) we next wondered if generally, spectral  
496 processing in On- and Off-circuits was differentially affected by AC-block. For this,  
497 we used the “colour-step” stimulus (Figure 1I) and as before (Figure 2A-E) fitted a  
498 BC’s overall response with a weighted sum of four kinetic “building-blocks”  
499 (Supplemental Figure 4A-F Methods; for a comparison of step responses and  
500 kernels see Supplemental Figure 4H and Methods). We then analysed each  
501 spectral step to again assess the redistribution of response polarities across  
502 wavelengths (Figure 5A cf. Figure 2H). This highlighted two main wavelength-  
503 dependent effects of AC-mediated inhibition in BC: one, wavelength-specific  
504 changes tended to be increasingly pronounced for shorter wavelengths, and two,  
505 they mostly occurred in the On-channel.

506 Under control conditions, the percentages of unresponsive BCs were similar  
507 across wavelengths (76%, 76%, 77%, 66% for red, green, blue, UV, respectively);  
508 however, following AC-block this ratio fell to 55%, 50%, 27% and 19%,  
509 respectively (Figure 5A), indicating that the disinhibition of BC signals following  
510 AC-block was most pronounced for UV, followed by blue, then green, and finally  
511 red. This short wavelength-bias was essentially restricted to the On-channel, while  
512 the Off-channel was boosted in an approximately wavelength-independent  
513 manner. The short-wavelength On-bias could also be observed when comparing  
514 the changes amongst the four kinetic components (Figure 5B, cf. Figure 2J,  
515 Supplemental Figure 4G).

516 We next used the paired dataset to assess the degree of response co-variation  
517 across wavelengths following AC-block (Figure 5C-F). We reasoned any  
518 achromatic effects of ACs on BCs should lead to a high degree of covariation  
519 across wavelengths, while any spectral ‘retuning’ of BCs should manifest in some  
520 wavelength-responses being affected more than others. The results from this  
521 analysis cemented the idea that essentially all spectral modulation of BCs by ACs  
522 occurred via the On-channel.

523 Figure 5C shows On- and Off-amplitude changes in response to the red step of  
524 light plotted against the corresponding amplitude changes in response to the  
525 green step of light. In this case, most Off-points fell near the equivalence line ( $45^\circ$ ),  
526 indicating that red- and green-Off response-changes tended to co-vary. Similarly,  
527 many On-points fell on the equivalence line; however, in this case, a second  
528 population of points fell on or near the  $0^\circ$  line. This latter population indicated that  
529 in some BCs, response amplitudes changed in green without simultaneously  
530 changing in red. Only few points fell on the  $90^\circ$  line, indicating a notable absence  
531 of On-responses that were modulated in red without also being modulated in  
532 green.

533 To summarise this behaviour, we computed the corresponding angular histogram  
534 (Figure 5F, first entry), which showed a single peak around  $45^\circ$  for Off-responses  
535 indicating mostly co-variation, but two main peaks for On-responses: one at  $45^\circ$ ,  
536 and another at  $0^\circ$ . This general pattern was stable for all possible colour  
537 combinations (Figure 5D-F). In the On-channel, but not in the Off, shorter  
538 wavelength responses were consistently modulated more strongly than long  
539 wavelength responses. The only spectral combinations that exhibited any  
540 appreciable degree of long-wavelength isolation were green versus blue and  
541 green versus UV (peak at  $90^\circ$  in 4<sup>th</sup> and 5<sup>th</sup> entries in Figure 5F), indicating a  
542 putative ‘special’ role of AC-inputs for modulating green-On circuits.

543 Taken together, our data overwhelmingly support the idea that ACs modulate the  
544 gain of short-wavelength responses predominately, and notably point to the On-  
545 rather than the Off-channel for shaping spectral tuning amongst BCs. This spectral  
546 On-channel dominance can also be appreciated in example cases of both non-  
547 opponent (Figure 6A-D) and opponent BCs (Figure 6E-H).

548

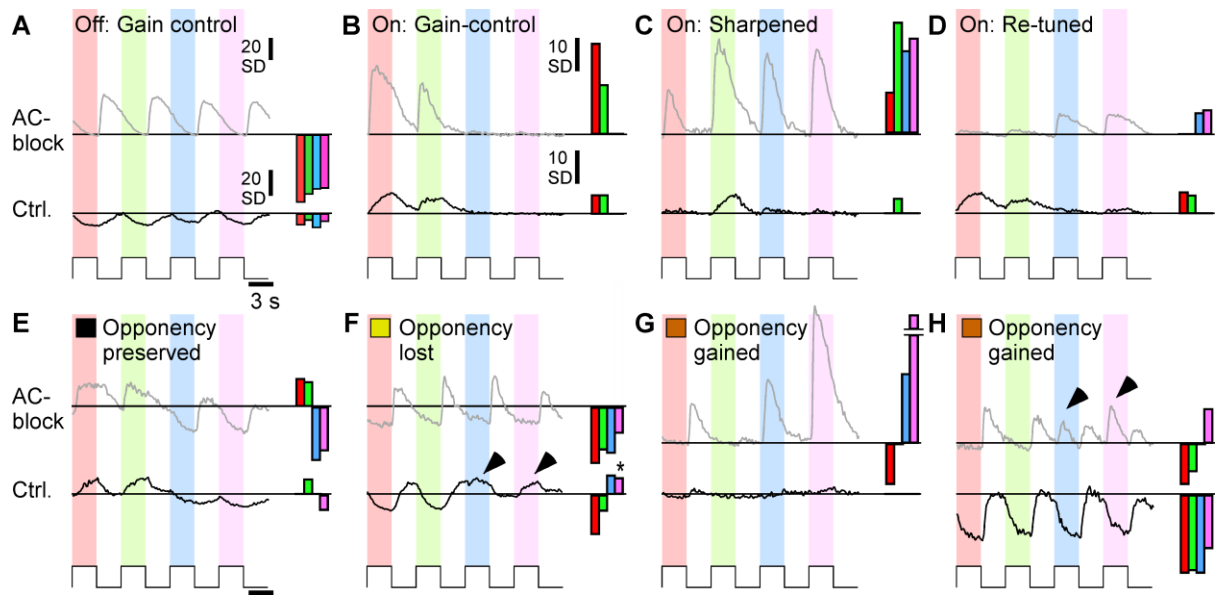

549

550 **Figure 6 | Spectral re-tuning mainly uses the On-channel.** A-H, Selected example BC "colour" step responses (trial  
551 averages) during control condition (bottom) and following AC-block (top, paired data), illustrating a range of 'typical' results.  
552 Generally, changes in Off-responses tended to be similar across all tested wavelengths (e.g.: A). In contrast, changes in On-  
553 responses tended to be more spectrally diverse, and often effected a change in overall spectral tuning (e.g. panels C,D)  
554 including in spectral opponency (e.g. panels F-H). Arrowheads in (F) and (H) highlight wavelength-specific switches in the On-  
555 channel that led to a change in colour-opponency.

556

557 **ACs exhibit low spectral diversity.** We next wondered how the different  
558 manifestations of AC-effects on BC spectral processing across the IPL and polarity  
559 regimes might reflect colour processing in the ACs themselves. Accordingly, we  
560 expressed SyGCaMP3.5 under the ptf1a promoter which targets the vast majority  
561 of ACs in zebrafish<sup>44,45</sup> (Figure 7A). We then recorded dendritic calcium responses  
562 of ACs to the same battery of stimuli used to probe BCs. ROIs were placed based  
563 on local response correlation using previously established analysis pipelines<sup>12,37</sup>  
564 (Figure 7B,C, Methods). We recorded from both the acute zone<sup>46</sup> and from the  
565 nasal retina and pooled the data (n = 10 scans each). Across the entire dataset  
566 ROIs were detected at all IPL depths, and like for BCs, AC-responses tended to  
567 occur predominately in two major bands, towards the respective centres of the  
568 traditional On- and Off-layers (Supplemental Figure 5).

568

569 We next used a Mixture of Gaussian model to cluster ACs based on their function  
570 (Methods). This returned 27 clusters, here arranged by IPL depth (Figure 7D-H, cf.  
571 Supplemental Figure 5). To what extent these clusters correspond to AC-types  
572 remains unknown, and in view of >60 AC types in mice<sup>21</sup>, 27 putative types in  
573 zebrafish probably underestimates their full diversity. Such possible  
574 underestimation is likely part related to the necessarily incomplete sampling of the  
575 full stimulus space. Nevertheless, our clusters showcased a substantial response  
576 diversity in terms of kinetics and polarities, however notably less so in terms of  
577 spectral signals. For example, eight out of ten Off-stratifying AC-clusters (C<sub>1-5,7-10</sub>)  
578 exhibited Off-responses to the 'white' step of light (Figure 7D). These clusters  
579 differed strongly in their temporal properties (Figure 7D), but hardly at all in their  
580 spectral tunings (Figure 7E-G). The remaining two Off-stratifying clusters exhibited  
581 On-responses (C<sub>6,9</sub>). Next, based on the responses to the "white" step of light, AC-  
582 clusters stratifying in the traditional On-layer (C<sub>11-C27</sub>) were comprised of eleven  
583 On-clusters (C<sub>11,13-15,17-19,23,24,26,27</sub>), three Off-clusters (C<sub>12,20,25</sub>) and three On-Off-  
584 clusters (C<sub>16,21,22</sub>). At the level of kinetics ACs strikingly resembled the  
585 corresponding changes observed amongst BCs upon AC-block (Supplemental  
586 Figure 8A, cf. Figure 2J), indicating a tight correspondence between these  
587 observations.

587

588



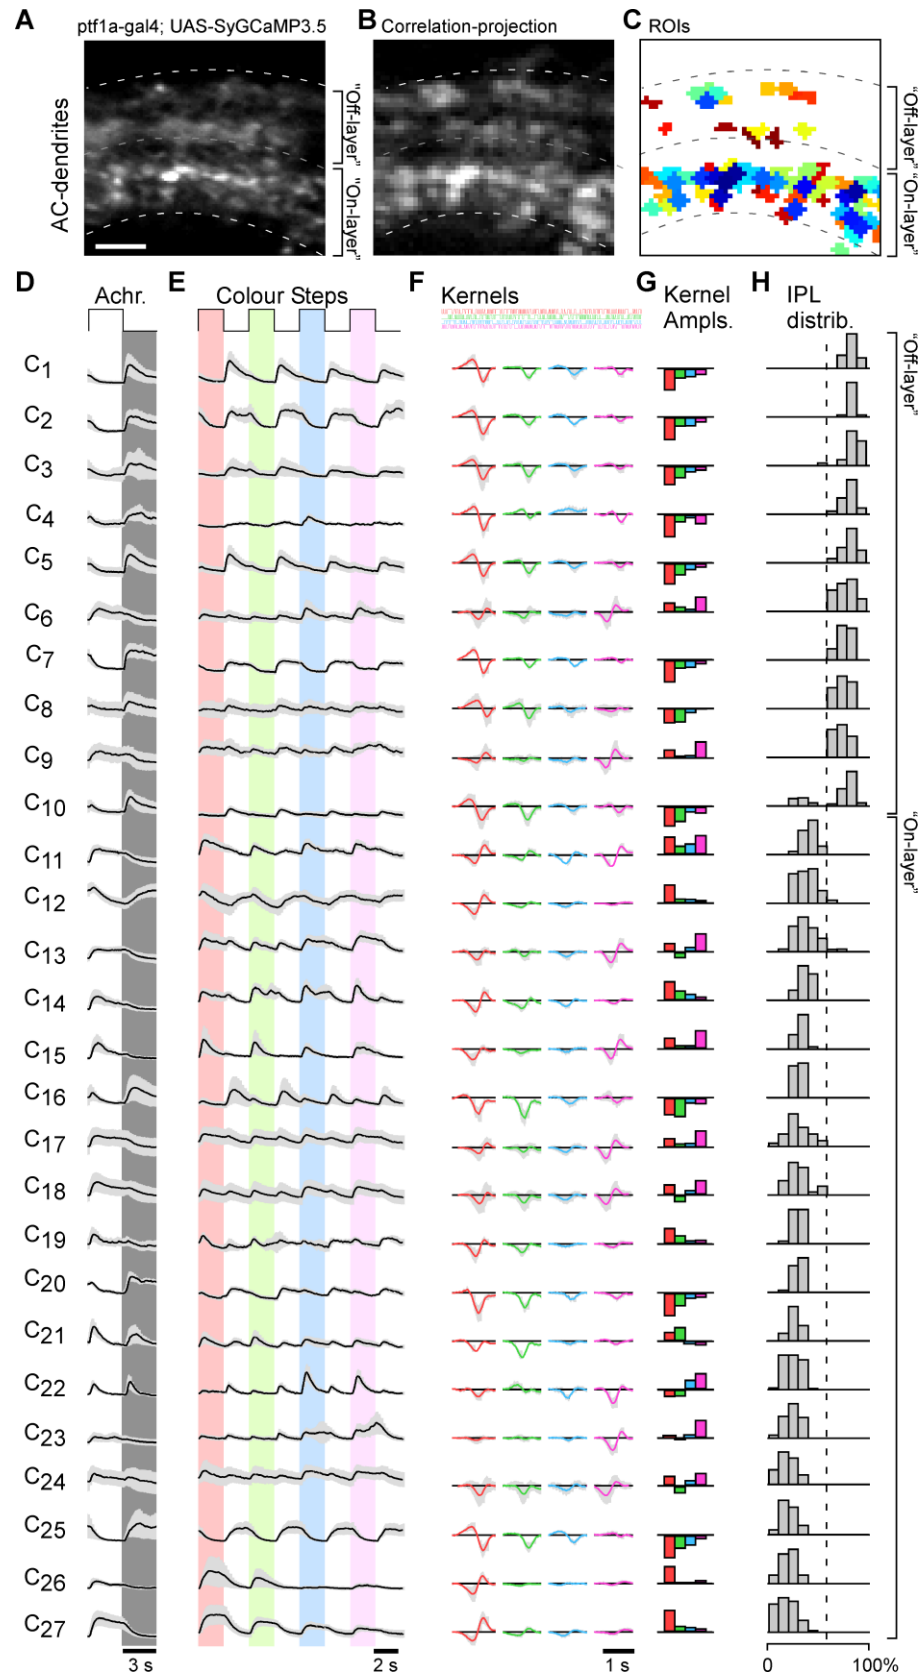

589

590 **Figure 7 – Spectral processing in ACs.** A-C, Example scan of syGCaMP3.5 expressing AC-dendrites within the IPL, showing  
 591 the scan average (A), a projection of local response correlation, indicating regions of high activity (B) and the correspondingly  
 592 placed ROI-map (C). D-H, Overview of AC-clusters based on the responses of  $n = 1,743$  ROIs in  $n = 20$  scans from  $n = 6$  fish  
 593 (Methods) to the same battery of stimuli used to probe BC-functions (cf. Figure 1). Shown are the mean  $\pm$  SD of the step in the  
 594 'white' chirp (D), the corresponding "colour" steps (E), kernels (F) and their extracted amplitudes (G), and each cluster's  
 595 distribution across the IPL (H).

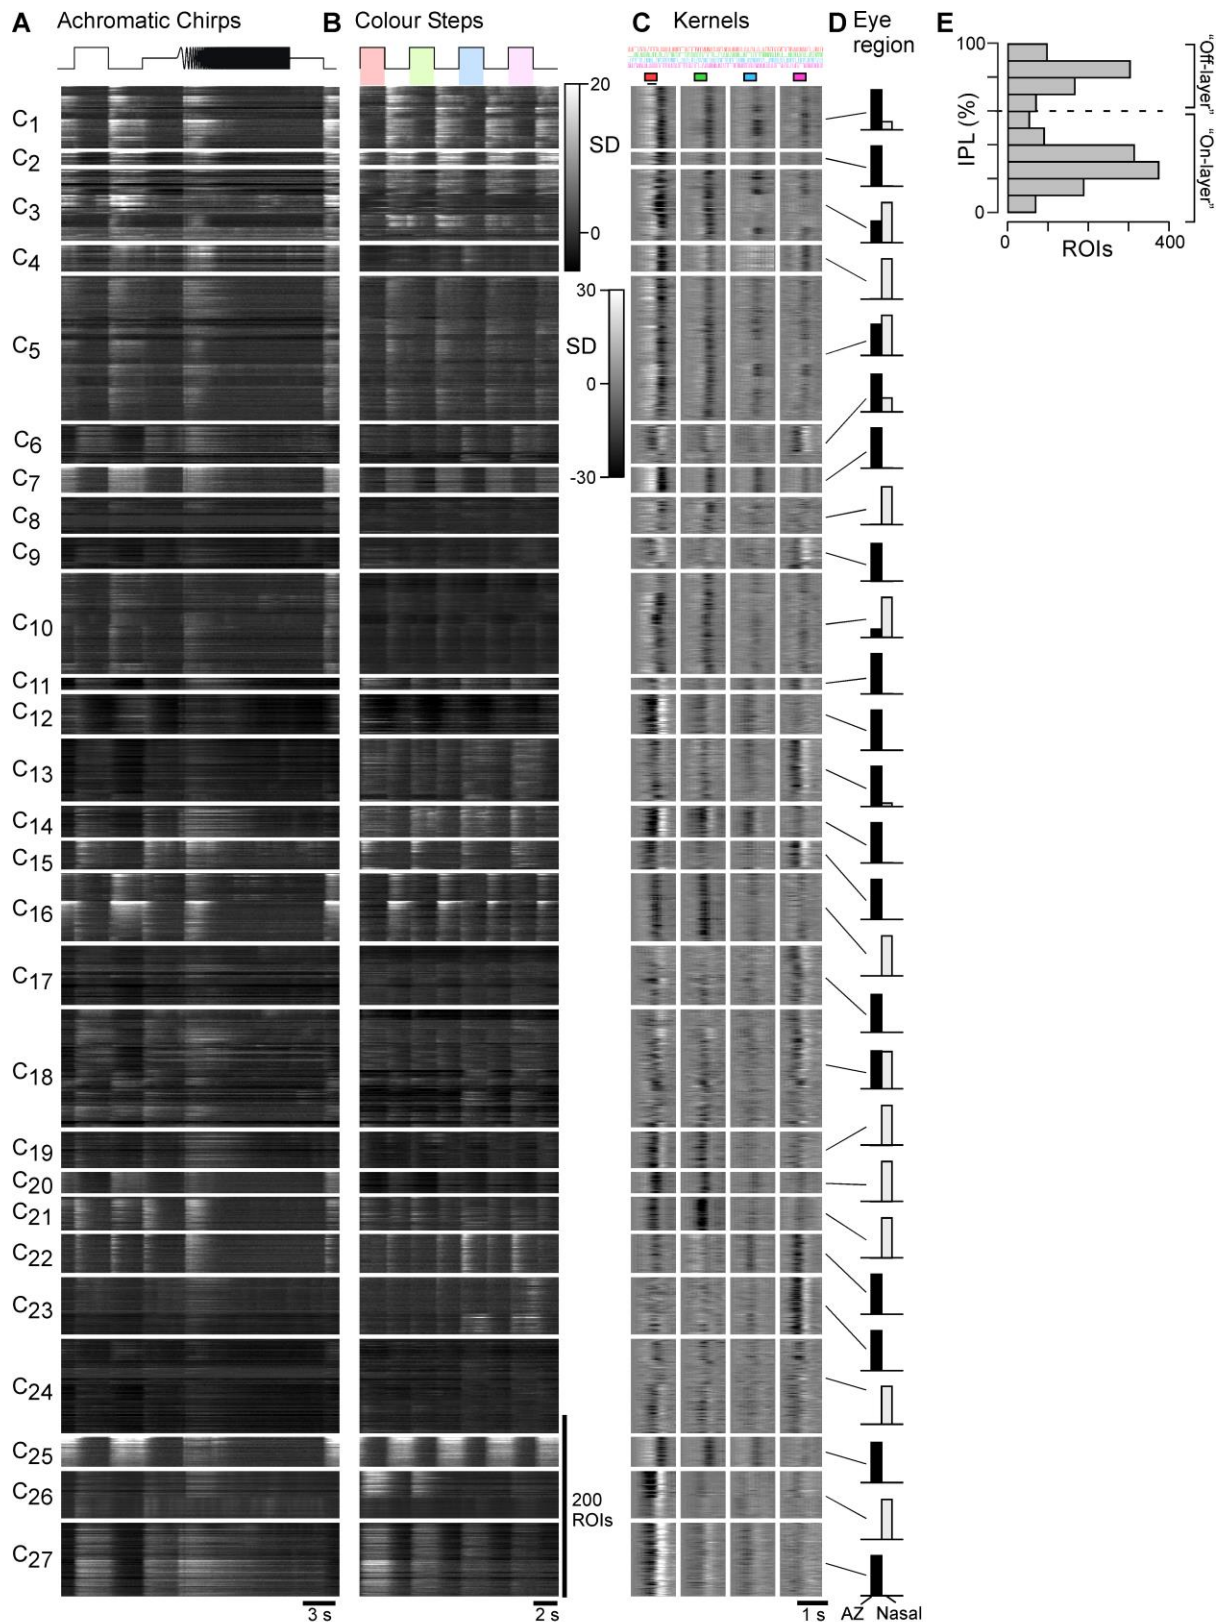

596

597 **Figure S5 – related to Figure 7.** Detail of AC clusters, showing heatmaps of the full dataset leading to the cluster means  
 598 shown in Figure 7. Shown are the full chirps (A, note that for simplicity, only the step portion is shown in Figure 7), the “colour”  
 599 steps (B), the kernels (C) and the eye region of the included ROIs (D, Acute zone or Nasal retina). E, IPL distribution of all AC-  
 600 ROIs.

601

602 Next, despite their substantial diversity in terms of polarities and kinetics (Figure  
603 7D), the 27 AC-clusters were readily sorted into only four spectral groups (Figure  
604 8A-D, Methods): two large non-opponent groups (long-biased: C<sub>1-5,7,8,10,12,14,16,19,20,25,-27</sub>; “V-shaped”: C<sub>6,9,11,15,17</sub>, Figure 8A,B) which together  
605 comprised 21 of the 27 clusters, and two small opponent groups which comprised  
606 the remaining six (RG/BU: C<sub>21,22</sub>; RBU/G: C<sub>13,18,23,24</sub>, Figure 8C,D). In fact, all  
607 eleven Off-clusters, as well as five of the ten On-clusters were spectrally very  
608 simple indeed, all falling into the long-wavelength biased non-opponent group  
609 (Figure 8A). The remaining five non-opponent On-clusters fell into a second  
610 relatively simple group that was spectrally “V-shaped” (Figure 8B). Accordingly,  
611 the vast majority of ACs clusters, which included all non-opponent clusters,  
612 exhibited only two flavours of spectral responses. These ACs might, therefore, be  
613 expected to primarily shape non-spectral BC and/or RGC functions.  
614

615 The remaining six clusters, which were classed as opponent (Figure 8C,D), all  
616 exhibited prominent On-Off responses to at least a subset of the spectral steps  
617 (e.g. Figure 8E,F). In all six cases, their opponency resulted from a spectral  
618 rebalancing of On- versus Off- amplitudes rather than a “classical” full polarity  
619 inversion as in BCs<sup>14</sup>. Taken together, and perhaps surprisingly, from a spectral  
620 point of view, ACs were substantially less complex than BCs (Figure 3, see also  
621 Refs<sup>14,15</sup>).

622 **AC spectral tunings are mostly explained by inputs from the “achromatic”**  
623 **red- and UV-cones.** Based on the spectral simplicity of most AC-clusters, we next  
624 wondered to what extent their tuning functions might be explained from the  
625 spectral tunings of the cones. In zebrafish, red- and UV-cones are non-opponent,  
626 and associated with achromatic processing, while green- and blue-cones are  
627 strongly opponent, and associated with “colour” processing<sup>7</sup>.

628 Here, superposition of the different cones’ tuning functions on those of ACs  
629 strongly hinted that most AC-spectral tunings might be readily explained by inputs  
630 from red- and UV-cones alone (shadings in Figure 8A-D). For example, the sixteen  
631 long-wavelength-biased AC-clusters were highly reminiscent of red-cones (Figure  
632 8A). Similarly, the five spectrally V-shaped AC-clusters and both RG:BU-opponent  
633 clusters were reminiscent of non-opponent (Figure 8B) and opponent (Figure 8C)  
634 combinations of red- and UV-cone signals. Only the remaining four RBU:G-  
635 opponent clusters appeared to mimic diverse forms of UV- versus green-cone  
636 opponencies (Figure 8D).

637 To quantitatively confirm these matches, we fitted the spectral tuning function of  
638 each AC-cluster with those of all four cones, or with various possible subsets  
639 thereof (Figure 8G). While, as expected, the best fits were achieved when using all  
640 four cones as inputs (on average capturing 97%, 85%, 92% and 88% of the  
641 signals amongst the four spectral AC-groups, respectively), only marginally lower  
642 quality fits were achieved by substantially simpler cone combinations  
643 (Supplemental Figure 6B, Figure 8F,G). For example, restricting inputs to only red-  
644 and UV-cones still allowed capturing 86% and 82% of the signals across long-  
645 wavelength biased and V-shaped groups, respectively (Figure 8G, red dotted  
646 lines). The same restricted model also allowed capturing 91% of the signal in one  
647 of the two RG:BU opponent groups (C<sub>22</sub>).

648 However, the same strategy could not explain the remaining five opponent  
649 clusters, capturing only an average of 58%. Capturing these opponent clusters  
650 instead required exchanging red- for green-cone inputs, still alongside UV-cones,  
651 capturing 81% signal amongst four RBU:G opponent clusters compared to 88% in  
652 the full model (Figure 8G, green dotted lines). The single remaining RG:BU-  
653 opponent cluster (C<sub>21</sub>) remained poorly captured by this strategy (62%); however,  
654 this could be restored to 88% by using both red- and green-cones alongside UV  
655 (turquoise dotted line).

656 Taken together, 22 of 27 AC-clusters are therefore reasonably explained by inputs  
657 from red- and UV-cones alone, while the remaining five – all opponent – could be

658  
659  
660  
661  
662

explained by additional inputs from green-cones, either alongside or without red-cones. Blue-cones were generally not required to capture the essence of any ACs' spectral tuning functions. Overall, the spectral simplicity of most ACs, and the apparent predominance of inputs from the two non-opponent cones, supports the idea that zebrafish ACs are not primarily set-up for spectral processing.

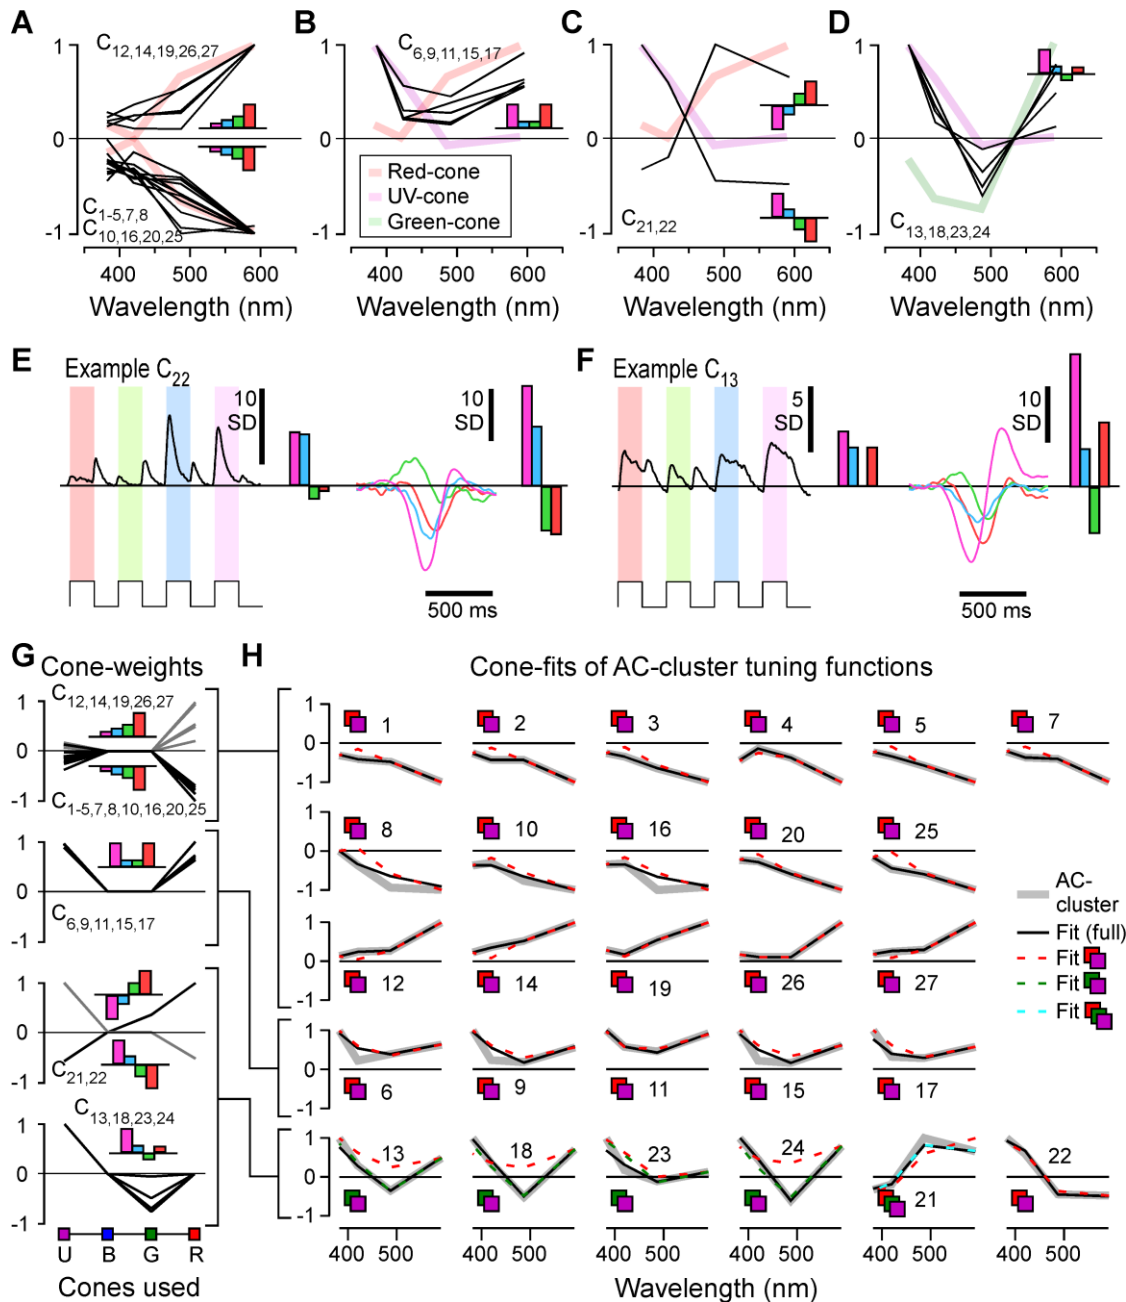

663

664 **Figure 8 – spectral processing in ACs.** A-D, Spectral tuning functions of all AC-clusters, allocated to one of four groups as  
665 shown: Long-wavelength biased (A), V-shaped (B), long-short opponent (C), and “green-opponent” (D). Plotted behind the AC-  
666 spectral tunings are “reduced” tuning functions of selected cones (cf. Supplemental Figure 3D) to illustrate qualitative spectral  
667 matches between cones and AC-clusters. E, F, Means of “colour” steps and kernels of two selected example clusters that were  
668 classed as opponent. Note that in both cases, the opponency arises due to a wavelength-dependent rebalancing of On-Off  
669 responses, rather than a “classical” full-polarity reversal. G, H, Cone-weights (G) and overview of fits (H) between spectral  
670 tuning functions of “reduced” cones (see above) and AC-cluster means. The four plots in (G) correspond to the four spectral  
671 groups shown in (A-D). (H) shows one panel per cluster as indicated, sorted by their spectral groups. Shown are: AC-cluster  
672 mean (grey, thick), the best fit when using all four cones (black) and the fit result when only using red- and UV-cones (red,  
673 dashed). We also show the fit results for the six opponent clusters (bottom row) when using only green- and UV-cones (green,  
674 dashed) and when using red-, green- and UV-cones (light blue, dashed). For evaluation of fit qualities, see Supplemental  
675 Figure 6B.

676



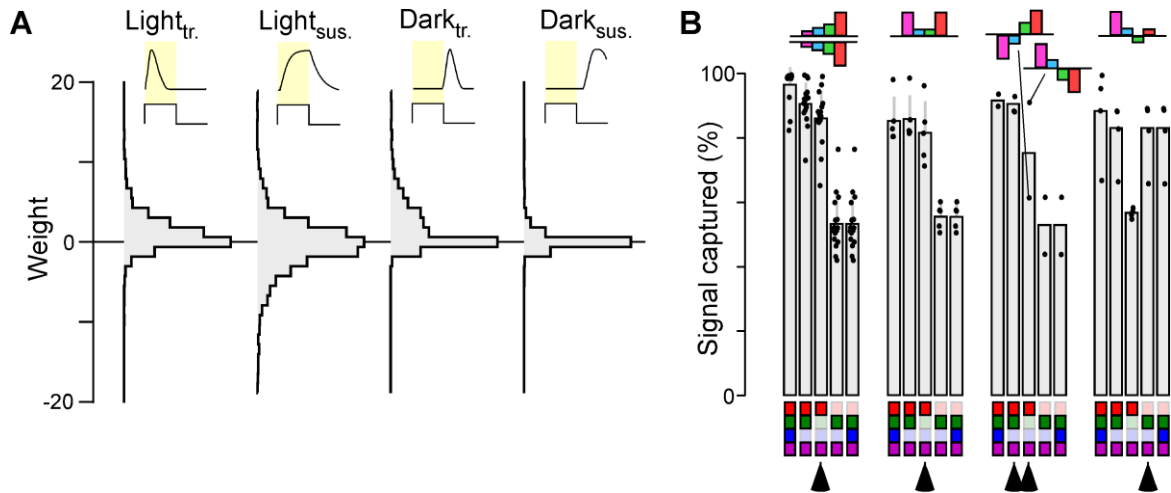

677

678 **Figure S6 – related to Figure 8.** **A**, Summary of kinetic component weights used to fit the ‘white’ step responses across all  
 679 AC-ROIs, shown as peak normalised (cf. [Figure 2J](#) for BCs). **B**, evaluation of fit quality for the model linking the spectral tuning  
 680 functions of “reduced” cones with those of AC-cluster means. Shown in each case is the percentage of the AC-clusters’  
 681 spectral signal captured (as area under the curve) by each fit. The cone-combinations used for each fit are indicated below, and  
 682 the four spectral groups (cf. [Figure 8A-D](#)) plotted separately as indicated. In each case, the best fits allowing for >80% signal  
 683 capture are indicated by the arrowheads.

684

685 **ACs exhibit the highest spectral diversity in the traditional On-layer.** Finally,  
 686 despite the relative spectral simplicity of ACs, our data from BCs shows that at  
 687 least some ACs must impact inner retinal colour processing. Since most of the  
 688 spectral tuning amongst BCs occurred in the traditional On-layer of the IPL ([Figure](#)  
 689 [3E-H](#)), we assessed if the ACs might also show their highest spectral diversity in  
 690 this part of the inner retina. This was indeed the case ([Figure 9](#)): while the  
 691 traditional Off layer was near-exclusively occupied by red-cone-like ACs, alongside  
 692 a comparatively minor contribution from V-shaped ACs, the On-layer comprised  
 693 representatives from all spectral AC-groups, including the vast majority of ROIs  
 allocated to any of the six of the colour opponent AC clusters.

694

695 We conclude that most spectral interactions between ACs and BCs that contribute  
 696 towards “dynamically preserving” colour opponency in BCs ([Figure 3](#)) occur in the  
 697 traditional On-layer of the IPL ([Figure 9](#)).

697

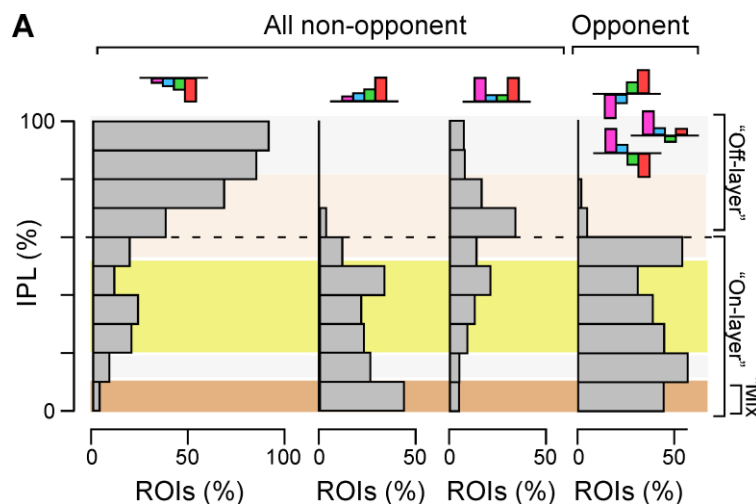

698

699 **Figure 9 – The On-layer harbours most spectral diversity among ACs.** IPL-profiles of AC-clusters  
 700 by spectral group as indicated (cf. [Figure 8A-D](#)). Note that the long-biased clusters are divided into “On”  
 701 and “Off” groups, while the opponent groups are combined. The background shadings correspond to  
 702 those extracted from BCs (cf. [Figure 3E-H](#)).

703

704

## DISCUSSION

705 ***The role of ACs in colour vision.*** We have shown that, despite profound impacts  
706 of ACs on diverse aspects of light processing in BCs (e.g. [Figures 1,2](#)), the  
707 population representation of colour opponency was remarkably invariant to  
708 pharmacological removal of inner retinal inhibition ([Figure 3](#)). This observation  
709 implies that ACs are not categorically required for the inner retina's encoding of  
710 key "colour information" per se. Rather, BC colour processing appears to function  
711 'in spite of the pervasive presence of inhibitory networks in the inner retina. To  
712 achieve this balance, ACs appear to implement a "switch", by which they mask  
713 pre-existing colour opponency in some BCs, while at the same time generating  
714 qualitatively equivalent information elsewhere ([Figures 3,4](#)). This switch was  
715 implemented mostly by On-circuits ([Figure 5,6](#)). Correspondingly the dendrites of  
716 ACs that exhibit spectral opponency ([Figure 7,8](#)) were located in the traditional  
717 On-layer ([Figure 9](#)). In the future, different anatomical distributions of colour coding  
718 BCs in the presence and absence of AC-inputs may provide an important handle  
719 for studying the diverse AC-BC circuits that contribute to this overall spectral  
720 balancing. Further, understanding if and how these correlative observations are  
721 causally linked will likely require the use of more specific transgenic lines that  
722 allow more selectively interfering with specific types of BCs and ACs. The same  
723 strategy should also help to decipher those BC circuits where ACs mask a pre-  
724 existing opponency.

725 ***Colour opponency in the absence of ACs.*** The complex interplay of masked  
726 and generated BC opponencies in the absence of inner retinal inhibition directly  
727 confirms the expectation that BCs do inherit diverse spectral opponencies from the  
728 outer retina<sup>5,7,14</sup>. However, the full picture is decidedly more complex than  
729 anticipated from previous work. That long- and mid-wavelength opponencies can  
730 be preserved in BCs in the absence of ACs is perhaps expected, since these two  
731 axes are already fully represented by the two mid-wavelength cones<sup>7</sup>. However, it  
732 remains unclear how the third, short-wavelength opponent axis can persist. While,  
733 as with primates<sup>47</sup>, zebrafish UV-cones (SWS1) also exhibit weak but significant  
734 "UV:yellow" opponency<sup>7</sup>, it seems implausible that this can account for the  
735 observed effects. First, this pre-existing outer retinal opponency would need to be  
736 substantially boosted to match the much more pronounced opponency in BCs  
737 (e.g. [Figure 3A](#)). Second, in cones, this opponency was restricted to the acute  
738 zone, and, therefore, it cannot account for the profusion of BCs' UV:yellow  
739 opponencies observed outside this retinal region<sup>14</sup>. Instead, the continued  
740 presence of UV:yellow opponency in BCs following AC-block strongly points to the  
741 existence of an unknown mechanism capable of selectively inverting cone signals  
742 within single BCs. Three putative and non-mutually exclusive mechanisms present  
743 themselves. First, a single BC might express both depolarising and  
744 hyperpolarising glutamate receptor systems at their dendritic tips that contact  
745 different cones. Second, BCs could receive direct inputs from HCs. For example, a  
746 putative BC driven by sign-inverted inputs from UV-cones (i.e. "UV-On") could  
747 simultaneously receive sign-preserving inputs from H1 and/or H2 HCs, which  
748 themselves carry a sign-preserving long-wavelength biased signal<sup>7</sup>. In zebrafish,  
749 the presence of direct inputs from HCs to BCs has not been observed; however,  
750 the concept is tentatively supported by the anatomical presence HC-BC contacts  
751 in mice<sup>48</sup>. Third, zebrafish might have ACs that use "fast" neurotransmitters other  
752 than GABA and/or glycine, which presumably continue to function throughout our  
753 pharmacological interventions. For example, mice feature VGlut3 ACs, a  
754 population of part-glutamatergic ACs implicated in motion processing<sup>49-51</sup>.  
755 Similarly, another key neuron implicated in mammalian motion processing is the  
756 starburst amacrine cell (SAC) which co-releases acetylcholine alongside  
757 GABA<sup>28,52</sup>. However, the functional role of SACs outside mammals remains  
758 sparsely explored<sup>53</sup>. Related, we also cannot exclude the possibility that a subset  
759 of GABA- and/or glycinergic interactions between ACs and BCs in zebrafish rely  
760 on receptor systems that were not targeted by our drug-cocktail. In the future, it  
761 will be important to experimentally test each of these possibilities.

762 ***The role of green- and blue-cone circuits in supporting inner retinal colour***  
763 ***processing.*** Unlike red- and UV-cones, zebrafish green- and blue-cones provide  
764 strongly colour opponent outputs due to feedforward signals from the HCs<sup>7</sup>.  
765 Accordingly, these cones might directly support colour opponency in BCs. In  
766 support of this hypothesis, the spectral zero-crossings marked by these two cones  
767 remain represented within BCs, both in the presence and in the absence of ACs.  
768 However, only a minority of green- and blue-cone-like BCs retained their specific  
769 opponency upon AC-block (Figure 3C). This suggests that while the signals from  
770 green- and blue- cones can be directly used to support colour opponency in BCs,  
771 this motif is by no means dominant when considering the complete circuit. Instead,  
772 most BC circuits that represent these two spectral opponencies required inputs  
773 from ACs. In zebrafish, green- but not blue-cones provide cone-type-exclusive  
774 drive for at least two anatomically distinct types of BCs<sup>11</sup>, providing a possible  
775 neural substrate for the minority of green-cone-like BCs that were unaffected by  
776 AC-block. These might account for some of the unmasked green-cone-like BCs  
777 when ACs were blocked (Figure 3C, 4G). Possible green-cone-exclusive BCs  
778 might also link with the observation that green-light stimulation could result in long-  
779 wavelength biased spectral effects on BCs (Figure 5F), and that most opponent  
780 ACs seemed to be partially built from green-cone inputs (Figure 8F).

781 In contrast, the possible roles of blue-cones in zebrafish colour vision remain much  
782 more elusive. A blue-cone-exclusive BC is not known to exist<sup>11</sup>, which leaves the  
783 origin of any “intrinsic” blue-cone-like BC-tunings unclear (Figure 3C, Figure 4B,H).  
784 Further, we found no evidence of any major involvements of blue-cones in AC-  
785 processing (Figure 8). On the other hand, the four LEDs used in the present study  
786 were not optimally placed to disambiguate blue- from UV-cone contributions  
787 (Supplemental Figure 3D). Nevertheless, our findings add to a perhaps puzzling  
788 body of evidence that questions a key role of blue-cones in shaping larval  
789 zebrafish vision<sup>5</sup>.

790 ***A special role of On-circuits in zebrafish colour vision?*** Most AC-mediated  
791 spectral tuning in BCs – whether leading to changes in opponency or simply a  
792 rebalancing of non-opponent spectral tunings – were predominately implemented  
793 via the On- rather than the Off-channel (Figures 5,6,9). This observation adds to a  
794 growing body of evidence that zebrafish generally leverage On- rather than Off-  
795 circuits to compute diverse aspects of “colour-information”. For example, both at  
796 the level of the retinal output<sup>37</sup>, and within the brain<sup>36,54,55</sup>, most spectral diversity is  
797 represented in the On-channel. In contrast, the spectral tuning function of the  
798 brain’s overall Off-response essentially resembles the spectral tuning function of  
799 red-cones in isolation, which also corresponds with the mean-spectrum of natural  
800 light in the zebrafish natural habitat<sup>7,36</sup>. From here, it is tempting to speculate that  
801 zebrafish generally use the Off-channel as an ‘achromatic reference’, while On-  
802 circuits can, where required, provide spectrally biased points of comparison to  
803 serve spectral and colour vision.

804 The predominant use of one rather than both polarities for encoding spectral  
805 information could also be advantageous, in that it might permit largely unaltered  
806 travel of the red-cones’ “true” achromatic signal to the brain: by restricting the bulk  
807 of spectral computations to the On-strata of the IPL, circuits within the Off-strata  
808 can operate in an essentially achromatic manner. In agreement, the vast majority  
809 of ACs in the Off layer exhibited such achromatic tunings (Figure 8A,B). In the  
810 future it will be interesting to test if such an On-dominance amongst spectral  
811 computations is also a feature in other vertebrates.

812 ***A short-wavelength dominance of AC-BC interactions?*** Perhaps paradoxically,  
813 the removal of inner retinal inhibition disproportionately impacted short- over long-  
814 wavelength processing in BCs (Figure 5) – even though the majority of AC circuits  
815 themselves were long-wavelength dominated (Figure 8). However, this apparent  
816 mismatch does become less pronounced when considering On- and Off-circuits in  
817 isolation. To a large extent, the long-wavelength bias amongst ACs was driven by  
818 the Off-channel. In contrast, the majority of On-ACs did in fact feature pronounced

819 UV-responses (Figure 8F). The latter might partly account for the observed  
820 dominance of UV-modulation amongst BCs, which occurred almost exclusively in  
821 the On-channel. The disproportionately high intrinsic gain of the zebrafish's UV-On  
822 system<sup>5,46</sup> might further contribute to the observed effects. Finally, it is notable that  
823 amongst the many non-opponent ACs, two spectral shapes predominate: one  
824 driven mainly by red-cones ("long biased", Figure 8A), and one driven by red- and  
825 UV-cones in approximate balance ("V-shaped", Figure 8B). In principle, this  
826 arrangement should allow the impartation of a "pure" UV-cone-like effect on BCs  
827 by combining inputs from long-wavelength biased Off-ACs with V-shaped On-ACs  
828 on a common BC, since red-cone inputs could then cancel.

829 **The origin of On-Off BCs.** Blocking ACs unmasked a small (~5%) but highly  
830 reproducible fraction of "intrinsic" On-Off responses amongst BCs that were wholly  
831 absent during control conditions (Figure 2F). What could be the source of these  
832 responses, which were mostly observed in the traditional Off-layer (Figure 2G)?  
833 Here, opponency in cones is unlikely to explain this observation. This is because  
834 cone-inversions from their "intrinsic" Off-response to an HC-mediated overall On-  
835 response occurs exclusively at long-wavelengths<sup>7</sup>; however, the unmasked On-Off  
836 BCs were short-wavelength biased (Figure 5A). Instead, as for the observed  
837 "intrinsic" UV:yellow opponent BCs (see above), their existence points to the  
838 presence of yet unexplained mechanisms of signal transfer between cones and  
839 BCs in the zebrafish retina.

840 **Author speculation: An evolutionary perspective.** Finally, our results provide  
841 tentative insights into the evolution of computation in the brain: in vertebrates and  
842 diverse invertebrate eyes alike, the evolution of "colour" computations likely  
843 preceded the evolution of complex spatiotemporal vision. This is because (i)  
844 opsins including their immediate spectral diversification preceded the evolution of  
845 highly resolved spatial vision in any animal by some 200 million years<sup>56</sup>, (ii) all  
846 extant vertebrates, including lampreys, feature subsets of the same four ancestral  
847 opsins across their photoreceptors<sup>4,5</sup>, and (iii) particularly in shallow water where  
848 vision first evolved, spectral information provides a wealth of behaviourally critical  
849 cues that do not categorically need supplementing with spatial information  
850 (discussed e.g. in Refs<sup>5,56</sup>). From here, it seems plausible that the earliest  
851 forerunners of vertebrate eyes<sup>57</sup> gradually evolved the bulk of their inner retinal  
852 circuits on top of well-functioning outer retinal circuits that already provided useful  
853 spectral information. In such a scenario, inner retinal circuit evolution would have  
854 occurred under constant selection pressure to maintain coding efficiency for colour  
855 vision, thus perhaps explaining the arrangement that we see in zebrafish today.  
856 This interpretation would further imply that perhaps also in other layered networks  
857 of brains, the primary function of some microcircuits may not be to "create new"  
858 computations, but rather to make up for computations which would otherwise be  
859 lost.

860

## 861 **METHODS**

### 862 **Lead Contact**

863 Further information and requests for resources and reagents should be directed to  
864 and will be fulfilled by the Lead Contact, Tom Baden (t.baden@sussex.ac.uk).

865 **Data and Code Availability.** Pre-processed functional 2-photon imaging data and  
866 associated summary statistics will be made freely available on Data Dryad and via  
867 the relevant links on <http://www.badenlab.org/resources> and <http://www.retinal-functomics.net>.

869 **Materials Availability.** The transgenic lines Tg(ribeye:Gal4; UAS:SyGCamp3.5),  
870 Tg(ptf1a:Gal4;UAS:SyGCamp3.5) used in this study have been previously  
871 published<sup>45</sup> and are also available upon request to the lead author.

872



873

## EXPERIMENTAL MODEL AND SUBJECT DETAILS

874

875

876

877

878

879

880

881

882

883

884

885

886

887

888

889

890

**Animals.** All procedures were performed in accordance with the UK Animals (Scientific Procedures) act 1986 and approved by the animal welfare committee of the University of Sussex. Animals were housed under a standard 14:10 day/night rhythm and fed three times a day. Animals were grown in 0.1 mM 1-phenyl-2-thiourea (Sigma, P7629) from 1 *dpf* to prevent melanogenesis. For all experiments, we used 6-8 days post fertilization (*dpf*) zebrafish (*Danio rerio*) larvae. For 2-photon *in-vivo* imaging, zebrafish larvae were immobilised in 3% low melting point agarose (Fisher Scientific, BP1360-100), placed on a glass coverslip and submerged in fish water. Eye movements were prevented by injection of  $\alpha$ -bungarotoxin (1 nL of 2 mg/ml; Tocris, Cat: 2133) into the ocular muscles behind the eye. For pharmacological AC blockage, we injected ~4 nL of a solution containing antagonist to GABA<sub>A</sub>, GABA<sub>C</sub> and glycine receptors into the anterior chamber of the retina. The estimated final concentration in the extracellular space was 5  $\mu$ M gabazine (Sigma) as antagonist of GABA<sub>A</sub> receptors; 5  $\mu$ M TPMPA (Sigma) as antagonist of GABA<sub>C</sub> receptors; 5  $\mu$ M strychnine (Sigma) as antagonist of glycine receptors<sup>38</sup>. The solution also contained 1 mM Alexa 594 for verifying the quality of the injection.

891

## METHOD DETAILS

892

893

894

895

896

897

898

899

900

901

902

903

904

905

906

907

908

909

910

911

912

913

914

915

916

**Light Stimulation.** With fish mounted on their side with one eye facing upwards towards the objective, light stimulation was delivered as full-field flashes of light. For this, we focused a custom-built stimulator through the objective, fitted with band-pass-filtered light-emitting diodes (LEDs) ('red' 588 nm, B5B-434-TY, 13.5 cd, 8°; 'green' 477 nm, RLS-5B475-S, 3-4cd, 15°, 20 mA; 'blue' 415 nm, VL415-5-15, 10-16 mW, 15°, 20 mA; 'ultraviolet' 365 nm, LED365-06Z, 5.5 mW, 4°, 20 mA; Roithner, Germany). LEDs were filtered and combined using FF01-370/36, T450/pxr, ET420/40 m, T400LP, ET480/40x, H560LPXR (AHF/Chroma). The final spectra approximated the peak spectral sensitivity of zebrafish R-, G-, B-, and UV-opsins (Supplemental Figure S3B-D), respectively, while avoiding the microscope's two detection bands for GFP and mCherry. To prevent interference of the stimulation light with the optical recording, LEDs were synchronized with the scan retrace at 1 kHz (1 ms line duration) using a microcontroller and custom scripts. Further information on the stimulator, including all files and detailed build instructions can be found in Ref<sup>35</sup>.

Stimulator intensity was calibrated to be spectrally flat at 30 mW per LED, which corresponds to low-photopic conditions. Owing to 2-photon excitation of photopigments, an additional constant background illumination of  $\sim 10^4$  R\* was present throughout<sup>66,67</sup>. For all experiments, larvae were kept at constant illumination for at least 5 seconds after the laser scanning started before light stimuli were presented. Three types of full-field stimuli were used: (i) a spectrally flat 'white' chirp stimulus<sup>68</sup> where all four LEDs were driven together, (ii) flashes of light at each of the four wavelengths (2 s On, 2 s Off), and (iii) a binary dense and spectrally flat white noise, in which the four LEDs were flickered independently in a known random binary sequence at 6.4 Hz for 300 seconds.

917

918

919

920

921

922

923

924

925

926

927

**2-photon calcium imaging.** All 2-photon (2P) imaging was performed on custom-built 2P microscope equipped with a mode-locked Ti:Sapphire laser (Chameleon 2, Coherent) tuned to 915 nm for SyGCaMP3.5 imaging. Emitted photons were collected through the objective (Nikon, MRD77225, 25X) as well as through an oil condenser (NA 1.4, Olympus) below the sample using GaAsP photodetectors (H10770PA-40, Hamamatsu). For image acquisition, we used ScanImage software (r 3.8) running under Matlab (R 2013b). All recordings were taken at 128 x 100 pixels (10 Hz frame rate at 1 ms per scan line).

**Data analysis.** Data analysis was performed using IGOR Pro 6.3 (Wavemetrics), Fiji (NIH) and Matlab R2019b / R2020b (Mathworks).

928

929 **ROI placement, IPL detection and functional data pre-processing.** Where  
930 necessary, images were xy-registered using the registration function provided in  
931 SARFIA<sup>69</sup> running under IGOR Pro 6.3. For BC data, regions of interest (ROIs)  
932 were drawn by hand based on the standard deviation projection across the  
933 tetrachromatic noise data. The ROIs from control condition and drug condition  
934 were drawn separately. Terminals were “paired” across the two conditions using  
935 the experimenter’s best judgment, which we found to be more reliable than  
936 automated procedures. The matching of terminals across conditions was greatly  
937 facilitated by the sparse expression strategy, and throughout we tried to be as  
938 conservative as possible to only match terminals when we were certain that they  
939 are the same ones (i.e. minimising false positives, at the expense of false  
940 negatives). For AC data, ROIs were defined automatically based on local image  
941 correlation over time, as shown previously<sup>12</sup>.

942 In all scans, IPL boundaries were drawn by hand using the custom tracing tools  
943 provided in SARFIA<sup>69</sup>. The IPL positions were then determined based on the  
944 relative distance of a ROIs’ centre of mass between the IPL boundaries and  
945 mapped to the range 0% to 100%.

946 Fluorescence traces for each ROI were z-normalised, using the time interval 2-6  
947 seconds at the beginning of recordings as baseline. A stimulus time marker  
948 embedded in the recording data served to align the Ca<sup>2+</sup> traces relative to the  
949 visual stimulus with a temporal precision of 1 ms. Responses to the chirp and step  
950 stimuli were up-sampled to 1 kHz and averaged over 5 trials. For data from  
951 tetrachromatic noise stimulation we mapped linear receptive fields of each ROI by  
952 computing the Ca<sup>2+</sup> transient-triggered-average. To this end, we resampled the  
953 time-derivative of each trace to match the stimulus-alignment rate of 500 Hz and  
954 used thresholding above 0.7 standard deviations relative to the baseline noise to  
955 the times  $t_i$  at which Calcium transients occurred. We then computed the Ca<sup>2+</sup>  
956 transient-triggered average stimulus, weighting each sample by the steepness of  
957 the transient:

$$F(l, \tau) = \frac{1}{M} \sum_{i=1}^M \dot{c}(t_i) S(o, t_i + \tau)$$

958 Here,  $S(l, t)$  is the stimulus (“LED” and “time”),  $\tau$  is the time lag (ranging from  
959 approx. -1,000 to 350 ms) and  $M$  is the number of Ca<sup>2+</sup> events. The resulting  
960 kernels are shown in z-scores for each LED, normalised to the first 50 ms of the  
961 time-lag. To select ROIs with a non-random temporal kernel, we used all ROIs that  
962 exceeded a standard deviation of ten in at least one of the four spectral kernels.  
963 The precise choice of this quality criterion had no major effect on the results.  
964

965 **Kernel polarity.** The use of a fluorescence-response-triggered average stimulus  
966 (here: ‘kernel’) as a shorthand for a neuron’s stimulus-response properties, while  
967 potentially powerful (e.g. Refs<sup>12,15,37</sup>), ought to be considered with some caution.  
968 For example, determining a binary value for a kernel’s polarity (On or Off) can be  
969 conflicted with the fact that a neuron might exhibit both On and Off response  
970 aspects. Moreover, different possible measures of On or Off dominance in a kernel  
971 can generate different classification biases. Here, following our previously  
972 established approach<sup>15,37</sup> we defined On and Off based on a measure of a kernel’s  
973 dominant trajectory in time. Before the calculation, we first smoothed the kernels to  
974 eliminate the high-frequency noise. After that, we determined the position in time  
975 of each kernel’s maximum and minimum. If the maximum preceded the minimum,  
976 the kernel was classified as Off, while vice versa if the minimum preceded the  
977 maximum, the kernel was defined as On.  
978

979 **Reconstruction of step responses using kinetic components.** To reconstruct  
980 each cell’s mean response into constituent spectral and temporal components we  
981 used four temporal components associated with a given light response (i.e. 3 s  
982 light, 3 s dark for ‘white’ steps, and 2 s light 2 s dark for ‘colour’ steps), following a  
983 previously described approach<sup>14</sup>. The temporal components used resembled light-

984 transient, light-sustained, dark-transient, and dark-sustained temporal profiles  
985 (Figure 2B, S5C). These components were fitted to the trial-averaged step  
986 responses of individual ROIs in sequence, in each case minimising the mean  
987 squared difference between a template's peak and the corresponding five time-  
988 points in measured response, with previously fitted components subtracted. The fit  
989 sequence was: Light-sustained, light-transient, dark-sustained, dark-transient. This  
990 yielded four corresponding weights, scaled in z-scores in accordance with the  
991 amplitudes of the trial averaged response means. To assess reconstruction quality  
992 (Supplemental Figure S2A,B and S4E,F), reconstructed data was subtracted from  
993 the original ROI-means to yield residuals. From here, we compared original data,  
994 reconstructions, and residuals based on variance explained across all ROIs (as in  
995 Ref<sup>14</sup>). To this end, we first computed the total variance across all clusters for each  
996 time-point. The result of this process, plotted beneath each corresponding  
997 heatmap showed similar time-variance profiles across cluster means and their  
998 reconstructions (panels 1 and 2), but very little remaining signal for the residuals  
999 (panel 3). From here, we computed the area under the curve for each variance-  
1000 trace and normalised each to the result from the original cluster means. By this  
1001 metric, reconstructions captured 98%, 97%, 95% and 96% of the total variance for  
1002 the 'white-control', 'white-AC-block' and 'colour-control' and 'colour-AC-block'  
1003 steps, respectively.  
1004 Response polarity per ROI was then computed as follows. A ROI was considered  
1005 as displaying an On-response if the sum of the light-transient and light-sustained  
1006 weights exceeded 3 SD. A ROI was considered as displaying an Off-response if  
1007 either the sum of the light-transient and light-sustained weights was more negative  
1008 than -3 SD, or if the sum of the dark-transient and dark-sustained components  
1009 exceeded 3 SD. If by these criteria a ROI display both On- and Off-responses, it  
1010 was counted as On-Off. ROIs failing to elicit either On- or Off-responses were  
1011 counted as non-responsive. Finally, for simplicity we also consolidated the four  
1012 kinetic weights associated with a given step into a single 'compound weight'  
1013 (shown, for example, for all colour steps). This was done by summing all weights,  
1014 with those of dark components inverted.  
1015

1016 **Relating kernels and "colour" steps.** We probed BC and AC spectral tuning in  
1017 two complementary ways: by presenting "colour" steps from dark, and via the  
1018 "colour" kernels. Here, we reasoned that while the spectral steps and the kernels  
1019 could both provide useful insight into this question, the kernels were likely more  
1020 representative of BCs' full spectral response because they measured BC  
1021 sensitivities against a grey rather than a black background. The kernels also  
1022 tended to accentuate spectral differences compared to the steps, possibly  
1023 because the spectral channels were probed simultaneously rather than in  
1024 sequence. Nevertheless, the results from steps and kernels were generally in  
1025 good agreement with each other. The polarities estimated by either method  
1026 mismatched in only 1% of cases, compared to 61% matches (Supplemental Figure  
1027 4H). The remaining 38% of correspondences stemmed from cases when either the  
1028 step-responses (25%) or the kernels (12%) did not pass our minimum response  
1029 criterion. Accordingly, by using the kernels rather than the spectral steps, we could  
1030 also draw on a larger fraction of 'responsive' BCs. Finally, kernels could by  
1031 definition never be On-Off, but instead revealed either a null-response (e.g. if On-  
1032 and Off-inputs were approximately balanced), or became either On- or Off- if one  
1033 of the two polarities predominated, thereby simplifying further analysis. However,  
1034 for the same set of reasons, the steps were more suited to investigate the spectral  
1035 differences across On and Off-channels.

1036 **Response Synchronisation.** To determine the degree of response  
1037 synchronisation within each scan, we used the synchrony measurement method  
1038 described in Ref<sup>42</sup>, using the z-normalized fluorescence traces from tetrachromatic  
1039 noise stimulation of the BC data as the input. We first evaluated  $F(t)$  across all the  
1040 recorded terminals within one field of view at a given time  $t$ :  
1041

$$F(t) = \frac{1}{N} \sum_{i=1}^N F_i(t).$$

1042

1043

The variance of the time fluctuations of  $F(t)$  is

1044

$$\sigma_F^2 = \langle [F(t)]^2 \rangle_t - [\langle F(t) \rangle_t]^2$$

1045

Where  $\langle \dots \rangle_t$  denotes the time-averaging over the session. For each terminal  $F_i(t)$ , we used similar approach to calculate the time fluctuations

1046

1047

$$\sigma_{F_i}^2 = \langle [F_i(t)]^2 \rangle_t - [\langle F_i(t) \rangle_t]^2$$

1048

The synchrony measure,  $\chi(N)$ , for the scan filed is then calculated as

$$\chi(N) = \sqrt{\frac{\sigma_F^2}{\frac{1}{N} \sum_{i=1}^N \sigma_{F_i}^2}}$$

1049

1050

The value of  $\chi(N)$  ranges between 0 and 1.  $\chi(N) = 1$  indicates that all ROIs within a scan are perfectly synchronized.

1051

1052

**Clustering of ACs.** Clustering was performed on the dataset containing the functional responses of ACs to chirps, “colour” steps and kernels derived from the colour noise stimulus. All input traces were up-sampled to 1 kHz (cf. pre-processing) which yielded  $n = 25,000$  points (chirp), four times  $n = 4,000$  points (steps) and four times  $n = 1299$  points (kernels). Responses to all three stimuli were used for the clustering.

1053

1054

1055

1056

1057

1058

Regions of interest (ROIs) with low-quality responses to all three stimuli were identified and removed from the data set, ROIs with a high-quality response to at least one stimulus being retained in all cases. The quality of response to the chirp and step stimuli was determined using the signal-to-noise ratio quality index:  $QI = \text{Var}[\langle \mathbf{C} \rangle_r]_t / \langle \text{Var}[\mathbf{C}]_t \rangle_r$ , where  $\mathbf{C}$  is the  $T$  by  $R$  response matrix (time samples by stimulus repetitions), and  $\langle \cdot \rangle_x$  and  $\text{Var}[\cdot]_x$  denote the mean and variance respectively across the indicated dimension,  $x \in \{r, t\}$  (see Ref<sup>68</sup>). A quality threshold of 0.35 was chosen, below which chirp and step responses were judged to be of poor quality. We calculated the standard deviation in the light intensity over time for each stimulus colour in the kernel (R, G, B and UV). The kernel quality of each ROI was defined as the maximum standard deviation across the four colours. A kernel quality threshold of 5 was chosen, below which kernels were judged to be of poor quality. The raw data set was of size  $n = 1776$ . Following quality control, the data set was of size:  $n = 1743$  (98.1% (3 s.f.) of the original).

1059

1060

1061

1062

1063

1064

1065

1066

1067

1068

1069

1070

1071

1072

1073

We scaled the data corresponding to each chirp, step colour and kernel colour by dividing each one by the standard deviation through time and across ROIs. In this way we ensured an even weighting between stimuli.

1074

1075

1076

We used principal component analysis (PCA) to reduce the dimensions of the problem prior to clustering. PCA was performed using the Matlab routine **pca** (default settings). We applied PCA separately to the chirps and to the portions of a data set corresponding to each of the step and kernel colours, retaining the minimum number of principal components necessary to explain  $\geq 99\%$  of the variance. The resulting nine ‘scores’ matrices were then concatenated into a single matrix ready for clustering. The following numbers of principal components were used – chirp: 41; step: 8 R components, 9 G components, 13 B components and

1077

1078

1079

1080

1081

1082

1083



1084 13 UV components; kernels: 7 R components, 16 G components, 31 B  
1085 components and 21 UV components, giving 159 PCA components in total.

1086 We clustered the combined ‘scores’ matrix using Gaussian Mixture Model (GMM)  
1087 clustering, performed using the Matlab routine **fitgmdist**. We clustered the data  
1088 into clusters of sizes 1,2,...,50, using i) shared-diagonal, ii) unshared-diagonal, iii)  
1089 shared-full and iv) unshared-full covariance matrices, such that ( $50 \times 4 =$  ) 200  
1090 different clustering options were explored in total. For each clustering option 20  
1091 replicates were calculated (each with a different set of initial values) and the  
1092 replicate with the largest loglikelihood chosen. A regularisation value of  $10^{-5}$  was  
1093 chosen to ensure that the estimated covariance matrices were positive definite,  
1094 while the maximum number of iterations was set at  $10^4$ . All other **fitgmdist**  
1095 settings were set to their default values.

1096 The optimum clustering was judged to be that which minimised the Bayesian  
1097 information criterion (BIC), which balances the explanatory power of the model  
1098 (loglikelihood) with model complexity (number of parameters). Lastly, clusters with  
1099  $<10$  members were removed.

1100 Using the above procedure, we obtained 23 clusters (1 cluster with  $<10$  members  
1101 was removed), with unshared diagonal covariance matrices providing the optimal  
1102 solution. Finally, we split  $n = 4$  clusters with a notably bimodal IPL distribution into  
1103 their “On-” and “Off-stratifying” components (IPL-cut at 60% depth), yielding a total  
1104 of 27 response groups.

1105 **Sorting BCs and ACs into spectral groups.** Using the computed amplitudes of  
1106 the four kernels (see above), BCs were sorted into one of nine spectral groups (cf.  
1107 [Figure 3A](#)) as follows. First, all BCs that failed to exceed a minimum absolute  
1108 amplitude of 10 SD in at least one of the four kernels was counted as non-  
1109 responsive (group 1). Next, we divided the remaining BCs into non-opponent  
1110 (groups 2-6) and opponent types (groups 7-9) based on the relative signs of all  
1111 four (R, G, B, U) kernels. From here, the two sets of BCs were sorted further as  
1112 follows: *Non-opponent BCs*, in order: Long-biased if  $abs(R+G) > abs(B+U) \times 2$ , Short-  
1113 biased if  $abs(R+G) < abs(B+U)$ , Mid-biased if  $abs(G+B) > abs(R+U) \times 2$ , V-shaped if  
1114  $abs(R+U) > abs(G+B) \times 2$ , else: “Broad”. Opponent BCs; Short-opponent if  $(R+G > 0$   
1115  $\&\& U < 0) \parallel (R+G < 0 \&\& U > 0)$ , Mid-opponent if  $(R > 0 \&\& B < 0) \parallel R < 0 \&\& B > 0$ , Long-  
1116 opponent if  $(R > 0 \&\& G < 0) \parallel (R < 0 \&\& G > 0)$ . Finally, in rare cases where  $(R > 0 \&\&$   
1117  $G < 0 \&\& U > 0) \parallel (R < 0 \&\& G > 0 \&\& U < 0)$ , BCs were allocated as long-opponent if  
1118  $abs(R) > abs(U)$  but as short-opponent if  $abs(R) < abs(U)$ . ACs cluster means were  
1119 sorted by the same set of criteria, with the exception that opponent groups were  
1120 divided into different variants. Specifically, ACs were sorted into the RG:BU and  
1121 R:GBU groups based on the relative signs of G versus U. Note that despite the  
1122 otherwise identical sorting procedure compared to BCs, ACs only fell into 4 groups  
1123 ([Figure 8A-D](#)).

1124 **Fitting of AC-cluster spectral tuning functions with cones.** Spectral tuning  
1125 functions of AC clusters means were matched to those of previously recorded  
1126 cones (cf. [Supplemental Figure 3C,D](#)) based on the four relative kernel amplitudes  
1127 (as shown in [Figure 8A-D](#)). Fitting was done as follows: For each tested cone-  
1128 combination (e.g. all cones, or R+U only, etc.) we computed  $10^6$  possible  
1129 combined tunings at random by summing the respective “reduced” cone tuning  
1130 functions ([Supplemental Figure 3D](#)) with random scaling between -1 and 1 each.  
1131 We then computed the linear correlation coefficient between each AC-cluster’s  
1132 tuning function, and each of the randomly generated combined cone-tunings, in  
1133 each case choosing cone-combination that gave the maximal correlation as the  
1134 best fit. Finally, for each best fit, we scaled all cone weights to minimise the  
1135 residual between the corresponding AC-cluster’s tuning function and that of the  
1136 combined cone-tuning.

1137

1138

1139

## QUANTIFICATION AND STATISTICAL ANALYSIS

1140

**Statistics.** No statistical methods were used to predetermine sample size. Owing to the exploratory nature of our study, we did not use randomization or blinding. Wilcoxon signed-rank tests were used for the following datasets: synchronicity of BC activity (Figure 1H, S1H); weights from ‘white’ steps (Figure 2J); weights from colour steps (Figure 5B); amplitude changes for each colour combination (Figure 5C-F). Wilcoxon rank sum tests were used for the following datasets: green-cone responses between the two conditions (Figure S1K); difference of transient and sustained weights in white steps (Figure S2D). Chi-square tests were used for the following datasets: polarity based on white step stimulation (Figure 2F,H for “all data”, Figure 2I for “paired data”); spectral response types based on kernels (Figure 3A,B for “all data”, Figure 3C for “paired data”); polarity based on colour steps (Figure 5A).

1141

1142

1143

1144

1145

1146

1147

1148

1149

1150

1151

## 1152 REFERENCES

1. Land, M.F., and Nilsson, D.-E. (2012). *Animal Eyes* (Oxford University Press).
2. Sterling, P., and Laughlin, S. (2015). *Principles of neural design* (The MIT Press).
3. Wässle, H. (2004). Parallel processing in the mammalian retina. *Nat. Rev. Neurosci.* 5, 747–57.
4. Baden, T., Euler, T., and Berens, P. (2020). Understanding the retinal basis of vision across species. *Nat. Rev. Neurosci.* 21.
5. Baden, T. (2021). Circuit-mechanisms for colour vision in zebrafish. *Curr. Biol.* 31, PR807-R80.
6. Gollisch, T., and Meister, M. (2009). Review Eye Smarter than Scientists Believed: Neural Computations in Circuits of the Retina. *Neuron* 65, 150–164.
7. Yoshimatsu, T., Bartel, P., Schröder, C., Janiak, F.K., St-Pierre, F., Berens, P., and Baden, T. (2021). Ancestral circuits for vertebrate color vision emerge at the first retinal synapse. *Sci. Adv.* 7, 6815–6828.
8. Simoncelli, E.P., and Olshausen, B.A. (2001). Natural image statistics and neural representation. *Annu Rev Neurosci* 24, 1193–1216.
9. Buchsbaum, G., and Gottschalk, A. (1983). Trichromacy, opponent colours coding and optimum colour information transmission in the retina. *Proc. R. Soc. Lond. B. Biol. Sci.* 220, 89–113.
10. Barlow, H.B.H. (1961). Possible principles underlying the transformation of sensory messages. In *Sensory Communication*, pp. 217–234.
11. Li, Y.N., Tsujimura, T., Kawamura, S., and Dowling, J.E. (2012). Bipolar cell-photoreceptor connectivity in the zebrafish (*Danio rerio*) retina. *J. Comp. Neurol.* 520, 3786–3802.
12. Franke, K., Berens, P., Schubert, T., Bethge, M., Euler, T., and Baden, T. (2017). Inhibition decorrelates visual feature representations in the inner retina. *Nature* 542, 439–444.
13. Franke, K., and Baden, T. (2017). General features of inhibition in the inner retina. *J. Physiol.* 595, 5507–5515.
14. Bartel, P., Yoshimatsu, T., Janiak, F.K., and Baden, T. (2021). Spectral inference reveals principal cone-integration rules of the zebrafish inner retina. *Curr. Biol.* 0.
15. Zimmermann, M.J.Y., Nevala, N.E., Yoshimatsu, T., Osorio, D., Nilsson, D.-E., Berens, P., and Baden, T. (2018). Zebrafish Differentially Process Color across Visual Space to Match Natural Scenes. *Curr. Biol.* 28, 2018-2032.e5.
16. Diamond, J.S. (2017). Inhibitory Interneurons in the Retina: Types, Circuitry, and Function. *Annu. Rev. Vis. Sci.* 3, 1–24.
17. Moya-Díaz, J., James, B., Esposti, F., Johnston, J., and Lagnado, L. (2021). Diurnal modulation of multivesicular release controls the efficiency of information transmission at a sensory synapse. *bioRxiv*, 2021.09.12.459944.
18. Jazdzinsky, P.D., and Baccus, S.A. (2013). Transformation of Visual Signals by Inhibitory Interneurons in Retinal Circuits. *Annu. Rev. Neurosci.* 36, 403–428.
19. Masland, R.H. (2012). The tasks of amacrine cells. *Vis Neurosci* 29, 3–9.
20. MacNeil, M.A., and Masland, R.H. (1998). Extreme diversity among amacrine cells: Implications for function. *Neuron* 20, 971–982.
21. Yan, W., Laboulaye, M.A., Tran, N.M., Whitney, I.E., Benhar, I., and Sanes, J.R. (2020). Mouse Retinal Cell Atlas: Molecular Identification of over Sixty Amacrine Cell Types. *J. Neurosci.* 40, 5177–5195.
22. Behrens, C., Schubert, T., Haverkamp, S., Euler, T., Berens, P., Baden, T., Schubert, T., Chang, L., Wei, T., Zaichuk, M., et al. (2016). Connectivity map of bipolar cells and photoreceptors in the mouse retina. *Elife* 5, 1206–1217.
23. Tanimoto, N., Sothilingam, V., Euler, T., Ruth, P., Seeliger, M.W., and Schubert, T. (2012). BK channels mediate pathway-specific modulation of visual signals in the in vivo mouse retina. *J. Neurosci.* 32, 4861–6.
24. Grimes, W.N., Zhang, J., Graydon, C.W., Kachar, B., and Diamond, J.S. (2010). Retinal parallel processors: more than 100 independent microcircuits operate within a single interneuron. *Neuron* 65, 873–85.
25. Torvund, M.M., Ma, T.S., Connaughton, V.P., Ono, F., and Nelson, R.F. (2017). Cone signals in monostratified and bistratified amacrine cells of adult zebrafish retina. *J. Comp. Neurol.* 525, 1532–1557.
26. Patterson, S.S., Kuchenbecker, J.A., Anderson, J.R., Neitz, M., and Neitz, J. (2020). A Color Vision Circuit for Non-Image-Forming Vision in the Primate Retina. *Curr. Biol.* 30, 1269-1274.e2.
27. Lebedev, D.S., and Marshak, D.W. (2007). Amacrine cell contributions to red-green color opponency in central primate retina: A model study. *Vis. Neurosci.* 24, 535–547.
28. Famiglietti (1983). “Starburst” amacrine cells and cholinergic neurons: mirror-symmetric on and off amacrine cells of rabbit retina. *Brain Res* 261, 138–144.
29. Demb, J.B., and Singer, J.H. (2012). Intrinsic properties and functional circuitry of the All amacrine cell. *Vis. Neurosci.* 29, 51–60.
30. Hsiang, J.C., Johnson, K.P., Madisen, L., Zeng, H., and Kerschensteiner, D. (2017). Local processing in neurites of VGluT3-expressing amacrine cells differentially organizes visual information. *Elife* 6.
31. Antinucci, P., Suleyman, O., Monfries, C., and Hindges, R. (2016). Neural Mechanisms Generating Orientation Selectivity in the Retina. *Curr. Biol.* 26, 1802–1815.

32. Euler, T., Detwiler, P.B., and Denk, W. (2002). Directionally selective calcium signals in dendrites of starburst amacrine cells. *Nature* *418*, 845–852.
33. Baden, T., and Osorio, D. (2019). The Retinal Basis of Vertebrate Color Vision. *Annu. Rev. Vis. Sci.* *5*, 177–200.
34. Dreosti, E., Odermatt, B., Dorostkar, M.M., and Lagnado, L. (2009). A genetically encoded reporter of synaptic activity in vivo. *Nat. Methods* *6*, 883–9.
35. Zimmermann, M.J.Y., Maia Chagas, A., Bartel, P., Pop, S., Prieto-Godino, L.L., and Baden, T. (2020). LED Zappelin: An open source LED controller for arbitrary spectrum visual stimulation and optogenetics during 2-photon imaging. *HardwareX*.
36. Bartel, P., Janiak, F.K., Osorio, D., and Baden, T. (2021). Colourfulness as a possible measure of object proximity in the larval zebrafish brain. *Curr. Biol.* *31*, R235–R236.
37. Zhou, M., Bear, J., Roberts, P.A., Janiak, F.K., Semmelhack, J., Yoshimatsu, T., and Baden, T. (2020). Zebrafish Retinal Ganglion Cells Asymmetrically Encode Spectral and Temporal Information across Visual Space. *Curr. Biol.* *30*, 2927–2942.e7.
38. Johnstone, J., Seibel, S.-H., Darnet, L.S.A., Renninger, S., Orger, M., and Lagnado, L. (2019). A Retinal Circuit Generating a Dynamic Predictive Code for Oriented Features. *Neuron* *102*, 1211–1222.e3.
39. Robles, E., Laurell, E., and Baier, H. (2014). The Retinal Projectome Reveals Brain-Area-Specific Visual Representations Generated by Ganglion Cell Diversity. *Curr. Biol.* *24*, 2085–2096.
40. Baden, T., Nikolaev, A., Esposti, F., Dreosti, E., Odermatt, B., and Lagnado, L. (2014). A Synaptic Mechanism for Temporal Filtering of Visual Signals. *PLoS Biol.* *12*, e1001972.
41. Nirenberg, S., and Meister, M. (1997). THE LIGHT RESPONSE OF RETINAL GANGLION CELLS IS TRUNCATED BY A DISPLACED AMACRINE CIRCUIT. *Neuron* *18*, 637–650.
42. Golomb, D., and Hansel, D. (2000). The number of synaptic inputs and the synchrony of large, sparse neuronal networks. *Neural Comput.* *12*, 1095–1139.
43. Westheimer, G. (2007). The ON-OFF dichotomy in visual processing: From receptors to perception. *Prog. Retin. Eye Res.* *26*, 636–648.
44. Jusuf, P.R., and Harris, W.A. (2009). Ptf1a is expressed transiently in all types of amacrine cells in the embryonic zebrafish retina. *Neural Dev.*
45. Nikolaev, A., Leung, K.-M., Odermatt, B., and Lagnado, L. (2013). Synaptic mechanisms of adaptation and sensitization in the retina. *Nat. Neurosci.* *16*, 934–41.
46. Yoshimatsu, T., Schröder, C., Nevala, N.E., Berens, P., and Baden, T. (2020). Fovea-like Photoreceptor Specializations Underlie Single UV Cone Driven Prey-Capture Behavior in Zebrafish. *Neuron* *107*, 320–337.e6.
47. Packer, O.S., Verweij, J., Li, P.H., Schnapf, J.L., and Dacey, D.M. (2010). Blue-yellow opponency in primate S cone photoreceptors. *J. Neurosci.* *30*, 568–572.
48. Behrens, C., Yadav, S.C., Korympidou, M.M., Zhang, Y., Haverkamp, S., Irsen, S., Schaedler, A., Lu, X., Liu, Z., Lause, J., et al. (2021). Retinal horizontal cells use different synaptic sites for global feedforward and local feedback signaling. *Curr. Biol.*
49. Haverkamp, S., Wässle, H., and Wässle, H. (2004). Characterization of an amacrine cell type of the mammalian retina immunoreactive for vesicular glutamate transporter 3. *J. Comp. Neurol.* *468*, 251–63.
50. Kim, T., Soto, F., and Kerschensteiner, D. (2015). An excitatory amacrine cell detects object motion and provides feature-selective input to ganglion cells in the mouse retina. *Elife* *4*, e08025.
51. Lee, S., Zhang, Y., Chen, M., Zhou, Z.J.J.Z.J., Amthor, F.R., Takahashi, E.S., Oyster, C.W., Chiao, C.C., Masland, R.H., Fremeau, R.T., et al. (2016). Segregated Glycine-Glutamate Co-transmission from vGluT3 Amacrine Cells to Contrast-Suppressed and Contrast-Enhanced Retinal Circuits. *Neuron* *90*, 27–34.
52. Lee, S., Kim, K., and Zhou, Z.J. (2010). Role of ACh-GABA cotransmission in detecting image motion and motion direction. *Neuron* *68*, 1159–72.
53. Euler, T., and Baden, T. (2016). Computational neuroscience: Species-specific motion detectors. *Nature* *535*.
54. Fornetto, C., Tiso, N., Pavone, F.S., and Vanzi, F. (2020). Colored visual stimuli evoke spectrally tuned neuronal responses across the central nervous system of zebrafish larvae. *BMC Biol.* *18*, 1–17.
55. Guggiana Nilo, D.A., Riegler, C., Hübener, M., and Engert, F. (2021). Distributed chromatic processing at the interface between retina and brain in the larval zebrafish. *Curr. Biol.*, S0960-9822(21)00153–6.
56. Nilsson, D.-E. (2021). The Diversity of Eyes and Vision. *Annu. Rev. Vis. Sci.* *7*.
57. Lamb, T.D., Collin, S.P., Pugh, E.N., and Jr (2007). Evolution of the vertebrate eye: Opsins, photoreceptors, retina and eye cup. *Nat. Rev. Neurosci.* *8*, 960–976.
58. Baden, T., Euler, T., and Berens, P. (2020). Understanding the retinal basis of vision across species. *Nat. Rev. Neurosci.* *21*, 5–20.
59. Branchek, T., and Bremiller, R. (1984). The development of photoreceptors in the zebrafish, *Brachydanio rerio*. I. Structure. *J. Comp. Neurol.* *224*, 107–115.
60. Bilotta, J., Saszik, S., and Sutherland, S.E. Rod contributions to the electroretinogram of the dark-adapted developing zebrafish. *Dev. Dyn.* *222*, 564–570.
61. Chapot, C.A., Euler, T., and Schubert, T. (2017). How do horizontal cells ‘talk’ to cone photoreceptors? Different levels of complexity at the cone-horizontal cell synapse. *J. Physiol.* *595*, 5495–5506.
62. Klaassen, L.J., de Graaff, W., Van Asselt, J.B., Klooster, J., and Kamermans, M. (2016). Specific connectivity between photoreceptors and horizontal cells in the zebrafish retina. *J. Neurophysiol.* *116*, 2799–2814.
63. Meier, A., Nelson, R., and Connaughton, V.P. (2018). Color Processing in Zebrafish Retina. *Front. Cell. Neurosci.* *12*, 1–19.
64. Connaughton, V.P., Graham, D., and Nelson, R. (2004). Identification and morphological classification of horizontal, bipolar, and amacrine cells within the zebrafish retina. *J. Comp. Neurol.* *477*, 371–385.
65. Euler, T., Haverkamp, S., Schubert, T., and Baden, T. (2014). Retinal Bipolar Cells: Elementary Building Blocks of Vision. *Nat. Rev. Neurosci.* *15*, 507–519.
66. Euler, T., Hausselet, S.E., Margolis, D.J., Breuninger, T., Castell, X., Detwiler, P.B., and Denk, W. (2009). Eyecup scope—optical recordings of light stimulus-evoked fluorescence signals in the retina. *Pflügers Arch.* *457*, 1393–414.
67. Euler, T., Franke, K., and Baden, T. (2019). Studying a light sensor with light: Multiphoton imaging in the retina. In *Neuromethods*.
68. Baden, T., Berens, P., Franke, K., Roman-Roson, M., Bethge, M., and Euler (2016). The functional diversity of mouse retinal ganglion cells. *Nature*, 1–21.
69. Dorostkar, M.M., Dreosti, E., Odermatt, B., and Lagnado, L. (2010). Computational processing of optical measurements of neuronal and synaptic activity in networks. *J. Neurosci. Methods* *188*, 141–50.
