# Amacrine cells differentially balance zebrafish colour circuits in the central and peripheral retina

Xinwei Wang<sup>1§</sup>, Paul A Roberts<sup>1</sup>, Takeshi Yoshimatsu<sup>1</sup>, Leon Lagnado<sup>1\*§</sup> and Tom Baden<sup>1,2\*§</sup>

**SUMMARY.** In vertebrate vision, the feature-extracting circuits of the inner retina are driven by photoreceptors whose outputs are already pre-processed. In zebrafish, for example, outer retinal circuits split “colour” from “greyscale” information across all four cone-photoreceptor types. How does the inner retina process this incoming spectral information while also combining cone-signals to shape new greyscale functions?

We address this question by imaging the light driven responses of amacrine cells (ACs) and bipolar cells (BCs) in larval zebrafish, in the presence and pharmacological absence of inner retinal inhibition. We find that amacrine cells exert distinct effects on greyscale processing depending on retinal region, as well as contributing to the generation of colour opponency in the central retina. However, in the peripheral retina amacrine cells enhanced opponency in some bipolar cells while at the same time suppressing pre-existing opponency in others, such that the net change in the number of colour-opponent units was essentially zero. To achieve this ‘dynamic balance’ ACs counteracted intrinsic colour opponency of BCs via the On-channel. Consistent with these observations, Off-stratifying ACs were exclusively achromatic, while all colour opponent ACs stratified in the On-sublamina.

This study reveals that the central and peripheral retina of larval zebrafish employ fundamentally distinct inhibitory circuits to control the interaction between greyscale- and colour-processing. Differential actions on the On- and Off-channels control the transmission of colour-opponent signals in the periphery.

---

1, School of Life Sciences, University of Sussex, Biology Road, BN1 9QG, Brighton, UK; 2, Institute of Ophthalmic Research, University of Tübingen, Elfriede-Aulhorn-Strasse 7, 72076, Tübingen, Germany. \*Equal contribution. §Correspondence to [w24@sussex.ac.uk](mailto:w24@sussex.ac.uk) (XW), [l.lagnado@sussex.ac.uk](mailto:l.lagnado@sussex.ac.uk) (LL), [t.baden@sussex.ac.uk](mailto:t.baden@sussex.ac.uk) (TB). Twitter: @XinweiWang1017 (XW), @PAR\_EyeMath (PAR), @TaYoshimatsu (TY), @Neonsynapse (LL), @NeuroFishh (TB)

**Acknowledgements.** We thank Thomas Euler for critical feedback. The authors would also like to acknowledge support from the FENS-Kavli Network of Excellence and the EMBO YIP. Funding was provided by the Wellcome Trust (Investigator Award in Science 220277/Z20/Z to TB and 102905/Z/13/Z to LL), the European Research Council (ERC-StG “NeuroVisEco” 677687 to TB), UKRI (BBSRC, BB/R014817/1 to TB), the Leverhulme Trust (PLP-2017-005 and RPG-2021-026 to TB) and the Lister Institute for Preventive Medicine (to TB).

This research was funded in whole, or in part, by the Wellcome Trust [220277/Z20/Z and 102905/Z/13/Z to LL]. **For the purpose of Open Access, the authors have applied a CC BY public copyright licence to any Author Accepted Manuscript version arising from this submission.**

**Author contributions.** Conceptualization, XW, LL, TB; Methodology, XW, PAR, TY; Investigation, XW, PAR; Data Curation, XW, TB; Writing – Original Draft, TB; Writing – Review & Editing, XW, PAR, TY, LL, TB; Visualization, XW, TB; Supervision, LL, TB; Project Administration, LL, TB; Funding Acquisition, LL, TB. The authors declare no conflict of interest.

54  
55  
56  
57  
58  
59  
60  
61  
62  
63  
64  
65  
66  
67  
68  
69  
70  
71  
72  
73  
74  
75  
76  
77  
78  
79  
80  
81  
82  
83  
84  
85  
86  
87  
88  
89  
90  
91  
92  
93  
94  
95  
96  
97  
98  
99  
100  
101

## INTRODUCTION

Animal eyes encode patterns of light along distinct axes of variation such as space, time and “colour”<sup>1</sup>. These axes combine signals from a shared population of photoreceptors, which poses a general question in neural circuit organisation: how can a common set of inputs be processed such that specialisation for one task does not simultaneously deteriorate function elsewhere?

One strategy is to split the neural signal down separate microcircuits that implement different processing tasks. Such parallel processing is fundamental to brain function<sup>2</sup>, including in the vertebrate retina<sup>3,4</sup>, where stimulus-response relationships become increasingly specific and diverse as the visual signal travels from photoreceptors via bipolar cells (BCs) to retinal ganglion cells (RGCs). Based on this architecture, progressive circuit specialisation for distinct tasks can then take place in different populations of inner retinal neurons. A key question then is: at what stage in the retinal circuit does specialisation for each processing task occur? Specialisation for one task may precede specialisation for others. In teleost fish, for example, spectral coding in the outer retina<sup>5</sup> precedes the extraction of key spatiotemporal features of the inner retina<sup>6</sup>.

In larval zebrafish, splitting of “colour” and “brightness” signals begins in the outer retina, where the cone-photoreceptors are modulated by horizontal cells at the first synapse in vision<sup>7</sup>. Red-cones provide an output that signals brightness and is essentially colour-invariant, while green-cones provide a primary colour output that is brightness-invariant. Further, blue- and UV-cones provide secondary colour and brightness channels, respectively. Such parallel representation<sup>7-10</sup> of spectral information is beneficial for colour vision<sup>11</sup>, but how can it be maintained through the dense interconnectedness of inner retinal circuits<sup>12-14</sup>? All the various processing channels evident in the retinal output involve amacrine cells (ACs) in the inner retina that modify the visual signal by inhibition through both GABA- and glycinergic transmission alongside a variety of neuromodulators that can either inhibit or potentiate transmission<sup>14-17</sup>. How do these operations on the visual signal in the inner retina adjust the results of spectral processing arriving from the outer retina? Distinct types of BC do represent the spectral inputs from each of the four cone-signals in isolation, but alongside them are a plethora of other BCs that represent diverse cone-mixtures, presumably specialized for other temporal and spatial processing tasks<sup>18,19</sup>.

ACs are the most diverse yet least understood class of neurons in the retina<sup>6,20,21</sup>. In mice, transcriptomic analysis revealed 63 molecularly distinct types of ACs<sup>22</sup>, while in zebrafish, >20 can be defined by anatomy<sup>12</sup>. General roles of ACs include the shaping of BC and RGC receptive field structures<sup>14,20</sup>, modulating their dynamic range<sup>23,24</sup> and adaptive properties to generate the functional diversity of the retinal output<sup>13,25,26</sup>. Although the specific functions of most AC-types across any

102 species remains unknown, we might expect ACs to contribute to both  
103 chromatic and achromatic signalling<sup>27–29</sup>. To test if this is the case, we  
104 surveyed light-driven signals of ACs *in vivo* across different eye regions of  
105 the zebrafish retina. Surprisingly, this revealed that despite being highly  
106 diverse – for example in terms of kinetics and polarity - ACs were mostly  
107 non-opponent and spectrally resembled linear combinations of UV- and  
108 red-cone signals, which in zebrafish are associated with greyscale  
109 processing<sup>7</sup>. Next, we imaged BC light responses in the presence and  
110 absence of AC-mediated inhibition. This demonstrated that while BC  
111 greyscale processing was profoundly altered across the entire retina,  
112 colour processing was affected differently in different regions of the retina.  
113 While in the central retina ACs served to set up a new “UV:yellow” axis of  
114 colour opponency, in the peripheral retina the population representation of  
115 spectral contrast<sup>5,30</sup> was essentially invariant to the removal of inhibitory  
116 signals. However, this was not because opponency in individual BCs was  
117 invariant to AC-block. On the contrary: ACs both routinely abolished and  
118 generated spectral opponency at the level of individual BCs, but they did  
119 so in approximately equal measure, such that the net change across the  
120 population of BCs was essentially zero. To preserve the balance between  
121 different chromatic and achromatic channels, ACs act near-exclusively  
122 through On-circuits.

123  
124 We conclude that distinct circuits serve to conserve the parsing of colour  
125 information performed in the outer retina as the visual signal is transmitted  
126 to central and peripheral BCs. The inhibitory interactions within the inner  
127 retina that underly other visual processing tasks do not notably alter the  
128 population representation of colour information.

## 129 130 **RESULTS**

### 131 132 ***Surveying amacrine cell functions***

133 To investigate how inhibitory microcircuits in the inner retina contribute to  
134 processing we began by recording how the population of amacrine cells  
135 (ACs) in larval zebrafish encode greyscale and colour information across  
136 the inner plexiform layer (IPL) and across different parts of the eye. For  
137 this, we used *in vivo* 2-photon imaging of SyGCaMP3.5 expressed under  
138 the ptf1a promoter which targets the vast majority of ACs in zebrafish<sup>25,31</sup>  
139 (Figure 1A-F). We recorded dendritic calcium responses of ACs to a  
140 battery of widefield light stimuli testing basic visual processing tasks  
141 (Methods): (i) an achromatic (“white”) step of light (3 s On, 3 s Off, 100%  
142 contrast) testing response polarity and kinetics (Figure 1D); ii) a frequency  
143 modulated chirp centred at 50% contrast testing frequency response  
144 (Figure 1D), (iii) steps of light (2 s On, 2 s Off, 100% contrast) at four  
145 different wavelengths (‘red’: 592 nm; ‘green’: 487 nm; ‘blue’: 420 nm; ‘UV’  
146 382 nm) testing spectral sensitivity (Figure 1E) and (iv) ‘tetrachromatic  
147 binary noise’ (5 mins, 6.4 Hz, 100% contrast) which allowed us to extract  
148 four ‘spectral sensitivity kernels’ per terminal to probe for spectral  
149 opponency (Figure 1F, Methods).

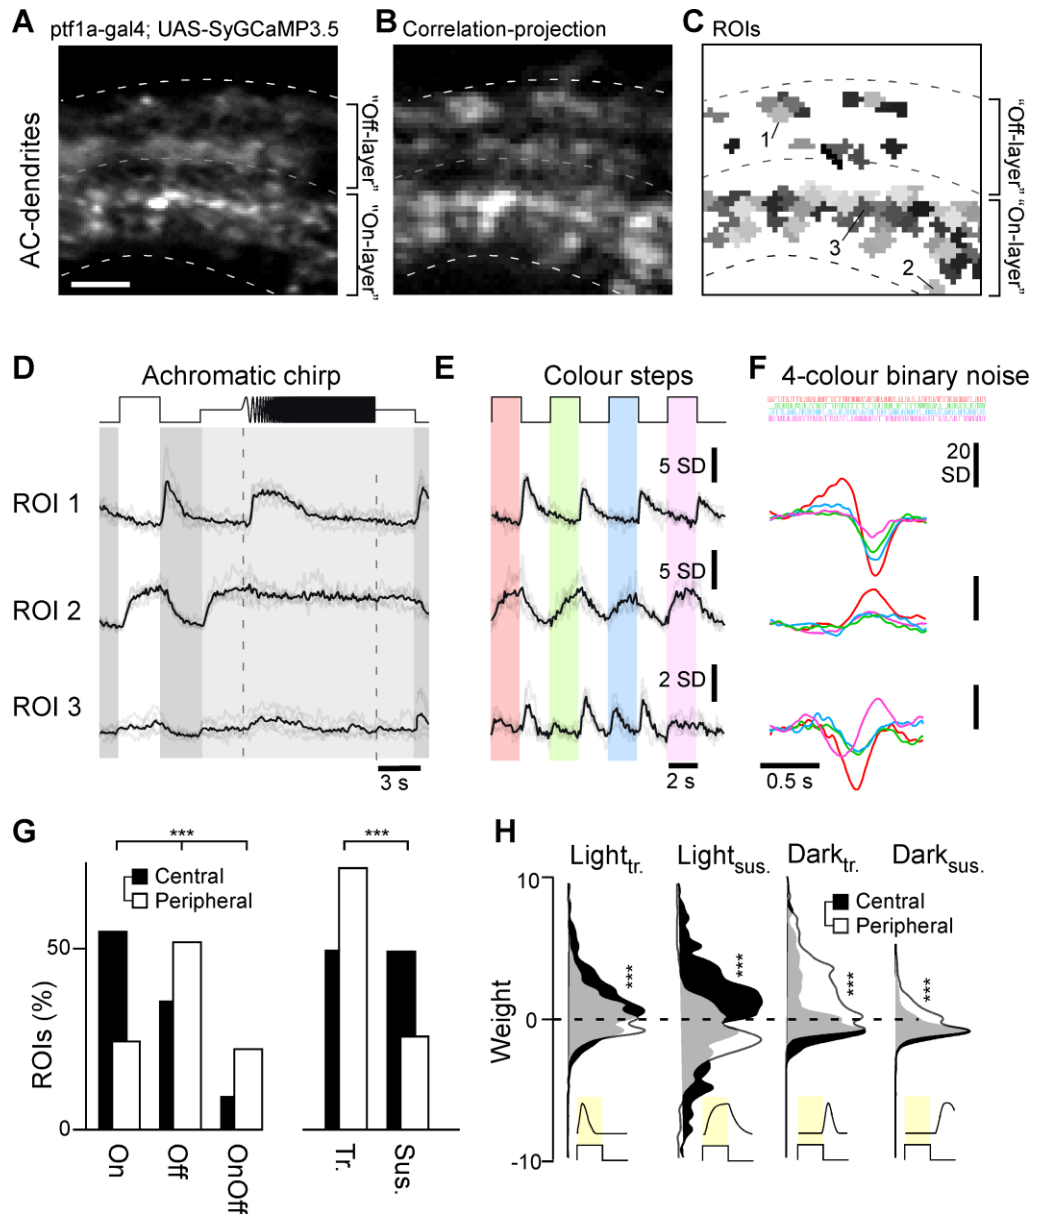

**Figure 1 – Recording AC-functions in vivo.** **A-C**, Example scan of syGCaMP3.5 expressing AC-dendrites within the IPL, showing the scan average (A), a projection of local response correlation, indicating regions of high activity (B) and the correspondingly placed ROI-map (C). **D-F**, Example ROIs (cf. C), with mean trial-averages (black) superimposed on individual repeats (grey) to the three light stimuli tested: an achromatic chirp stimulus (D), four spectrally distinct steps of light from dark (red, green, blue, UV, as indicated, Methods) (E) and a spectral noise stimulus used to establish linear filters (kernels) at the same four wavelengths (F). **G**, Distribution of ROIs from the central (black,  $n = 927$  ROIs, 10 scans, 6 fish) and peripheral retina (white,  $n = 816$  ROIs, 10 scans, 6 fish) by polarity (On/Off/On-Off) and kinetics (transient/sustained). Chi-squared test,  $p < 0.001$  for both datasets. **H**, Distribution of kinetic component weights (Methods, cf. Supplemental Figure S1B) of central and peripheral ROIs. Wilcoxon Rank Sum test,  $p < 0.001$  for all four datasets.

This set of stimuli was chosen to facilitate comparison with previous work<sup>7,13,19,32,33</sup>, and to test a wide range of achromatic and spectral processing tasks within a limited recording time. We recorded from two regions of the eye: (i) the central ‘fovea like’ *area temporalis* which surveys upper frontal visual space to support binocular vision and including prey capture<sup>19,34–38</sup>, and (ii) the peripheral nasal retina, which surveys the outward horizon ( $n = 10$  scans each). ROIs were detected at all IPL

170 depths, with most AC-responses occurring in two major bands, towards the  
 171 respective centres of the traditional On- and Off-layers (Supplemental  
 172 Figure S1A). In total, we recorded from n=927 ROIs in the central retina  
 173 and n=816 ROIs from the peripheral retina.

174

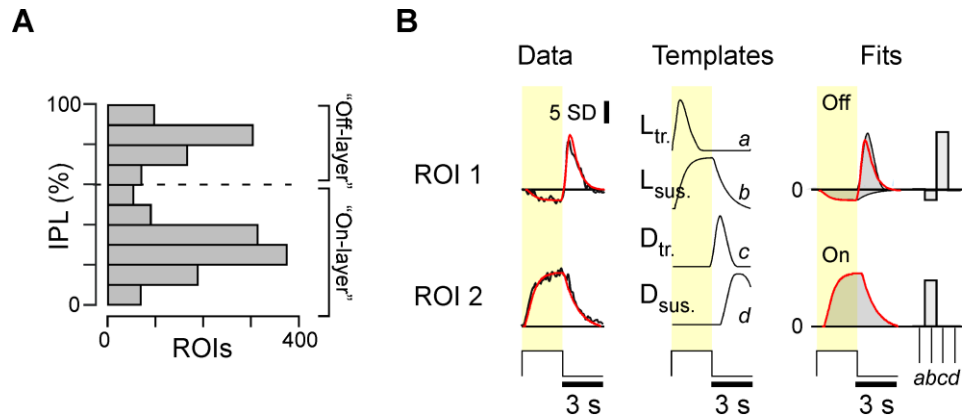

175

176 **Supplemental Figure S1 – related to Figure 1. A**, distribution of all AC-ROIs across the IPL. **B**,  
 177 Kinetic template-fitting approach (Methods) illustrated using the white-step responses of example  
 178 ROIs 1 and 2 (Figure 1D). Left: Response means (black) shown with the fit superimposed (red).  
 179 Middle: Four kinetic templates are used for fitting: Light-transient, Light-sustained, Dark-transient, and  
 180 Dark-sustained. Right: scaled kinetic components used to fit the two example ROIs (grey) with their  
 181 sum superimposed (red), and corresponding component weights (bars).

182

183 AC processes exhibited diverse responses across the tested battery of  
 184 stimuli (Figure 1D-F). ROI 1, for example, consistently exhibited transient  
 185 Off-responses to both the white chirp stimulus (Figure 1D) and when  
 186 probed with colour flashes (Figure 1E), while ROI 2 exhibited sustained  
 187 On-responses. These different behaviours were also captured by the  
 188 spectral kernels (Figure 1F), which additionally highlighted an overall  
 189 preference for long- over short-wavelength stimulation in both cases. In  
 190 contrast, ROI 3 responded poorly to the ‘white’ chirp but exhibited a variety  
 191 of both On- and Off-responses to different wavelength colour flashes. In  
 192 this case, the spectral kernels indicated a gradual shift from long-  
 193 wavelength Off-dominance to short wavelength On-dominance, identifying  
 194 this ROI as colour-opponent.

195

196 **Variations in amacrine cell function in the central and peripheral**  
 197 **retina.**

198 The larval zebrafish retina is structurally and functionally asymmetrical to  
 199 acknowledge statistical symmetries in the natural visual world as well as  
 200 species specific visual demands<sup>19,34,35,39,40</sup>. For example, the central retina  
 201 comprises a high density of UV-On circuits to support prey capture<sup>19,33,34,41</sup>,  
 202 while the nasal and dorsal parts of the eye disproportionately invest in  
 203 colour-opponent circuits<sup>18,19</sup> to survey the colour-rich horizon and lower  
 204 visual field, respectively. To evaluate how ACs might contribute to regional  
 205 differences in the distribution of functional microcircuits, we began by  
 206 analysing responses to the white step of light, fitting these to a linear  
 207 kinetic model as described in recent work<sup>18</sup>. Briefly, the model used four  
 208 kinetic templates to capture the dominant response waveforms across our

209 datasets: Light-transient, Light-sustained, Dark-transient, and Dark-  
210 sustained (Supplemental Figure S1B, Methods). This procedure simplified  
211 complex responses into four components and their corresponding weights.  
212 For example, ROI 2 (Figure 1D) exhibited a relatively slow On-response  
213 that was readily captured by a positively weighted Light-sustained  
214 component alone (Supplemental Figure S1B, bottom). The Off-response of  
215 ROI 1 was kinetically more complex. Capturing this compound waveform  
216 required the combined use of a small negatively weighted Light-sustained  
217 component alongside a large positively weighted Dark-transient  
218 component (Supplemental Figure S1B, top). The same approach served to  
219 fit all ACs achromatic step-responses, consistently capturing >93% of the  
220 variance across response means.

221  
222 The extracted component weights allowed us to quantitatively compare the  
223 distribution and types of responses across the central and peripheral retina  
224 based on two fundamental properties – polarity (On, Off, On-Off) and  
225 kinetics (transient, sustained, Figure 1G, Methods). The central retina was  
226 On-dominated (54.5% of ROIs, compared to 35.6% Off and 9.4% On-Off  
227 ROIs), while the peripheral retina was Off-dominated (51.7% of ROIs,  
228 compared to 24.5% and 22.4% of On and On-Off ROIs, respectively; 1.4%  
229 non-responders). Moreover, while the central retina comprised  
230 approximately equal fractions of transient (49.8%) and sustained (49.5%)  
231 responses, the peripheral retina was heavily dominated by transient  
232 (72.6%) responses. Further insights emerged by comparing the  
233 distributions of kinetic component weights across retinal regions (Figure  
234 1H). Central ACs were dominated by large positive and negative Light-  
235 sustained weights, alongside a smaller contribution from positive Light-  
236 transient weights. In contrast, peripheral ACs drew on a more varied  
237 distribution of kinetic components, and with a particular emphasis on the  
238 use of positive Dark-transient weights. ACs from the two retinal regions  
239 therefore exhibited a variety of responses to a simple achromatic step of  
240 light.

241  
242 We next sorted ACs into response types based on the full range of stimuli  
243 by using a Mixture of Gaussians model to jointly cluster all ROIs,  
244 irrespective of IPL position or eye region (Methods). This returned 27  
245 clusters which further highlighted the striking functional differences in AC  
246 functions across the eye (Example clusters shown in Figure 2A-E,  
247 complete overview in Supplemental Figure S2 and Supplemental Figure  
248 S2 Extended 1). Regional information was not used to drive the clustering  
249 (see Supplemental Figure S2 Extended 2 for an alternative clustering by  
250 eye region) but 20 of the 27 clusters nonetheless comprised ROIs  
251 exclusively from either the central or the peripheral retina. The remaining  
252 seven clusters comprised various mixtures of ROIs from both regions.

253  
254  
255  
256

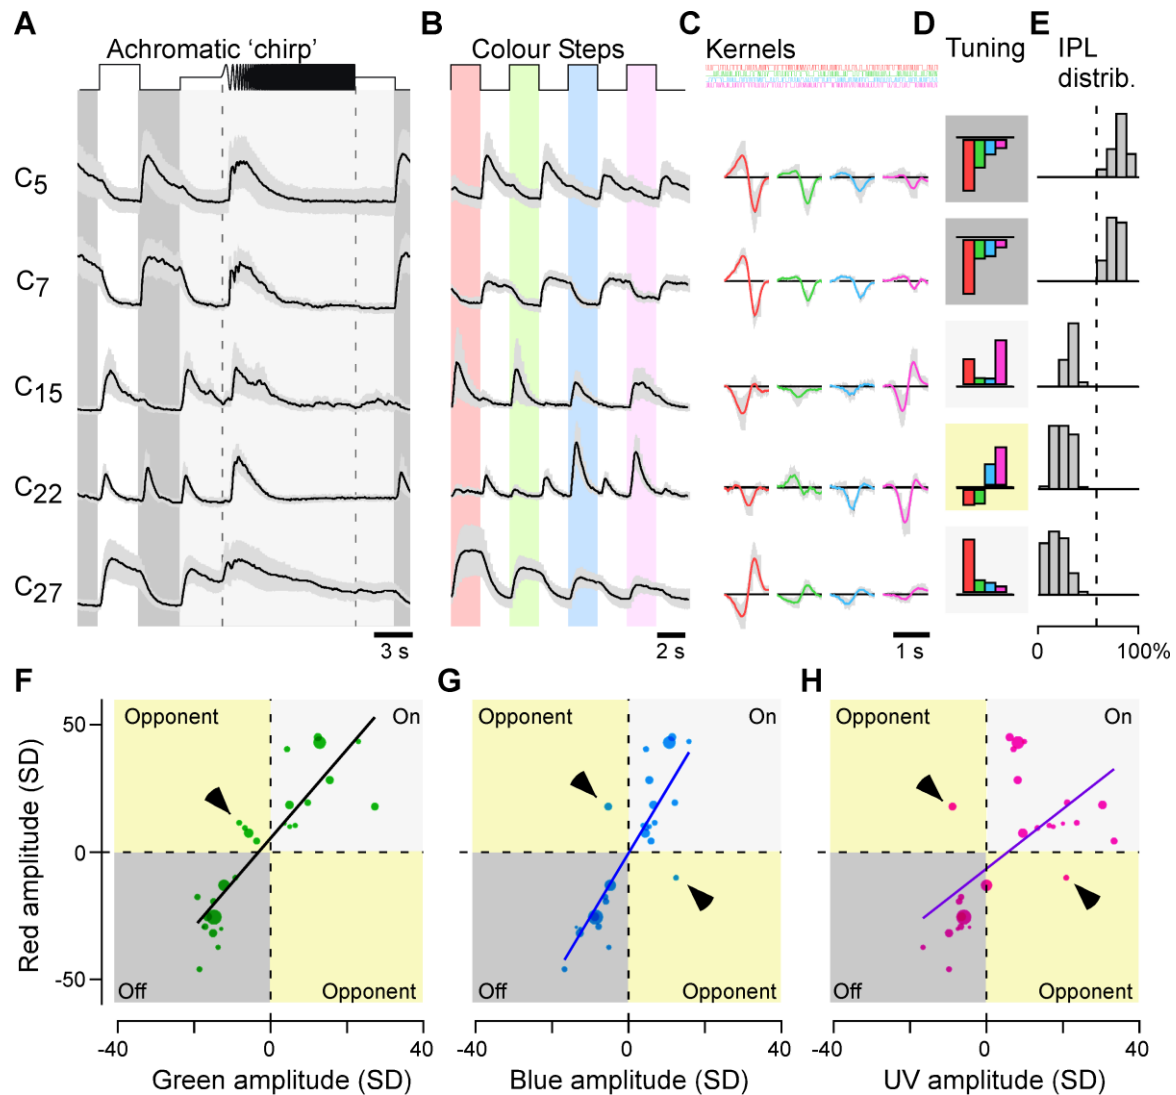

257  
258  
259  
260  
261  
262  
263  
264  
265  
266  
267  
268  
269  
270  
271  
272  
273  
274  
275  
276  
277  
278

**Figure 2 – Amacrine cells are kinetically diverse but spectrally simple.** **A-E**, Example cluster means $\pm$ SD in response to the white chirp (A) and colour-step stimuli (B), spectral kernels (C) corresponding mean kernel amplitudes (D), and each cluster's distribution across the IPL (E). Shadings in (D) annotate cluster polarity (dark: Off; light: On, yellow: colour-opponent). **D-H**, Relationship of each cluster's kernel amplitudes in red (y-axis) plotted against the corresponding amplitudes in green (F), blue (G) and UV (H). Note that most points scatter across the two non-opponent quadrants of the plots, with exceptions highlighted by arrowheads. Dot size indicates the number of ROIs in a cluster. Non-weighted line-fits are superimposed for illustration.

### **Amacrine cells are kinetically diverse but spectrally simple**

Using the output of the joint clustering procedure, we compared how ACs encode greyscale and colour information. As we detail below, this revealed that ACs could be divided into two main spectral groups: a majority of kinetically diverse but spectrally simple achromatic ACs, and a minority of colour-opponent ACs with complex spectral responses, which stratified exclusively in the On-layer.

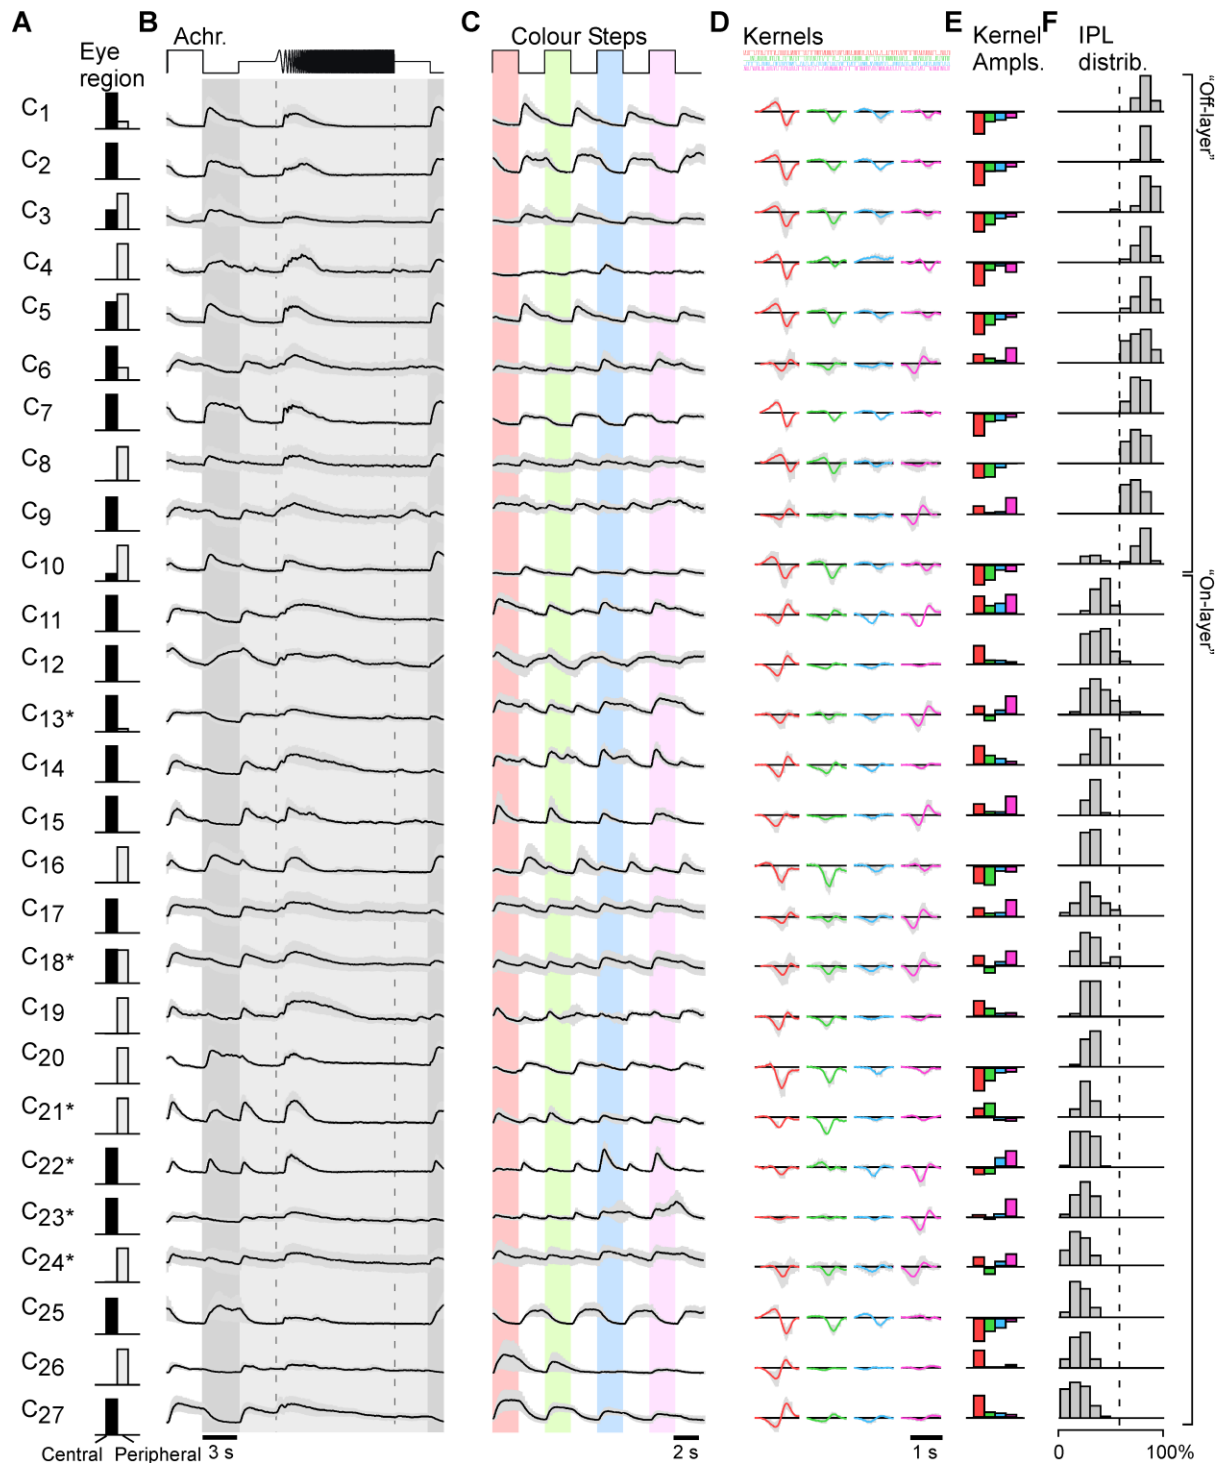

279

280

281

282

283

284

285

286

287

288

289

290

**Supplemental Figure S2 – related to Figure 2.** Full cluster overview of ACs. Shown are the eye region of the included ROIs (A, Central / Peripheral), as well as the mean±SD of chirps (B), colour-steps (C), Kernels (D), mean kernel amplitudes (E) and IPL distribution of included ROIs normalised to the population of all recorded ROIs (cf. Supplemental Figure S1A).

21 of the 27 clusters responded similarly to the white and coloured steps of light (Figure 2A,B), a behaviour that was also captured in the spectral kernels (Figure 2C,D). For example, cluster C<sub>5</sub> exhibited transient Off-responses to steps of light at any wavelength, while cluster C<sub>7</sub> consistently displayed sustained Off-responses. Correspondingly, each of the four



291 spectral kernels also indicated Off-behaviour (Figure 2C), rendering these  
 292 clusters non-opponent. Similarly, kinetically distinct On-clusters  $C_{15}$  and  $C_{27}$   
 293 were also non-opponent. The remaining six clusters were more complex.  
 294 For example,  $C_{22}$  displayed transient On-Off responses at all tested  
 295 wavelengths, however with a notable Off-dominance during long-  
 296 wavelength stimulation and On-dominance during short-wavelength  
 297 stimulation, rendering this cluster colour-opponent overall. Such  
 298 wavelength-dependent rebalancing of On- versus Off- amplitudes – rather  
 299 than a ‘classical’ full polarity reversal as observed in cones<sup>7</sup> and bipolar  
 300 cells<sup>18,19</sup> – also rendered the remaining five clusters weakly opponent  
 301 overall.

303 The dominance of non-opponent responses amongst AC-clusters was  
 304 further illustrated by comparison of kernel amplitudes across different  
 305 wavelengths (Figure 2F-H). For example, pairwise comparison of red-  
 306 versus green-kernel amplitudes highlighted that most clusters exhibited  
 307 same-sign behaviour at both wavelengths (Figure 2F). Only a minority  
 308 were red-green opponent (arrowhead), and these clusters notably also  
 309 exhibited the lowest kernel amplitudes overall. Qualitatively similar  
 310 behaviour was observed when comparing red-blue and red-UV  
 311 wavelengths (Figure 2G,H).

312

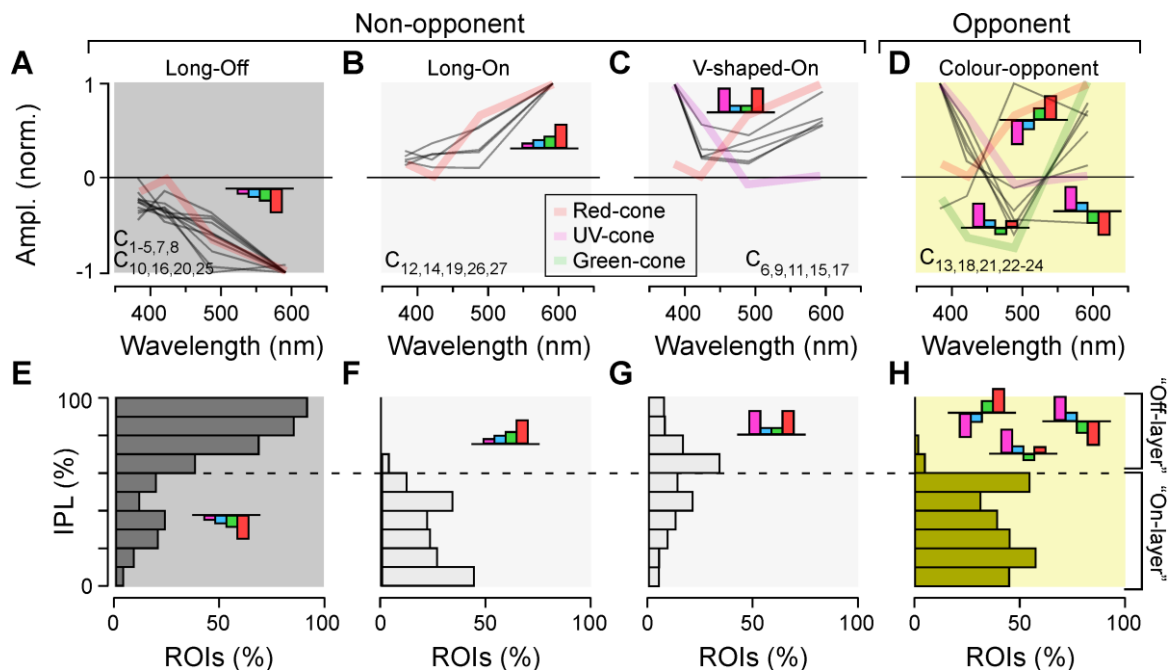

313

314

315 **Figure 3 – Amacrine cells are kinetically diverse but spectrally simple.** A-D, Spectral tuning  
 316 functions of all AC-clusters (grey lines), allocated to one of four groups as shown: Long-wavelength  
 317 biased Off- (A) and On- (B), V-shaped-On (C), and colour-opponent (D). Plotted behind the AC-  
 318 spectral tunings are reduced tuning functions of selected cones (cf. Supplemental Figure S3B,C) to  
 319 illustrate qualitative spectral matches between cones and AC-clusters. Clusters contributing to each  
 320 group are listed in each panel. E,H, Corresponding IPL-distribution of AC-ROIs allocated to each of  
 321 the four spectral groups, as indicated.

322

323

324 The 27 AC-clusters could be sorted into four spectral groups (Methods):  
 325 Three large non-opponent groups (Off-long biased:  $C_{1-5,7,8,10,16,20,25}$ ; On-  
 326 long-biased:  $C_{12,14,19,26,27}$ ; “V-shaped”:  $C_{6,9,11,15,17}$ ) and one opponent  
 327 (RG/BU:  $C_{21,22}$ ; RBU/G:  $C_{13,18,23,24}$ ) (Figure 3A-D). This simplification  
 328 illustrated their remarkable spectral homogeneity, and further facilitated  
 329 summarising their distributions across the IPL (Figure 3E-H): All eleven  
 330 Off-clusters, as well as five of the ten On-clusters followed a common,  
 331 long-wavelength biased and non-opponent spectral tuning function (Figure  
 332 3A,B). Off-long-biased ROIs were mostly, though not exclusively located in  
 333 the IPL’s traditional Off-layer (Figure 3E), while On-long-biased ROIs were  
 334 only found in the On-layer (Figure 3F).  
 335

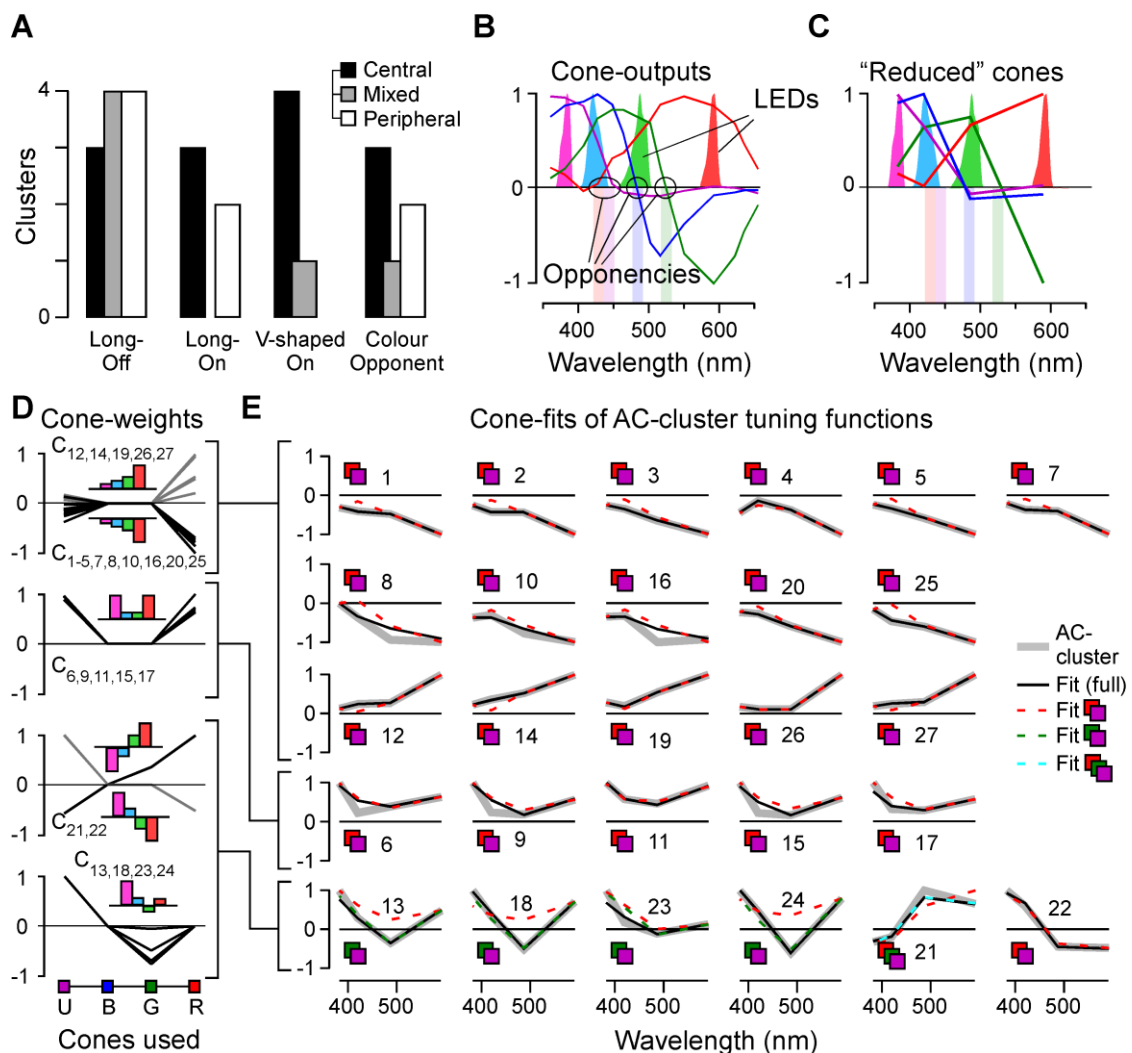

336  
 337  
 338 **Supplemental Figure S3 – related to Figure 3.** **A**, Distribution of AC-clusters across the four  
 339 spectral groups (cf. Figure 3A-D), divided by retinal location: Central (black), Peripheral (white) and  
 340 mixed (grey). **B**, Spectral relationship of cone-photoreceptor outputs (thin lines, based on Ref<sup>7</sup>), their  
 341 spectral zero crossings (shaded bars, labelled “opponencies”), and the spectra of the four LEDs used  
 342 to probe ACs and BCs in the present study (solid curves). Note that the spectral zero crossings of  
 343 blue-cones coincides with the bulk of the spectral power of the green-LED. **C**, Reduced spectral  
 344 tuning functions of the cone outputs as they would appear if probed with the four LEDs used in the  
 345 present study. Note that the specific LED placement resulted in an under sampling of the full blue-  
 346 cone opponency. **D,E**, Cone-weights (D) and overview of fits (E) between spectral tuning functions of  
 347 reduced cones (see above) and AC-cluster means. The four plots in (D) part-correspond to the four

348 spectral groups shown in [Figure 3A-D](#), however with On- and Off versions of long-wavelength biased  
349 clusters combined (D, top), while the five colour-opponent clusters were further subdivided into two  
350 separate groups as shown (D, bottom). (E) shows one panel per cluster as indicated, sorted by  
351 spectral groups. Shown are: AC-cluster mean (grey, thick), the best fit when using all four cones  
352 (black) and the fit result when only using red- and UV-cones (red, dashed). We also show the fit  
353 results for the six opponent clusters (bottom row) when using only green- and UV-cones (green,  
354 dashed) and when using red-, green- and UV-cones (light blue, dashed). For quantitative evaluation  
355 of fits, see *Methods*.

356

357

358

359

360

361

362

363

364

365

366

367

368

369

370

371

372

373

374

375

376

377

378

379

380

381

382

383

384

385

386

387

388

389

390

391

392

393

394

395

396

All remaining non-opponent On-clusters fell into a third group that was spectrally “V-shaped” ([Figure 3C](#)), with ROIs exhibiting an incomplete bias to the centre of the IPL. This last group was overwhelmingly comprised of ROIs from the central retina ([Supplemental Figure S3A](#)) which is known to be heavily UV-dominated<sup>18,19,33,34</sup>. The spectral tuning of all 21 non-opponent ACs clusters was readily explained by inputs from red- and UV-cones ([Supplemental Figure S3B-E](#)), which are associated with achromatic processing<sup>7</sup>. Strikingly, essentially all ROIs in the Off-layer and approximately half in the On-layer were of this non-opponent population. The remaining half of ROIs in the On-layer consisted of six AC clusters that were both kinetically and spectrally complex, and weakly but consistently colour opponent ([Figure 3D,H](#)). The spectral behaviour of these colour-opponent clusters could not generally be explained without additional inputs from the opponent<sup>7</sup> green-cones which are associated with colour processing ([Supplemental Figure S3B-E](#)).

We next tested how these different distributions of amacrine cell functions across the eye and IPL might be linked to spectral and temporal processing in bipolar cells.

### ***Bipolar cell signalling in the presence and absence of inhibition from amacrine cells.***

To investigate the effects of AC-mediated inhibition on the visual signal transmitted through the inner retina, we combined pharmacology with *in vivo* 2P imaging of BC synaptic terminals expressing the calcium biosensor SyjGCaMP8m<sup>18,42–44</sup> ([Figure 4A-F](#), *Methods*). In each experiment, we first scanned ~10° eye regions comprising typically 100-120 individual BC terminals ([Figure 4A,B](#)) and presented the same battery of stimuli previously used to characterise amacrine cells ([Figure 4C-E](#)). Next, we injected a cocktail of gabazine, TPMPA, and strychnine into the eye to pharmacologically block GABA<sub>A</sub>, GABA<sub>C</sub> and glycine receptors, respectively<sup>26</sup> (*Methods*), which represent the major known sources of AC-mediated inhibition in the inner retina<sup>15</sup>. We then imaged the inner retina a second time (e.g. [Figure 4F-H](#)) to compare the functions of BC terminals in the presence or pharmacological absence of AC-mediated inhibition.

The efficacy with which this manipulation blocked inhibition in the inner retina was evidenced by the increase in the gain of responses in BC synapses ([Figure 5](#), [Supplemental Video 1](#)) and the decorrelation<sup>13</sup> of these responses ([Supplemental Figure S4A,B](#)). We also evaluated the

397  
398  
399  
400  
401

effect of blocking inhibitory receptors on outer retinal function, where horizontal cells spectrally retune the cone output<sup>7</sup>. Using existing cone-type specific SyjCaMP6f lines<sup>7</sup>, we confirmed that the cones' spectral tunings were invariant to the application of the drug-cocktail (Supplemental Figure S4C-N).

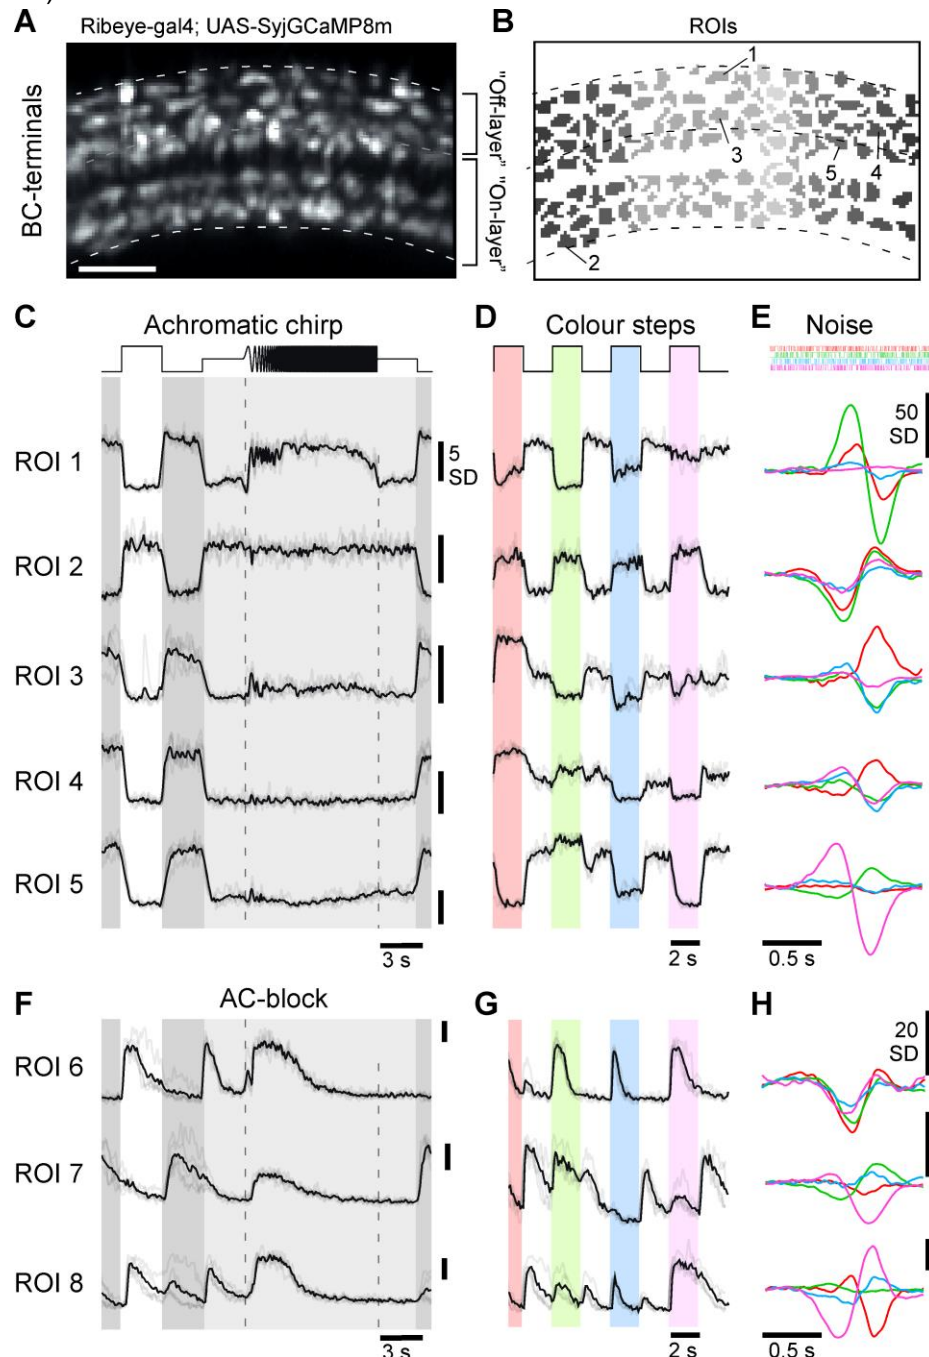

402  
403  
404  
405  
406  
407  
408  
409  
410  
411  
412

**Figure 4 – Effects of AC-blockage on BCs.** **A**, Example scan field (A) and ROI-mask (B) of a typical scan from BC-terminals expressing SyjCaMP8m<sup>44,62</sup>, with approximate IPL-boundaries and On/Off layer separation indicated. Scalebar: 5  $\mu$ m. **C-E**, Example ROIs from (A,B) as indicated, responding to the white chirp (C) and colour-steps (D), alongside mean spectral kernels recovered from 4-colour noise stimulation (E). **F-H**, (As C-E, respectively), but for three different example terminals that were recorded after pharmacological injections of GABAzine, TPMPA and strychnine to block inhibitory inputs from ACs. Note that responses are generally larger and more transient compared to control conditions, but diverse spectral opponencies persist. Scalebars (C,D,F,G): 5 SD, (E): 50 SD, (H): 20 SD.

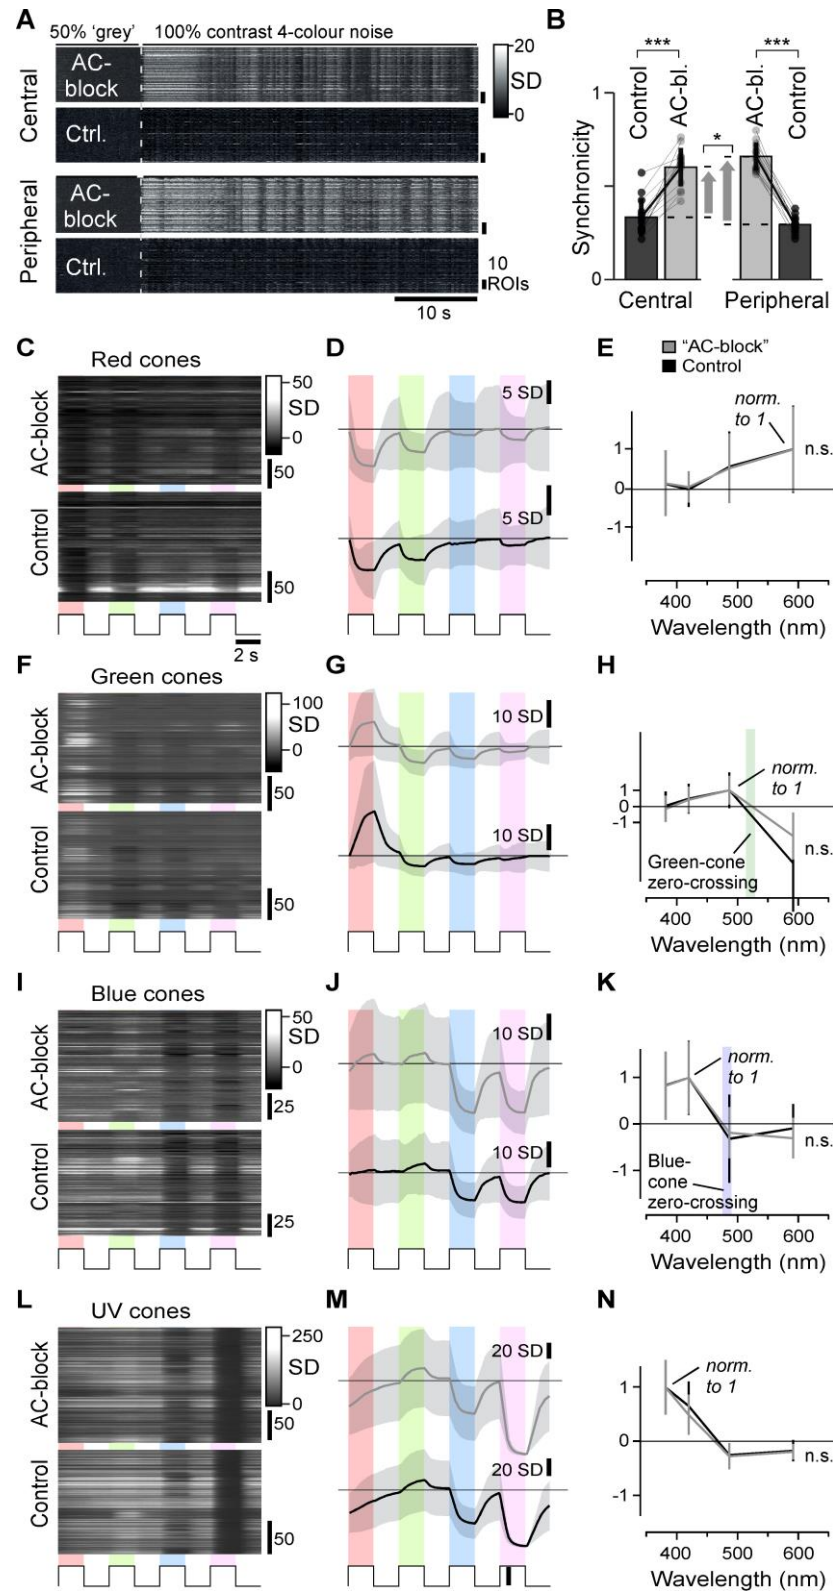

413  
 414

415 **Supplemental Figure S4 – related to Figure 4.** **A,B**, comparison of population synchronicity during  
 416 spectral noise stimulation. Heatmaps show the first 60 s of the z-normalised responses example  
 417 scans during control conditions and following AC-block, as indicated, for the central retina (top two  
 418 rows) and the peripheral retina (bottom two rows). Population synchronicity (**B**) was computed as in  
 419 Ref<sup>63</sup>. Wilcoxon Signed-Rank test: Central:  $p < 0.001$ ; Peripheral:  $p < 0.001$ ; Difference in change  
 420 between central and peripheral:  $p = 0.017$ . **C-N**, No effect of drug-cocktail injection as in **Figure 4** on  
 421 spectral tuning including opponency in cones. Heatmaps (**C**) of SyGCaMP6f responses in red cone

422 terminals to the four steps of light as [Figure 4D](#) based on previously established protocols<sup>7</sup> before  
423 (bottom) and after drug injection (top), the same data summarised with mean $\pm$ 1SD shading (D) and  
424 extracted response amplitudes $\pm$ 1SD plotted against stimulus wavelength, with each curve's peak  
425 hyperpolarising response normalised to 1 (E). **F-N**, as (C-E), but for green (F-H), blue- (I-K) and UV-  
426 cones (L-N), respectively. The coloured shadings in H and K indicates the spectral position of the  
427 green- and blue-cones' zero-crossings, respectively, from Ref<sup>7</sup>. Wilcoxon rank sum tests were used  
428 for comparing amplitude-normalized tuning functions,  $p > 0.05$  for all the four types.

429

430 In line with previous work<sup>18,19,45</sup> BCs displayed a broad range of response  
431 properties under control conditions, which included both On- and Off cells  
432 with diverse temporal and spectral tunings. For example, in a scan from the  
433 peripheral retina ([Figures 4A,B](#)) ROIs 1 and 2 displayed largely achromatic  
434 Off- and On-responses, respectively, while ROIs 3-5 exemplified different  
435 forms of colour opponency ([Figure 4C-E](#), [Supplemental Video 2](#)). A  
436 substantial degree of functional diversity in BC-responses was also  
437 observed following pharmacological AC-block, including the continued  
438 presence of numerous colour opponent responses ([Figure 4F-H](#)).  
439 However, the nature and distribution of these disinhibited responses were  
440 profoundly altered compared to control conditions, and in a manner that  
441 systematically differed between the central and peripheral retina, as we  
442 describe below.

443

#### 444 **Changes in greyscale processing caused by blocking inhibition**

445 The most general effects of blocking inhibition from ACs were to make  
446 responses in BCs larger and more transient, and this occurred across  
447 retinal regions and for terminals of all polarities ([Figure 5](#)). By fitting step  
448 responses to the same four kinetic components previously used to fit ACs  
449 we could account for >94% of the variance across BCs. Using the kinetic  
450 weights, we automatically classified each BC-response as either  
451 unresponsive, On, Off, or On-Off, and computed the average chirp-  
452 response traces for the latter three categories per retinal region and  
453 condition ([Figure 5A,B](#)). In both the central and peripheral retina, blocking  
454 ACs reduced the number of Off- and unresponsive terminals and  
455 unmasked the presence of 'intrinsically On-Off' terminals. Following block  
456 of AC inputs, On-Off terminals were also observed in response to coloured  
457 stimuli, most notably to red- and UV ([Supplemental Figure S5A](#)), but they  
458 were never observed under control conditions.

459

460 Other effects of blocking inhibition were dependent on retinal region.  
461 Unmasking of On-Off responses, for example, was much more common in  
462 the peripheral compared to central retina. Moreover, on average,  
463 peripheral BCs of all polarities followed the frequency-accelerating part of  
464 the chirp for longer compared to central BCs, suggesting regional  
465 differences in the modulation of temporal processing. Overall, while  
466 blocking ACs mainly accentuated the pre-existing On-bias of the central  
467 retina, the same manipulation yielded a more complex re-distribution of  
468 response properties in the periphery.

469

470

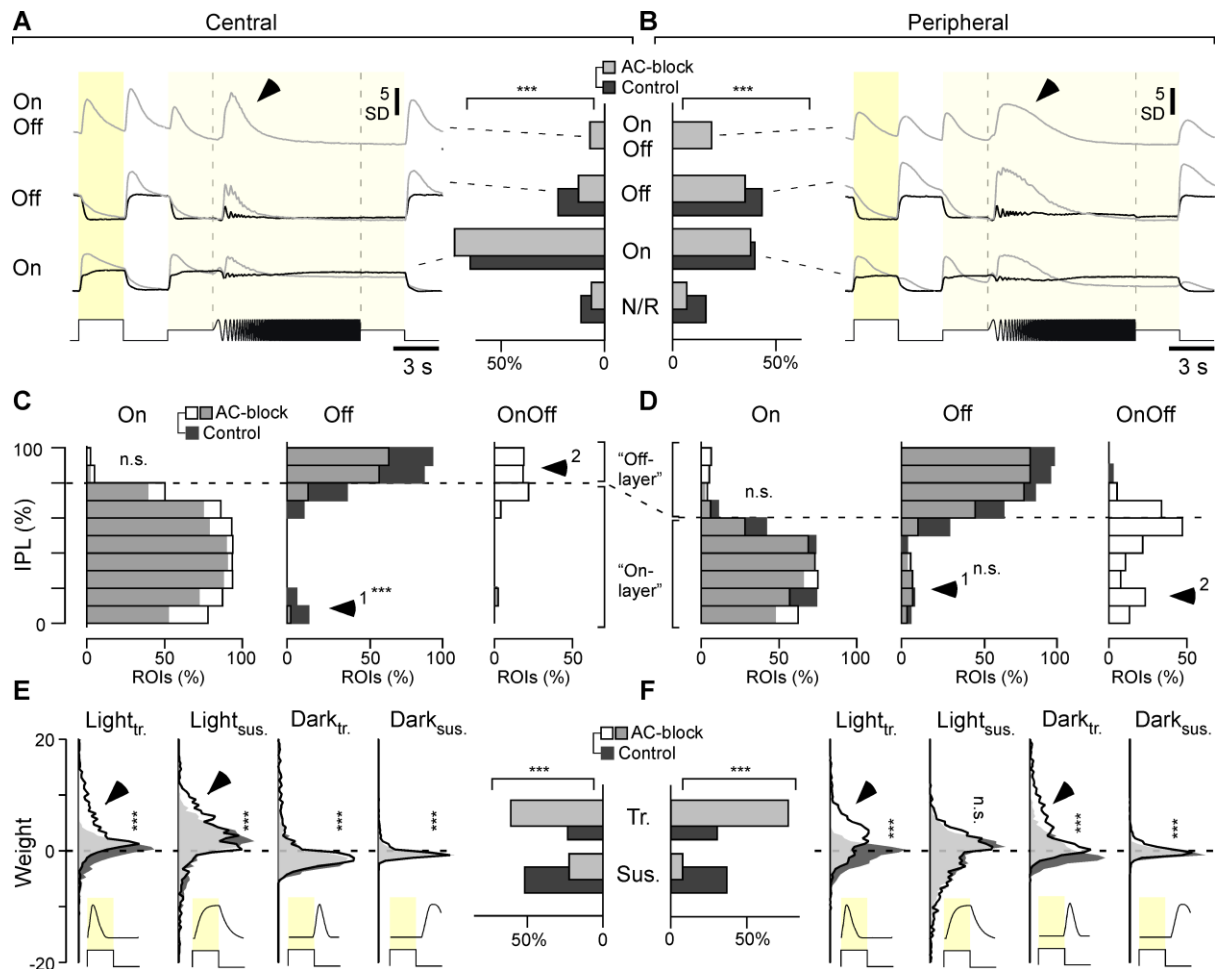

471  
472

**Figure 5 – ACs differentially modulate greyscale processing in BCs across the eye.** **A,B**, Bar plots: Distribution of BC-ROIs recorded in central (A) and peripheral retina (B) by response polarity (Non-responsive, On, Off, OnOff) before (control, dark grey) and after blocking inhibitory inputs (AC-block, light grey) as indicated (Chi-squared tests for the bar plots,  $p < 0.001$  for both datasets), and the corresponding mean response waveform to the white chirp stimulus (cf. Figure 4C) of all terminals in a given category. Arrowheads highlight distinct temporal dynamics during temporal-flicker across the regions. **C, D**, Distribution of On, Off and On-Off BC-terminals across the IPL as indicated with control data shown in dark grey and AC-block data superimposed semi-transparent in white, such that overlapping bars appear in light grey. Note that the On/Off boundary differs between the central (C) and peripheral retina (D, see also Refs<sup>18,19,33</sup>). Arrowheads highlight key differences between central and peripheral histogram-pairs. Two-sample Kolmogorov–Smirnov test, Central: On,  $p > 0.05$ ; Off,  $p < 0.01$ ; Peripheral: On,  $p > 0.05$ ; Off,  $p > 0.05$ . Due to the absence of datapoints in control conditions, no statistical tests were used to test changes for OnOff distributions. **E, F**, Distribution of kinetic component weights used to fit BCs' white step responses (cf. Supplemental Figure S1B, Methods) across the datasets and conditions as indicated (vertical histograms), and distribution into overall transient and sustained response-types (bar plots). Arrowheads highlight the major differences across control and AC-block condition in each case. Wilcoxon rank sum test for the distribution plots,  $p > 0.05$  for peripheral Light<sub>sus</sub> group,  $p < 0.001$  for all other groups; Chi-squared test for the bar plots,  $p < 0.001$  for both datasets.

492

493 To analyse how these changes in BC function were distributed across the  
494 IPL, we segregated terminals into ten strata and computed histograms  
495 summarising the relative depth-distributions of On-, Off-, and On-Off  
496 terminals in each region and condition (Figure 5C,D). Blocking inhibition  
497 from ACs had distinct effects in the central and peripheral retina. In the  
498 central retina, ectopic Off-responses in the On-layer were abolished

499 (Figure 5C, arrowhead) but these were not affected in the peripheral retina  
 500 (Figure 5D, arrowhead 1). In the central retina, blocking inhibition also  
 501 generated mixed On-Off responses in the Off-layer (Figure 5C, arrowhead  
 502 2), while in the peripheral retina On-Off response appeared throughout the  
 503 IPL (Figure 5D, arrowhead 2). These results demonstrate that ACs do not  
 504 simply regulate the gain and kinetics of the output from BCs, but also the  
 505 polarity. In the absence of inhibition, 19.3% of BC terminals in the  
 506 peripheral retina signal both On and Off transitions and these were  
 507 predominantly in the On-layer. This previously unrecognized function of  
 508 ACs - regulating the polarity of synaptic activity in BCs - was less  
 509 prominent in the central retina, where it was only evident in 7.6% of  
 510 terminals, and these were predominantly in the Off-layer.

511  
 512 Regional differences in the way that ACs interact with BCs were also  
 513 evident in the temporal domain (Figure 5E,F). Responses tended to  
 514 become more transient after blocking inhibition but this effect was much  
 515 stronger in the periphery, where it involved an accentuation of both Light-  
 516 and Dark-transient response components (Figure 5F, arrowheads). In  
 517 contrast, kinetic changes in the central retina were more moderate and  
 518 restricted to Light-transient and Light-sustained components (Figure 5E,  
 519 arrowheads).

520  
 521 These results demonstrate that ACs interact with BCs in a highly regional  
 522 manner. In the central retina, ACs regulate the gain and speed of  
 523 responses, suggesting that here, ACs primarily serve as a gain-control  
 524 system<sup>46</sup>. But in the peripheral retina, ACs also regulate the segregation of  
 525 On and Off signals in the On-layer. Below we ask how these functional  
 526 reorganizations of the inner retina impact spectral processing.

527

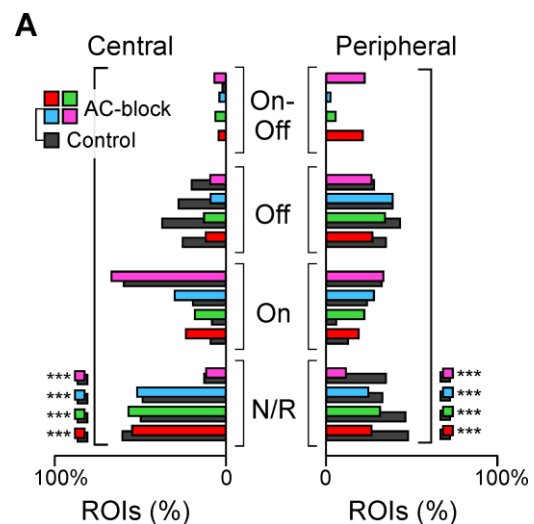

528  
 529  
 530 **Supplemental Figure S5 – related to Figure 5. A.** As bar plot in Figure 5A,B, but here shown  
 531 separately for the four colour steps (cf. Figure 4D) instead of the single white step. Chi-squared tests  
 532 were used to test for within-colour changes in the distribution of terminals by polarity,  $p < 0.001$  for all  
 533 four colours.  
 534



535  
536  
537  
538  
539  
540  
541  
542  
543  
544  
545  
546  
547  
548  
549  
550  
551  
552

### Changes in colour processing caused by blocking inhibition

To distinguish changes in wavelength from changes in intensity, circuits for colour vision contrast signals of different photoreceptor systems<sup>5,30</sup>. The resultant colour opponent neurons can be considered the fundamental ‘currency’ of colour vision. In zebrafish, BCs represent three types of spectral opponency (Figure 6A): Long- (“red-green”), mid- (“orange-blue”) and short- (“yellow-UV”), with spectral zero crossings at ~523, ~483 and ~450 nm, respectively<sup>18,19</sup>. Of these, long- (“red:green”) and mid-wavelength opponency (“orange:blue”) is already encoded at the level of green- and blue-cones, respectively<sup>7</sup>, implying that ACs are not necessary to establish these channels in BCs. In contrast, short-wavelength opponency (“UV:yellow”) is only weakly represented in UV-cones<sup>7</sup>, but dominant amongst BCs<sup>18</sup>. The expectation, therefore, is that short-wavelength opponency requires the activity of ACs. This expectation was confirmed in the case of BCs in the central retina but not the periphery.

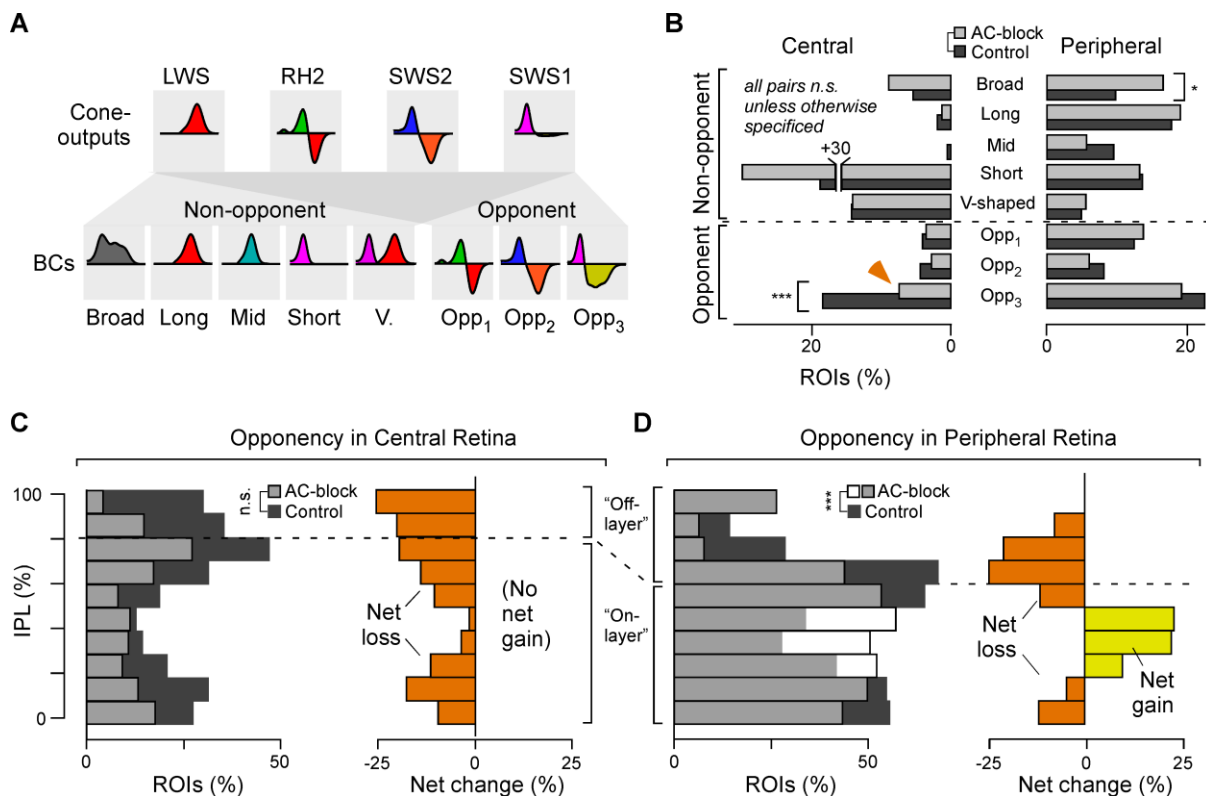

553  
554  
555  
556  
557  
558  
559  
560  
561  
562  
563  
564  
565

**Figure 6 – ACs differentially modulate colour processing in BCs across the eye.** **A**, Illustration of how cone input could build the different spectral response types in BCs. Insets indicate approximate spectral tuning functions (amplitude  $y$  versus wavelength  $x$ ). The upper row shows the four cones<sup>7</sup>, bottom rows shows BCs<sup>18,19</sup>, divided into five non-opponent and three opponent categories. **B**, Percentages of ROIs per spectral category (cf. A) based on BC kernels (cf. Figure 4E) for central (left) and peripheral datasets (right). Note that the distribution across spectral categories differs strongly by retinal region, but within a region most spectral categories are approximately stable between control (dark grey) and AC-block conditions (light grey). The main exception to this observation is indicated by the arrow. Wilcoxon rank sum tests, central:  $p > 0.05$  for the first 7 groups,  $p < 0.001$  for “Opp<sub>3</sub>” group; peripheral:  $p = 0.015$  for “Broad” group,  $p > 0.05$  for all others. **C**, **D**, Left: IPL distributions (C, central retina; D peripheral retina) of all ROIs classed as colour opponent during control condition

566 (dark grey) and following AC-block (white, such that their overlay is light grey). Right: Difference  
567 between control and AC-block in each case, with net loss of opponency shown in orange, and net  
568 gain in yellow. The full datasets leading to the summaries in B-D are shown in [Supplemental Data S6](#).  
569 Two-sample Kolmogorov–Smirnov test for changes in IPL distributions of opponent terminals, central:  
570  $p > 0.05$ ; peripheral:  $p < 0.001$ .

571

572 Opponency in BCs' was assessed from spectral kernels computed from  
573 colour-noise responses, as used for classifying ACs ([Figure 3A-D](#)).  
574 However, because BCs<sup>18,19</sup> are more spectrally diverse than ACs ([Figures](#)  
575 [1-3](#)), we classified each into one of eight (rather than four) groups: five  
576 non-opponent groups (broad, long-biased, mid-biased, short-biased, V-  
577 shaped) and three opponent groups (long-opponent: Opp<sub>1</sub>, mid-opponent:  
578 Opp<sub>2</sub>, short-opponent: Opp<sub>3</sub>, [Figure 6A,B](#) – for full classification see  
579 [Supplemental Figure S6](#)). This group allocation confirmed previous  
580 results<sup>18,19</sup> that under control conditions, the distribution of spectral  
581 response-types strongly differed across the two regions: While in the  
582 central retina, spectral groups that required a strong UV-input accounted  
583 for the vast majority of responses, the diversity of spectral response types  
584 was much more evenly distributed in the peripheral retina, including greater  
585 numbers of colour-opponent neurons (peripheral: 43.3%; central: 27.9%).  
586 Strikingly, in both retinal regions, these spectral distributions remained  
587 largely unchanged following AC-block: No major spectral response group  
588 disappeared altogether ([Figure 6B](#), and [Supplemental Figure S6](#)), and the  
589 abundance of many spectral groups was unchanged. For example, the  
590 numbers of V-shaped non-opponent responses appeared entirely  
591 unaffected in both retinal regions, while most colour-opponent groups  
592 exhibited only marginal changes.

593

594 The only significant effect of blocking inhibition on colour opponency that  
595 we could detect was a loss of short-opponent responses in the central  
596 retina in favour of a corresponding gain in short-biased non-opponent  
597 responses ([Figure 6B](#), arrow). This change was not observed in the  
598 peripheral retina, where all three opponent groups persisted throughout the  
599 pharmacological manipulation.

600

601 Having established that the short-opponent interactions between ACs' and  
602 BCs were specific for eye-region, we looked more closely at inhibitory  
603 circuits at different locations in the IPL. For simplicity, the distribution of  
604 colour opponency was assessed by summing the three colour-opponent  
605 groups into a single distribution per experimental condition ([Figure 6C,D](#),  
606 individual distributions shown in [Supplemental Figure S6B,D](#)). The colour-  
607 opponent responses appearing after block of inhibition were both short-  
608 and long-wavelength opponent ([Supplemental Figure S6D](#), arrowheads).

609

610 This finer analysis revealed that, despite the *overall* numerical conservation  
611 of all three opponencies in the peripheral retina following block of inhibition  
612 ([Figure 6B](#)), this was made up of a loss of opponency in the Off layer and a  
613 gain in the On layer ([Figure 6D](#)).

614

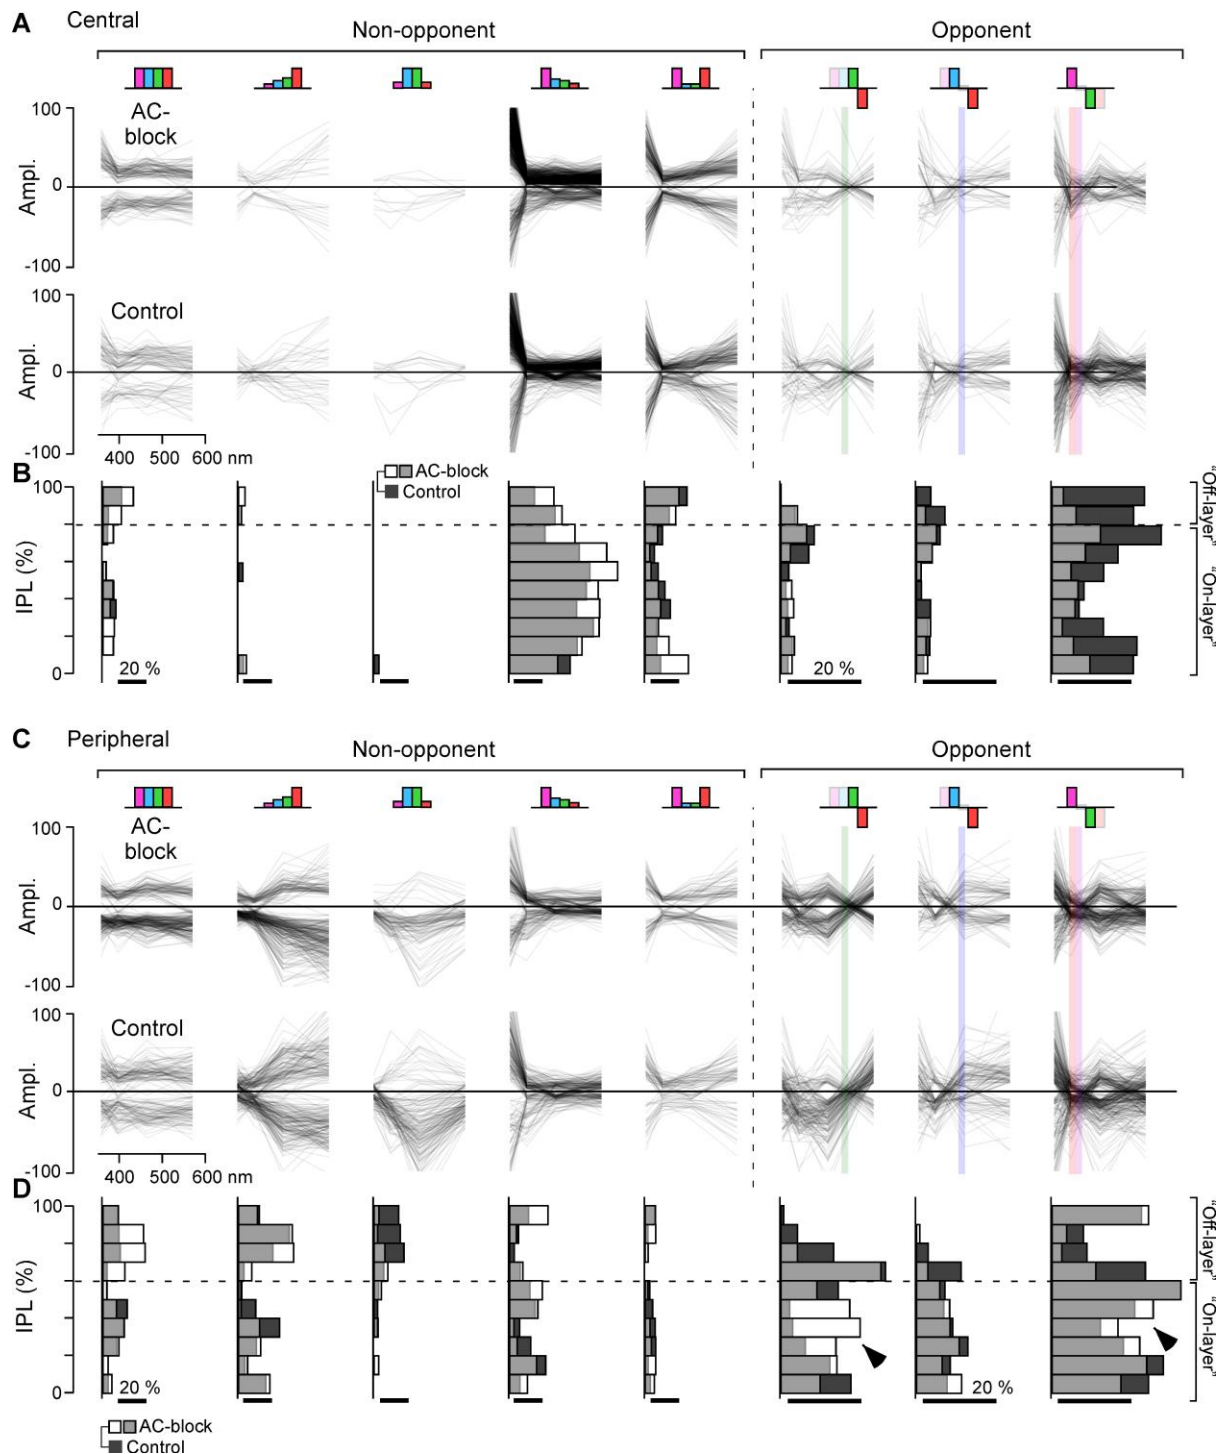

615

616

617 **Supplemental Figure S6 – related to Figure 6. A**, All central BCs' spectral tuning functions (based

618 on the kernels, cf. Figure 4E) under control (bottom) and AC-block condition (top) sorted into nine

619 categories as indicated (Methods, cf. Figure 6A,B, plotted in same order). Individual BCs are plotted

620 as semi-transparent grey such that darker shades overall indicate larger numbers of BCs. The

621 coloured vertical bars in the three opponent groups (right) indicate their corresponding spectral zero

622 crossings (based on Refs<sup>7,18</sup> – cf. Supplemental Figure S3B,C). **B**, As Figure 6C,D, data from (A)

623 summarised by IPL position. **C,D**, as (A,B), respectively, but for Peripheral retina. Arrowheads

624 indicate IPL regions where the representation of spectral opponency systematically increases

625 following AC-block. Two sample Kolmogorov–Smirnov tests, Central,  $p > 0.05$ ; Peripheral,  $p < 0.001$ .

626

627

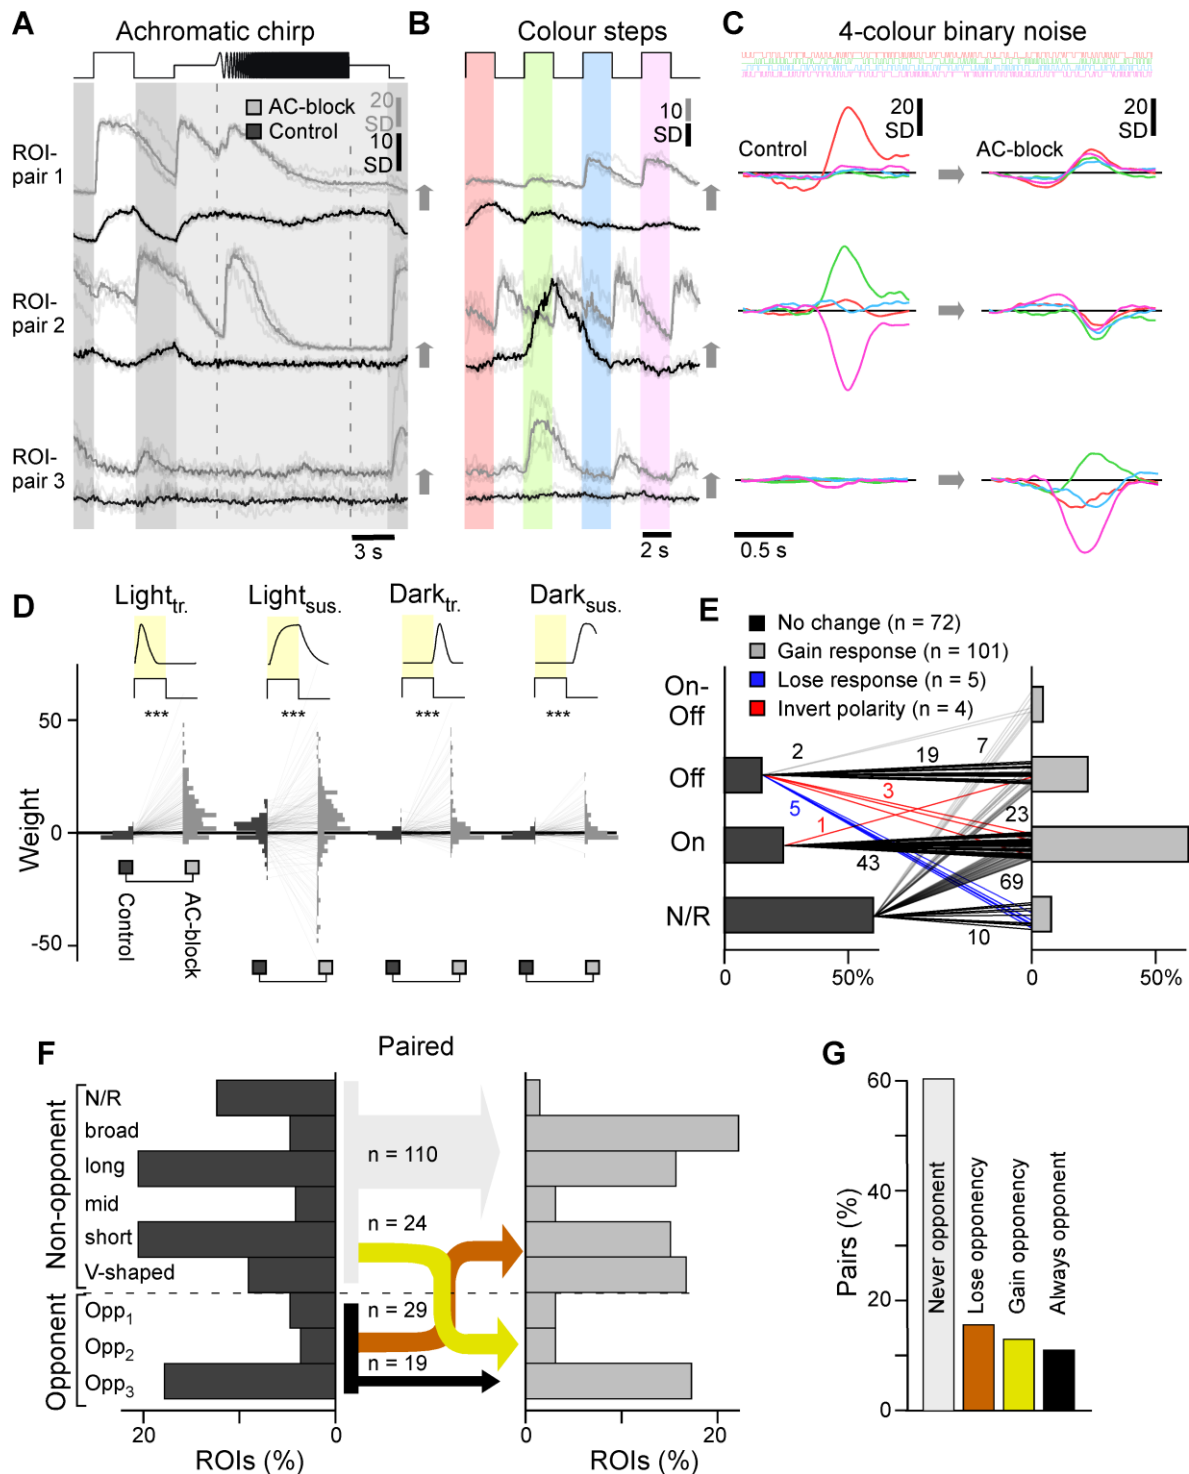

628

629

630 **Figure 7– Paired recordings.** A–C, Example ROI-pairs as indicated in *Supplemental Figure S7A–D*

631 illustrating frequently observed effects of AC-block on single terminals when probed with the same set

632 of stimuli used to classify all ACs (*Figure 1*) and BCs (*Figure 4*). Chirp and colour-step traces (E,F)

633 are vertically offset between the two conditions for clarity. D, As *Figure 5G,H*, but here for paired data

634 (n = 182), pairwise weight distributions for the four kinetic components in control (left) and AC-block

635 condition (right), as indicated. E, Paired BCs automatically sorted by polarity in control (left) and AC-

636 block conditions (right). Lines represent the pairs, with numbers of BCs indicated. Chi-squared test, p

637 < 0.001. F, As *Figure 6B*, allocation of BCs into spectral groups, here shown for paired dataset which

638 allowed connecting spectral groups in control condition (left) and following AC-block (right). For

639 simplicity, connections are collapsed into those where there is no change in colour opponency (grey,

640 black), where colour opponency is lost upon AC-block (orange), and where opponency is gained

641 (yellow), with numbers of BC pairs corresponding to each connection indicated. Note that non-  
642 responsive terminals are added as one extra non-opponent category, which resulted from the  
643 generally lower signal-to-noise ratio in SyGCaMP3.5 recordings, compared to previously used  
644 SyjGCaMP8m. **G**, Summary of changes to colour opponency as shown in (F).

645

646

### **ACs both create and mask colour opponency in individual BCs**

647

648

649

650

651

652

653

654

655

656

657

658

659

660

661

662

663

664

665

To investigate the how blocking inhibition caused a redistribution of colour-opponency in BCs we tracked the *same* terminals across recordings. This approach was not possible when expression of SyGCaMP was driven in all BCs because the high density of terminals in the IPL made it difficult to reliably identify the same terminal before and after the pharmacological manipulation. We therefore performed a new set of experiments using a different transgenic line where BCs expressed SyGCaMP3.5 sparsely (Supplemental Figure S7A). This strategy allowed us to record from 20-30 individual terminals at a time, out of which 40-60% could be reliably matched across control conditions and after blocking inhibition (Supplemental Figure S7A-D). We sampled 182 terminals from 14 fish covering the entire depth of the IPL. Because labelling was sparse, we combined all paired data into a single eye-wide dataset. We also recorded an equivalent but independent sham control dataset (n = 6 scans, n = 144 paired terminals), where we replaced the drug cocktail used to block inhibition with an equivalent volume of non-pharmacologically active vehicle. Sham injections had no significant effect on the functions we analysed (Supplemental Figure S7 Extended, Methods).

666

667

668

669

670

671

672

673

674

675

676

677

678

679

680

681

682

683

684

685

686

687

688

689

As expected, blocking inhibition generally disinhibited BCs, resulting in less selective, more transient, and larger amplitude responses (Figure 7A-E). As in our population dataset, changes in spectral processing were diverse. In ROI-pair 1, responses to colour steps (Figure 7B) were red-biased during control conditions but responded to all four wavelengths after blocking inhibition, and this spectral broadening was also observed at the level of the kernels (Figure 7C). It appears that in this case ACs were masking an intrinsic short-wavelength response to set-up a long-wavelength biased BC. However, the effects on ROI-pairs 2 and 3 were functionally opposite: ROI-pair 2 exhibited a green-UV colour-opponent response during control conditions, which was abolished following AC-block, while vice versa ROI-pair 3 exhibited weak non-opponent response during control conditions but green-UV opponency upon AC-block. Accordingly, in ROI-pair 2, ACs were responsible for setting up BC-opponency, while in ROI-pair 3 ACs masked an intrinsic form of BC-opponency.

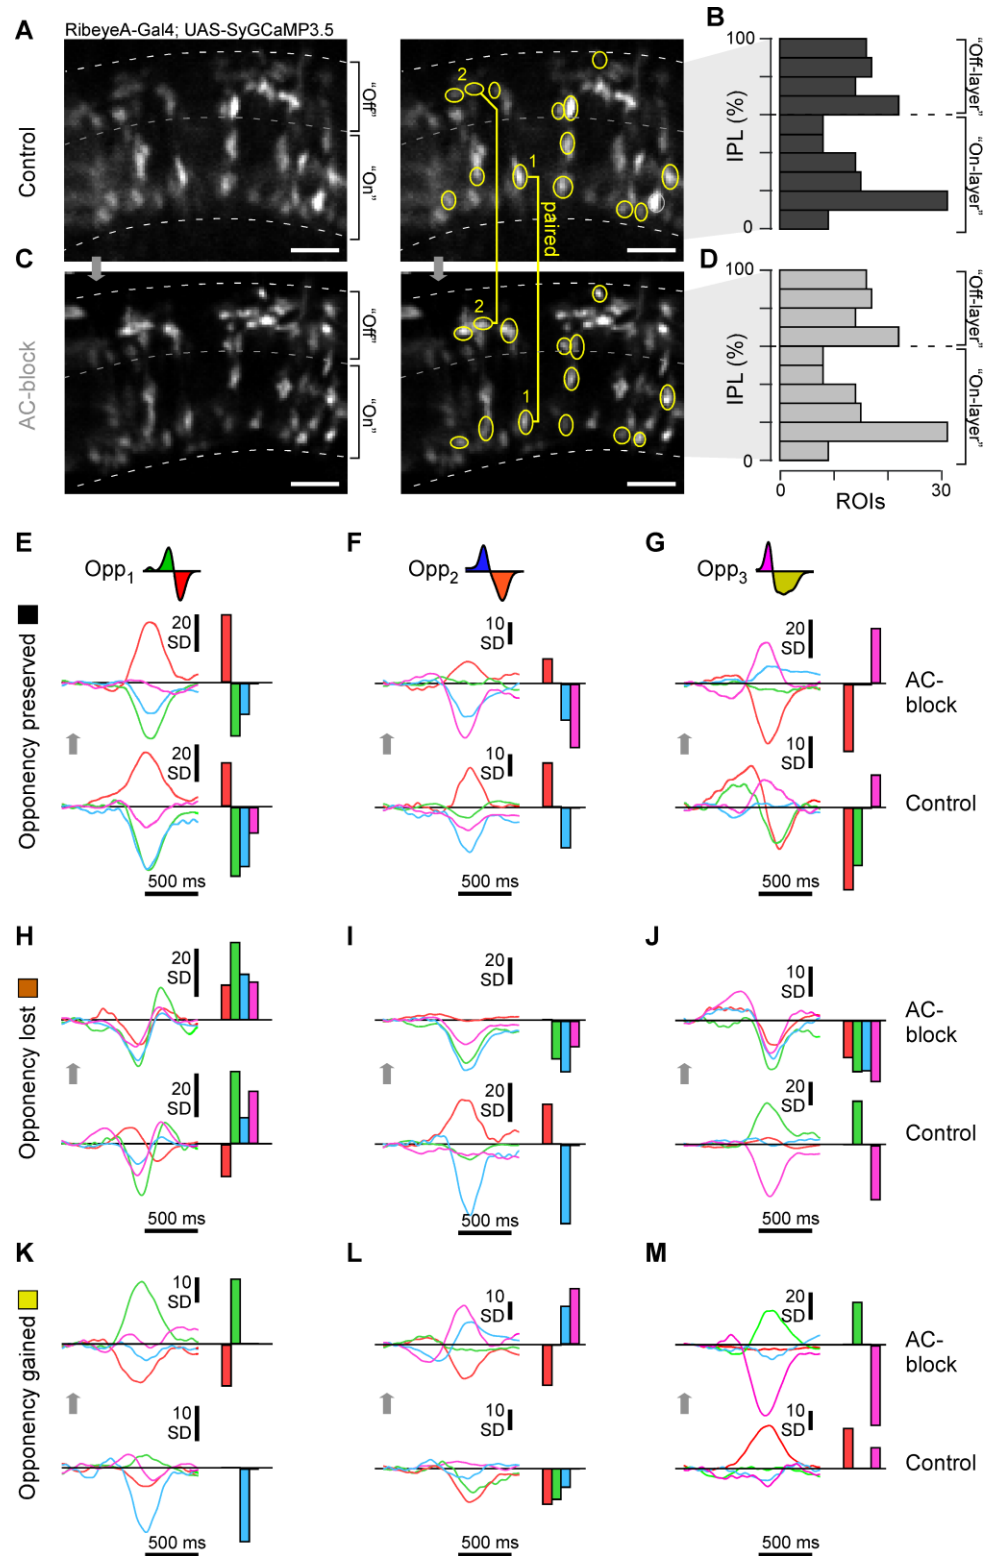

690

691

692 **Supplemental Figure S7 – related for Figure 7. A-D**, Example scan field with BCs sparsely

693 expressing SyGCaMP3.5 under control conditions (A) and the same field of view following AC-block

694 (B). Approximately half of visible BC terminals could be reliably matched across the two conditions

695 (yellow) and were counted as paired data. Paired terminals spanned the entire depth of the IPL (B,D).

696 **E-M**, Selected example BCs (paired data) that either preserved (E-G), lost (H-J) or gained (K-M)

697 spectral opponency following pharmacological removal of inner retinal inhibition. Examples from all

698 three types of opponencies are presented: red:green (Opp<sub>1</sub>, E,H,K), red/(green):blue (Opp<sub>2</sub>, F,I,L),

699 (red)/green:UV (Opp<sub>3</sub>, G,J,M). Shown in each case are the four spectral kernels (left) and their

700 automatically extracted response amplitudes (right, Methods).

701 To systematically assess how BC colour opponency is generated and/or  
702 destroyed by AC-circuits, we again allocated BC terminals into spectral  
703 groups (Figure 7F,G, cf. Figure 6B). Again, there was very little overall  
704 change among colour-opponent groups, yet more than half of individual  
705 terminals that exhibited colour opponency under control conditions lost  
706 their opponency following AC-block ( $n = 29$  of  $49$ , 59.2%). At the same  
707 time, an almost equal number of previously non-opponent BCs replenished  
708 the population of colour opponent BCs ( $n = 24$ ). This switching of opponent  
709 BCs between conditions affected all three opponent groups: Only 2/8  
710 (25%), 2/7 (29%) and 15/33 (45%) long-, mid- and short-wavelength  
711 opponent terminals, respectively, maintained their opponency throughout  
712 the pharmacological manipulation. Except for a single BC that switched  
713 from long- to short-wavelength opponency, all remaining opponent BCs  
714 lost their opponency altogether following AC-block. In fact, for all three  
715 colour opponent groups, individual examples could be identified where  
716 colour opponency was either preserved (Supplemental Figure S7E-G), lost  
717 (Supplemental Figure S7H-J) or gained (Supplemental Figure S7K-L)  
718 following AC-block. The overall picture, therefore, is that ACs exert  
719 different actions on colour-opponency in different BC terminals: in some  
720 terminals, ACs contribute to the generation of colour-opponency but in  
721 others they masked pre-existing opponency. These opposing effects of  
722 ACs were exerted on all three colour-opponent channels in approximately  
723 equal measure.

724

#### 725 ***ACs modulate BC-spectral processing via the On-channel***

726 The dominance of colour-opponent AC-circuits in the On-layer (Figure 3H)  
727 suggests that these ACs have a role in determining how the output from  
728 BCs is spectrally tuned. To test this idea, we analysed the colour-step  
729 responses of the paired dataset, which included many examples of  
730 spectrally selective modulation of On-signals, but spectrally non-selective  
731 modulation of Off-signals (Figure 8A-D). For example, under both control  
732 conditions and following block of inhibition, the Off-terminal shown in  
733 Figure 8A exhibited spectrally broad Off-responses, and ACs acted as  
734 achromatic controllers of gain and kinetics. In contrast, the On-terminals  
735 shown in Figures 8B-D all exhibited notable spectral changes after block of  
736 inhibition. This apparent On-dominance in AC-dependent spectral re-tuning  
737 was particularly striking in the example shown in Figure 8D: this BC-  
738 terminal exhibited spectrally non-selective Off-responses under control  
739 conditions, but block of inhibition unmasked spectrally selective short-  
740 wavelength On-responses (arrowheads), making this terminal colour-  
741 opponent overall.

742

743 To systematically assess the role of On- and Off circuits for shaping  
744 chromatic and achromatic circuit functions, responses to each colour-step  
745 were again fitted with a weighted sum of four kinetic building-blocks. We  
746 reasoned that any achromatic effects of ACs on BCs should lead to a high  
747 degree of covariation across wavelengths, while any spectral 'retuning' of  
748 BCs should manifest in some wavelength-responses being affected more

749 than others. To test this, the degree of response covariation across  
 750 wavelengths was assessed for each terminal. The plot in **Figure 8E** shows  
 751 how blocking inhibition from ACs changed responses in On- and Off-  
 752 terminals during red stimulation (dRed) plotted against the corresponding  
 753 amplitude changes in response to UV stimulation (dUV). The equivalence  
 754 line at 45° is the case where responses to red- and UV covary perfectly.  
 755 Most Off-responses (black dots) fell near the equivalence line but On-  
 756 responses showed a mixture of behaviours with a second population falling  
 757 on or near the 0° line (arrowhead) representing response amplitudes  
 758 changing to UV steps but not red. Only few points fell on the 90° line,  
 759 indicating a notable absence of On-responses that were modulated in red  
 760 without also being modulated in UV.  
 761

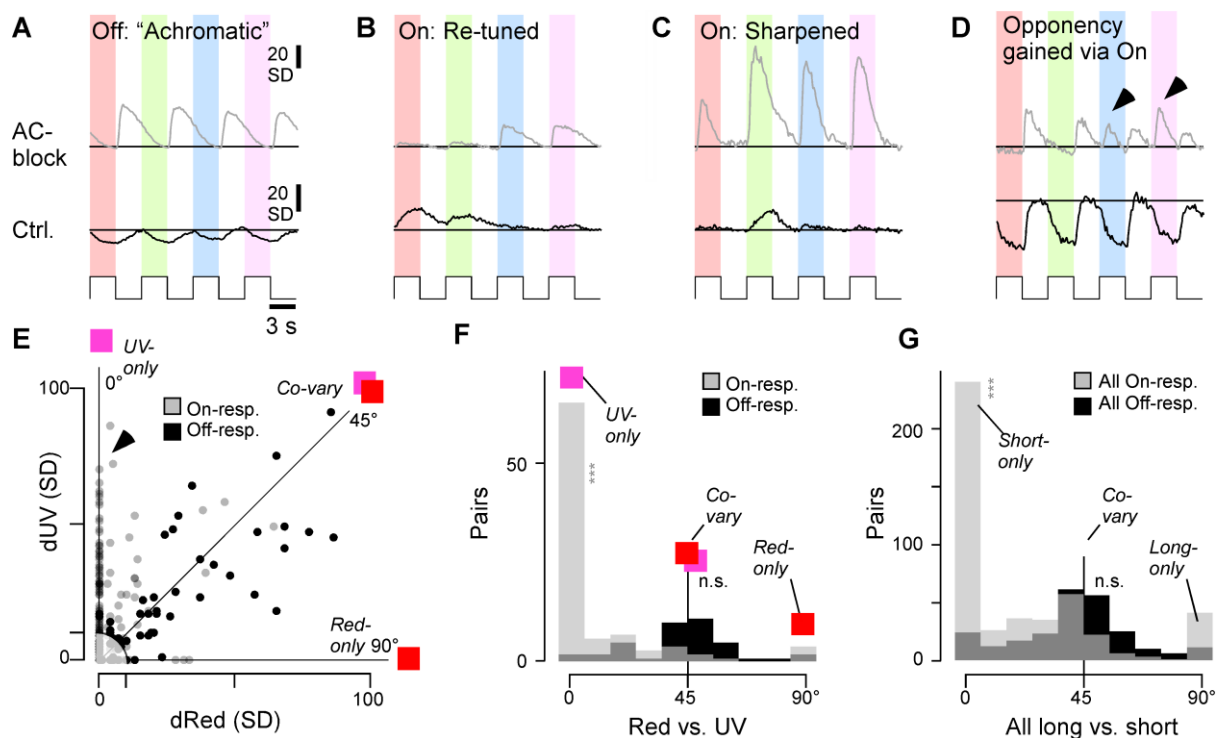

762  
 763  
 764 **Figure 8 – Selective spectral modulation of the On-pathway.** **A-D**, Selected example BC colour  
 765 step responses (trial averages) during control condition (bottom) and following AC-block (top, paired  
 766 data), illustrating a range of 'typical' results. Generally, changes in Off-responses tended to be similar  
 767 across all tested wavelengths (e.g.: **A**). In contrast, changes in On-responses tended to be more  
 768 spectrally diverse, and often effected a change in overall spectral tuning (e.g. panels **B,C**) including in  
 769 spectral opponency (e.g. panel **D**). Arrowheads in (**D**) highlight wavelength-specific switches in the  
 770 On-channel that led to a change in colour-opponency. **E-G**, co-variation of absolute response  
 771 amplitudes changes (in SD) after AC-blockage, compared across different pairs of wavelengths  
 772 (paired data). (**E**) shows individual scatterplot for red versus UV. On- and Off-responses plotted  
 773 separately, as indicated. Correspondingly, an angular histogram (**F**) was computed from this  
 774 scatterplot, where 45° indicates co-variation, while peaks around 0° and 90° indicate that one of the  
 775 two compared wavelength responses changes independently of the other. Datapoints with an  
 776 Euclidean distance <10 from the origin were excluded from further analysis (shaded area in **E**). (**F**)  
 777 shows the individual red-UV comparison, while (**G**) shows the sum of all six possible colour  
 778 combinations (cf. **Supplemental Figure S8**). Note Off-responses tended to co-vary (peak at 45°), while  
 779 On-responses exhibited a more diverse distribution, which included peaks are 0°, 45° and 90°. Wilcoxon Signed-Rank test for a given colour combination, tests were performed between On- or Off-  
 780 angular distributions and 45°: All On (**G**):  $p < 0.001$ , All Off (**G**):  $p > 0.05$ ; Red On (**F**):  $p < 0.001$  (red  
 781 vs. UV), Off:  $p = 0.24$  (red vs. UV).  
 782



783  
784  
785  
786  
787  
788  
789  
790  
791

To summarise this behaviour, we computed the corresponding angular histogram (Figure 8F), which showed a single peak around 45° for Off-responses indicating mostly co-variation, but two main peaks for On-responses: one at 45°, and another at 0°. This general pattern was stable for all possible colour combinations (Figure 8G, individual colour pairs shown in Supplemental Figure S8A-F). In the On-channel, but not in the Off, shorter wavelength responses were modulated more strongly than long wavelength responses.

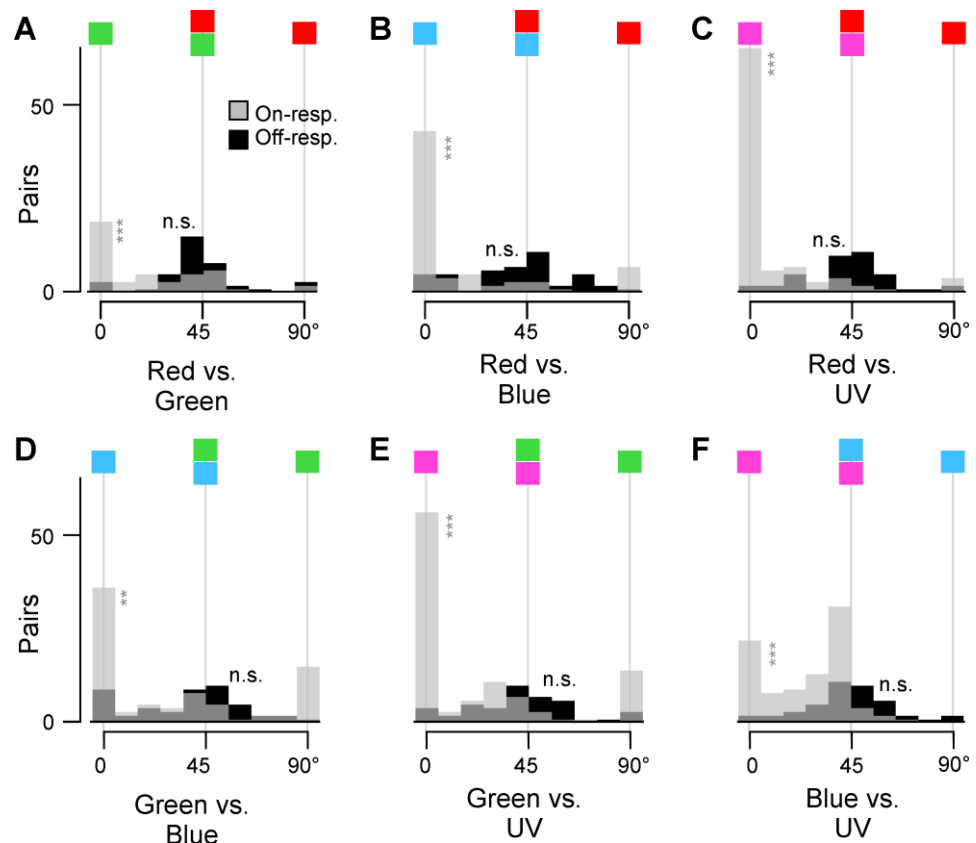

792  
793  
794  
795  
796  
797

**Supplemental Figure S8 – related to Figure 9. A-F, as Figure 9F, but for all six possible colour combinations. Wilcoxon Signed-Rank tests On:  $p < 0.001$  for all the combinations; Off:  $p > 0.05$  for all the combinations.**

798  
799  
800  
801  
802  
803  
804  
805  
806  
807  
808  
809  
810

This analysis provides further evidence that most spectral modulation of BCs by ACs occurs via the On-channel, with short-wavelength circuits being key targets of this modulation.

## DISCUSSION

Investigations of visual processing have usually dealt with stimulus dimensions of space and time, grey-scale processing, separately to colour. Here we have shown that grey-scale and colour processing interact through inhibitory circuits in the inner retina that vary between different zones (Figures 1-3). Blocking inhibition from ACs increased gain in BCs and made responses more transient, as well as unmasking mixed On-Off that were much more common in the peripheral retina compared to the center (Figures 4,5). Simultaneously, ACs contributed to the generation of

811 colour-opponency in the central retina but in the periphery, there was a  
812 mixture of effects, enhancing colour-opponency in some BCs while  
813 suppressing pre-existing opponency in others (Figures 3,6,7). ACs  
814 counteracting intrinsic colour-opponency of BCs acted with a high degree  
815 of specificity through just one of the two fundamental channels for grey-  
816 scale processing - the On-pathway (Figure 8). We conclude that the  
817 central and peripheral retina of larval zebrafish employ fundamentally  
818 distinct inhibitory circuits to control the interaction between greyscale- and  
819 colour-processing.

820

### 821 ***The role of ACs in colour vision***

822 In larval zebrafish, two forms of colour-opponency are established at the  
823 level of cone outputs<sup>7</sup>, but three are observed at the level of the  
824 downstream BCs<sup>18</sup>. Accordingly, the expectation is that the 'third' form of  
825 opponency ('UV:yellow') is set up by ACs. This was found to be the case in  
826 the central retina (Figure 6B,C) but in the periphery the population  
827 representation of colour-opponency was remarkably invariant to  
828 pharmacological removal of inner retinal inhibition (Figure 6B). At the level  
829 of *individual* BCs, however, ACs could either enhance or suppress colour  
830 opponency. These opposing effects were balanced across BCs by a  
831 combination of factors. First, a majority of ACs was essentially achromatic  
832 (Figure 3A-C), indicating that they do not alter spectral processing in a  
833 direct manner. Second, a minority of chromatic ACs appear to implement a  
834 switch, by which they mask pre-existing colour opponency in some BCs,  
835 while at the same time generating qualitatively equivalent information  
836 elsewhere (Figure 6D, 7F,G). This switch was implemented mostly by On-  
837 circuits (Figure 8), and correspondingly the dendrites of ACs that exhibit  
838 spectral opponency were located in the traditional On-layer (Figure 3H).

839

840 While it seems intuitive to suggest that colour opponent ACs underpin  
841 colour processing in BCs, it may also be that non-opponent ACs are  
842 involved in the same task. In principle, combining a spectrally broad AC  
843 with a spectrally narrow BC would lead to opponency, while combining an  
844 intrinsically opponent BC with a spectrally narrow or V-shaped AC might  
845 abolish the opponency. Indeed, blocking inhibition from ACs affected BCs'  
846 colour opponent signals across the entire IPL, including in the Off-layer  
847 where colour opponent ACs are absent.

848

849 In the future, the different anatomical distributions of colour coding BCs in  
850 the presence and absence of AC-inputs (Figure 6D) may provide an  
851 important handle for studying the diverse AC-BC circuits that contribute to  
852 this overall spectral balancing. Further, understanding if and how these  
853 correlative observations are causally linked will likely require the use of  
854 more specific transgenic lines that allow more selectively interfering with  
855 specific types of BCs and ACs. The same strategy should also help to  
856 decipher those BC circuits where ACs mask a pre-existing opponency.

857

### 858 ***A special role of On-circuits in zebrafish colour vision?***

859 Most AC-mediated spectral tuning in BCs – whether leading to changes in  
860 opponency or simply a rebalancing of non-opponent spectral tunings –  
861 were predominately implemented via the On- rather than the Off-channel  
862 (Figures 3H, 6D, 8). This observation adds to a growing body of evidence  
863 that zebrafish generally leverage On- rather than Off-circuits to compute  
864 diverse aspects of colour-information. For example, both at the level of the  
865 retinal output<sup>33</sup>, and within the brain<sup>32,47,48</sup>, most spectral diversity is  
866 represented in the On-channel. In contrast, the spectral tuning function of  
867 the brain's overall Off-response essentially resembles the spectral tuning  
868 function of red-cones in isolation, which also corresponds with the mean-  
869 spectrum of natural light in the zebrafish natural habitat<sup>7,32</sup>. From here, it is  
870 tempting to speculate that zebrafish generally use the Off-channel as an  
871 'achromatic reference', while On-circuits can, where required, provide  
872 spectrally biased points of comparison to serve spectral and colour vision.  
873 A predominant use of one rather than both polarities for encoding spectral  
874 information could also be advantageous in that it might permit largely  
875 unaltered travel of the red-cones' achromatic signal to the brain: by  
876 restricting the bulk of spectral computations to the On-strata of the IPL,  
877 circuits within the Off-strata can operate in an essentially achromatic  
878 manner. In agreement, the vast majority of ACs in the Off layer exhibited  
879 such achromatic tunings (Figure 3A,E). In the future it will be interesting to  
880 test if such an On-dominance amongst spectral computations is also a  
881 feature in other species.

882  
883 The possible link between polarity and distinct spectral functions also  
884 raises the question how On-Off responses are used for spectral coding.  
885 Among ACs, we observed a strong link between colour opponency and  
886 On-Off responses (Figure 2B, Supplemental Figure S2). Correspondingly,  
887 among BCs, intrinsic On-Off responses were routinely unmasked by  
888 blocking ACs, particularly in the central retina where they were present  
889 throughout the On-layer. (Figure 5A,B,E,F, Supplemental Figure S5A). In  
890 the future it will therefore be important to probe more directly to what extent  
891 On-Off processing in ACs and BCs can be causally linked to specific  
892 aspects of colour processing. Another unanswered question is the source  
893 of BCs' On-Off responses. Opponency in cones alone is unlikely to explain  
894 this observation. This is because cone-inversions from their intrinsic Off-  
895 response to an HC-mediated overall On-response occurs exclusively at  
896 long-wavelengths<sup>7</sup>; however, many unmasked On-Off BCs were short-  
897 wavelength biased (Supplemental Figure S5A). Instead, as for the  
898 observed intrinsic UV:yellow opponent BCs (see above), their existence  
899 points to the presence of yet unexplained mechanisms of signal transfer  
900 between cones and BCs in the zebrafish retina. One putative mechanism  
901 might involve On-acting excitatory amino acid transporters (EAATs)<sup>49,50</sup>.

### 902 ***Colour opponency in the absence of ACs***

904 The complex interplay of masked and generated BC opponencies in the  
905 absence of inner retinal inhibition confirms that BCs inherit diverse spectral  
906 opponencies from the outer retina<sup>5,7,18</sup>. However, the full picture is

907 decidedly more complex than anticipated from previous work. That long-  
908 and mid-wavelength opponencies can be preserved in BCs in the absence  
909 of ACs is perhaps expected, since these two axes are already fully  
910 represented by the two mid-wavelength cones<sup>7</sup>. However, it remains  
911 unclear how the third, short-wavelength opponent axis can persist. While,  
912 as with primates<sup>51</sup>, zebrafish UV-cones (SWS1) also exhibit weak but  
913 significant “UV:yellow” opponency<sup>7</sup>, it seems implausible that this can  
914 account for the observed effects. First, this pre-existing outer retinal  
915 opponency would need to be substantially boosted to match the much  
916 more pronounced opponency in BCs<sup>18</sup>. Second, in cones, this opponency  
917 was restricted to the central retina, and, therefore, it cannot account for the  
918 profusion of BCs’ UV:yellow opponencies observed in the periphery<sup>18</sup>.

919  
920 The continued presence of UV:yellow opponency in BCs following AC-  
921 block strongly points to the existence of a mechanism capable of  
922 selectively inverting cone signals within single BCs. Three potential and  
923 non-mutually exclusive mechanisms present themselves. First, a single BC  
924 might express both depolarising and hyperpolarising glutamate receptor  
925 systems at their dendritic tips that contact different cones (see also the  
926 above discussion on BCs’ On-Off signals). Second, BCs could receive  
927 direct inputs from HCs. For example, a putative BC driven by sign-inverted  
928 inputs from UV-cones (i.e. UV-On) could simultaneously receive sign-  
929 preserving inputs from H1 and/or H2 HCs, which themselves carry a sign-  
930 preserving long-wavelength biased signal<sup>7</sup>. In zebrafish, the presence of  
931 direct inputs from HCs to BCs has not been observed; however, the  
932 concept is tentatively supported by the anatomical presence HC-BC  
933 contacts in mice<sup>52</sup>. Third, zebrafish might have ACs that use fast  
934 neurotransmitters other than GABA and/or glycine, which presumably  
935 continue to function throughout our pharmacological interventions. For  
936 example, mice feature VGlut3 ACs, a population of part-glutamatergic ACs  
937 implicated in motion processing<sup>53-55</sup>. Similarly, another key neuron  
938 implicated in mammalian motion processing is the starburst amacrine cell  
939 (SAC) which co-releases acetylcholine alongside GABA<sup>56,57</sup>. However, the  
940 functional role of SACs outside mammals remains sparsely explored<sup>58</sup>.

941  
942 ***The role of green- and blue-cone circuits in supporting inner retinal***  
943 ***colour processing***

944 Unlike red- and UV-cones, zebrafish green- and blue-cones provide  
945 strongly colour opponent outputs due to feedforward signals from the  
946 HCs<sup>7</sup>. Accordingly, these cones might directly support colour opponency in  
947 BCs. In support of this hypothesis, the spectral zero-crossings marked by  
948 these two cones remain represented within BCs, both in the presence and  
949 in the absence of ACs. However, only a minority of green- and blue-cone-  
950 like BCs retained their specific opponency upon AC-block (Figure 7A). This  
951 suggests that while the signals from green- and blue- cones can be directly  
952 used to support colour opponency in BCs, this motif is by no means  
953 dominant when considering the complete circuit. Instead, most BC circuits  
954 that represent these two spectral opponencies required inputs from ACs. In

955 zebrafish, green- but not blue-cones provide cone-type-exclusive drive for  
956 at least two anatomically distinct types of BCs<sup>12</sup>, providing a possible  
957 neural substrate for the minority of green-cone-like BCs that were  
958 unaffected by AC-block. These might account for some of the unmasked  
959 green-cone-like BCs when ACs were blocked. Possible green-cone-  
960 exclusive BCs might also link with the observation that green-light  
961 stimulation could result in long-wavelength biased spectral effects on BCs  
962 (Supplemental Figure S9D,E), and that most opponent ACs seemed to be  
963 partially built from green-cone inputs (Supplemental Figure S3D,E).

964  
965 In contrast, the possible roles of blue-cones in zebrafish colour vision  
966 remain much more elusive. A blue-cone-exclusive BC is not known to  
967 exist<sup>12</sup>, which leaves the origin of any intrinsic blue-cone-like BC-tunings  
968 unclear. Further, we found no evidence of any major involvements of blue-  
969 cones in AC-processing (Supplemental Figure S3D,E). On the other hand,  
970 the four LEDs used in the present study were not optimally placed to  
971 disambiguate blue- from UV-cone contributions (Supplemental Figure  
972 S3B,C). Nevertheless, our findings add to a perhaps puzzling body of  
973 evidence that questions a key role of blue-cones in shaping larval zebrafish  
974 vision<sup>5</sup>.

975  
976 ***An evolutionary perspective.***

977 These results provide tentative insights into the evolution of computation in  
978 the brain: in vertebrates and diverse invertebrate eyes alike, the evolution  
979 of colour computations likely preceded the evolution of complex  
980 spatiotemporal vision. This is because (i) opsins including their immediate  
981 spectral diversification preceded the evolution of highly resolved spatial  
982 vision in any animal by some 250 million years<sup>59</sup>, (ii) all extant vertebrates,  
983 including lampreys, feature subsets of the same four ancestral opsins  
984 across their photoreceptors<sup>4,5</sup>, and (iii) particularly in shallow water where  
985 vision first evolved, spectral information provides a wealth of behaviourally  
986 critical cues that do not categorically need supplementing with spatial  
987 information (discussed e.g. in Refs<sup>5,59,60</sup>). From here, it seems plausible  
988 that the earliest forerunners of vertebrate eyes<sup>61</sup> gradually evolved the bulk  
989 of their inner retinal circuits on top of well-functioning outer retinal circuits  
990 that already provided useful spectral information. In such a scenario, inner  
991 retinal circuit evolution would have occurred under constant selection  
992 pressure to maintain coding efficiency for colour vision, thus perhaps  
993 explaining the arrangement that we see in zebrafish today. This  
994 interpretation would further imply that perhaps also in other layered  
995 networks of brains, the primary function of some microcircuits may not be  
996 to create new computations, but rather to make up for computations which  
997 would otherwise be lost.

998  
999

1000  
1001  
1002  
1003  
1004  
1005  
1006  
1007  
1008  
1009  
1010  
1011  
1012  
1013  
1014  
1015  
1016  
1017  
1018  
1019  
1020  
1021  
1022  
1023  
1024  
1025  
1026  
1027  
1028  
1029  
1030  
1031  
1032  
1033  
1034  
1035  
1036  
1037  
1038  
1039  
1040  
1041  
1042  
1043  
1044  
1045  
1046  
1047

## METHODS

### **Lead Contact**

Further information and requests for resources and reagents should be directed to and will be fulfilled by the Lead Contact, Tom Baden (t.baden@sussex.ac.uk).

**Data and Code Availability.** Pre-processed functional 2-photon imaging data and associated summary statistics will be made freely available on Data Dryad and via the relevant links on <http://www.badenlab.org/resources> and <http://www.retinal-functomics.net>.

**Materials Availability.** The transgenic lines Tg(ribeye: SyjGCamp8m), Tg(ribeye:Gal4; UAS:SyjGCamp3.5), Tg(ptf1a:Gal4;UAS:SyjGCamp3.5), Tg(opn1sw1:GFP:SyjCaMP6f), Tg(opn1sw2:SyjCaMP6f), Tg(LCRhsp70l:SyjCaMP6f), Tg(trb2:syjGCamp6f) used in this study have been previously published<sup>25</sup> and are also available upon request to the lead author.

## EXPERIMENTAL MODEL AND SUBJECT DETAILS

**Animals.** All procedures were performed in accordance with the UK Animals (Scientific Procedures) act 1986 and approved by the animal welfare committee of the University of Sussex. Animals were housed under a standard 14:10 day/night rhythm and fed three times a day. Animals were grown in 0.1 mM 1-phenyl-2-thiourea (Sigma, P7629) from 1 *dpf* to prevent melanogenesis. For all experiments, we used 6-8 days post fertilization (*dpf*) zebrafish (*Danio rerio*) larvae. For 2-photon *in-vivo* imaging, zebrafish larvae were immobilised in 3% low melting point agarose (Fisher Scientific, BP1360-100), placed on a glass coverslip and submerged in fish water. Eye movements were prevented by injection of  $\alpha$ -bungarotoxin (1 nL of 2 mg/ml; Tocris, Cat: 2133) into the ocular muscles behind the eye.

## METHOD DETAILS

**Light Stimulation.** With fish mounted on their side with one eye facing upwards towards the objective, light stimulation was delivered as full-field flashes of light. For this, we focused a custom-built stimulator through the objective, fitted with band-pass-filtered light-emitting diodes (LEDs) ('red' 588 nm, B5B-434-TY, 13.5 cd, 8°; 'green' 477 nm, RLS-5B475-S, 3-4cd, 15°, 20 mA; 'blue' 415 nm, VL415-5-15, 10-16 mW, 15°, 20 mA; 'ultraviolet' 365 nm, LED365-06Z, 5.5 mW, 4°, 20 mA; Roithner, Germany). LEDs were filtered and combined using FF01-370/36, T450/pxr, ET420/40 m, T400LP, ET480/40x, H560LPXR (AHF/Chroma). The final spectra approximated the peak spectral sensitivity of zebrafish R-, G-, B-, and UV-opsins (Supplemental Figure S3B-D), respectively, while avoiding the microscope's two detection bands for GFP and mCherry. To prevent interference of the stimulation light with the optical recording, LEDs were

1048 synchronized with the scan retrace at 1 kHz (1 ms line duration) using a  
1049 microcontroller and custom scripts. Further information on the stimulator,  
1050 including all files and detailed build instructions can be found in Ref<sup>43</sup>.  
1051 Stimulator intensity was calibrated to be spectrally flat at 30 mW per LED,  
1052 which corresponds to low-photopic conditions. Owing to 2-photon  
1053 excitation of photopigments, an additional constant background illumination  
1054 of  $\sim 10^4$  R\* was present throughout<sup>64,65</sup>. For all experiments, larvae were  
1055 kept at constant illumination for at least 5 seconds after the laser scanning  
1056 started before light stimuli were presented. Three types of full-field stimuli  
1057 were used: (i) a spectrally flat ‘white’ chirp stimulus<sup>66</sup> where all four LEDs  
1058 were driven together, (ii) flashes of light at each of the four wavelengths (2  
1059 s On, 2 s Off), and (iii) a binary dense and spectrally flat white noise, in  
1060 which the four LEDs were flickered independently in a known random  
1061 binary sequence at 6.4 Hz for 300 seconds.

1062  
1063 **2-photon calcium imaging.** All 2-photon (2P) imaging was performed on  
1064 custom-built 2P microscope equipped with a mode-locked Ti:Sapphire  
1065 laser (Chameleon 2, Coherent) tuned to 915 nm for SyGCaMP imaging.  
1066 Emitted photons were collected through the objective (Nikon, MRD77225,  
1067 25X) as well as through an oil condenser (NA 1.4, Olympus) below the  
1068 sample using GaAsP photodetectors (H10770PA-40, Hamamatsu). For  
1069 image acquisition, we used ScanImage software (r 3.8) running under  
1070 Matlab (R 2013b). All recordings were taken at 128 x 100 pixels (10 Hz  
1071 frame rate at 1 ms per scan line).

1072  
1073 **Pharmacological manipulation.** For pharmacological AC blockage, we  
1074 injected  $\sim 4$  nL of a solution containing antagonist to GABA<sub>A</sub>, GABA<sub>C</sub> and  
1075 glycine receptors into the anterior chamber of the retina. The estimated  
1076 final concentration in the extracellular space was 5  $\mu$ M gabazine (Sigma)  
1077 as antagonist of GABA<sub>A</sub> receptors; 5  $\mu$ M TPMPA (Sigma) as antagonist of  
1078 GABA<sub>C</sub> receptors; 5  $\mu$ M strychnine (Sigma) as antagonist of glycine  
1079 receptors<sup>26</sup>. The solution also contained 1 mM Alexa 594 for verifying the  
1080 quality of the injection.

1081  
1082 **Data analysis.** Data analysis was performed using IGOR Pro 6.3 and 8.2  
1083 (Wavemetrics), Fiji (NIH) and Matlab R2019b / R2020b (Mathworks).

1084  
1085 **ROI placement, IPL detection and functional data pre-processing.**  
1086 Where necessary, images were xy-registered using the registration  
1087 function provided in SARFIA<sup>67</sup> running under IGOR Pro 8.2. For AC data,  
1088 ROIs were defined automatically based on local image correlation over  
1089 time, as shown previously<sup>13</sup>. For densely labelled SyjGCaMP8m BC data,  
1090 regions of interests (ROIs) were placed automatically after local  
1091 thresholding of the recording stack’s standard deviation (typically  $>20$ )  
1092 projection using the tetrachromatic noise data, followed by filtering for size  
1093 and shape using custom-written scripts running under IGOR Pro 8.2  
1094 (WaveMetrics), as described previously<sup>34</sup>. For sparsely labelled  
1095 SyGCaMP3.5 BC data, ROIs were drawn by hand based on the standard

1096 deviation projection across the tetrachromatic noise data. The ROIs from  
1097 control condition and drug condition were drawn separately. Terminals  
1098 were paired across the two conditions using the experimenter's best  
1099 judgment, which we found to be more reliable than automated procedures.  
1100 The matching of terminals across conditions was greatly facilitated by the  
1101 sparse expression strategy, and throughout we tried to be as conservative  
1102 as possible to only match terminals when we were certain that they are the  
1103 same ones (i.e. minimising false positives, at the expense of false  
1104 negatives). For cone recordings, the ROIs were drawn manually from the  
1105 standard deviation projection across time.  
1106 In all scans within the IPL layer, IPL boundaries were drawn by hand using  
1107 the custom tracing tools provided in SARFIA<sup>67</sup>. The IPL positions were then  
1108 determined based on the relative distance of a ROIs' centre of mass  
1109 between the IPL boundaries and mapped to the range 0% to 100%.  
1110 Fluorescence traces for each ROI were z-normalised, using the time  
1111 interval 2-6 seconds at the beginning of recordings as baseline. A stimulus  
1112 time marker embedded in the recording data served to align the Ca<sup>2+</sup>  
1113 traces relative to the visual stimulus with a temporal precision of 1 ms.  
1114 Responses to the chirp and step stimuli were up sampled to 1 kHz and  
1115 averaged over 5 trials. For data from tetrachromatic noise stimulation we  
1116 mapped linear receptive fields of each ROI by computing the Ca<sup>2+</sup>  
1117 transient-triggered-average. To this end, we resampled the time-derivative  
1118 of each trace to match the stimulus-alignment rate of 500 Hz and used  
1119 thresholding above 0.7 standard deviations relative to the baseline noise to  
1120 the times  $t_i$  at which Calcium transients occurred. We then computed the  
1121 Ca<sup>2+</sup> transient-triggered average stimulus, weighting each sample by the  
1122 steepness of the transient:

$$F(l, \tau) = \frac{1}{M} \sum_{i=1}^M \dot{c}(t_i) S(o, t_i + \tau)$$

1123 Here,  $S(l, t)$  is the stimulus ("LED" and "time"),  $\tau$  is the time lag (ranging  
1124 from approx. -1,000 to 350 ms) and  $M$  is the number of Ca<sup>2+</sup> events. The  
1125 resulting kernels are shown in z-scores for each LED, normalised to the  
1126 first 50 ms of the time-lag. To select ROIs with a non-random temporal  
1127 kernel, we used all ROIs that exceeded a standard deviation of ten in at  
1128 least one of the four spectral kernels. The precise choice of this quality  
1129 criterion had no major effect on the results.  
1130

1131  
1132 **Kernel polarity.** The use of a fluorescence-response-triggered average  
1133 stimulus (here: 'kernel') as a shorthand for a neuron's stimulus-response  
1134 properties, while potentially powerful (e.g. Refs<sup>13,19,33</sup>), ought to be  
1135 considered with some caution. For example, determining a binary value for  
1136 a kernel's polarity (On or Off) can be conflicted with the fact that a neuron  
1137 might exhibit both On and Off response aspects. Moreover, different  
1138 possible measures of On or Off dominance in a kernel can generate  
1139 different classification biases. Here, following our previously established  
1140 approach<sup>19,33</sup> we defined On and Off based on a measure of a kernel's  
1141 dominant trajectory in time. Before the calculation, we first smoothed the



1142 kernels to eliminate the high-frequency noise. After that, we determined the  
1143 position in time of each kernel's maximum and minimum. If the maximum  
1144 preceded the minimum, the kernel was classified as Off, while vice versa if  
1145 the minimum preceded the maximum, the kernel was defined as On.

1146  
1147 **Reconstruction of step responses using kinetic components.** To  
1148 reconstruct each cell's mean response into constituent spectral and  
1149 temporal components we used four temporal components associated with  
1150 a given light response (i.e. 3 s light, 3 s dark for 'white' steps, and 2 s light  
1151 2 s dark for 'colour' steps), following a previously described approach<sup>18</sup>.  
1152 The temporal components used resembled light-transient, light-sustained,  
1153 dark-transient, and dark-sustained temporal profiles ([Supplemental Figure](#)  
1154 [S1B](#)). These components were fitted to the trial-averaged step responses  
1155 of individual ROIs in sequence, in each case minimising the mean squared  
1156 difference between a template's peak and the corresponding five time-  
1157 points in measured response, with previously fitted components  
1158 subtracted. The fit sequence was: Light-sustained, light-transient, dark-  
1159 sustained, dark-transient. This yielded four corresponding weights, scaled  
1160 in z-scores in accordance with the amplitudes of the trial averaged  
1161 response means.

1162 To assess reconstruction quality, reconstructed data was subtracted from  
1163 the original ROI-means to yield residuals. From here, we compared original  
1164 data, reconstructions, and residuals based on variance explained across  
1165 all ROIs (as in Ref<sup>18</sup>). To this end, we first computed the total variance  
1166 across all clusters for each time-point, computed the area under the curve  
1167 for each variance-trace, and normalised each to the result from the original  
1168 cluster means. By this metric, reconstructions captured 98%, 97%, 95%  
1169 and 96% of the total variance for the 'white-control', 'white-AC-block' and  
1170 'colour-control' and 'colour-AC-block' steps, respectively.

1171 Response polarity per ROI was then computed as follows. A ROI was  
1172 considered as displaying an On-response if the sum of the light-transient  
1173 and light-sustained weights exceeded 3 SD. A ROI was considered as  
1174 displaying an Off-response if either the sum of the light-transient and light-  
1175 sustained weights was more negative than -3 SD, or if the sum of the dark-  
1176 transient and dark-sustained components exceeded 3 SD. If by these  
1177 criteria a ROI display both On- and Off-responses, it was counted as On-  
1178 Off. ROIs failing to elicit either On- or Off-responses were counted as non-  
1179 responsive.

1180  
1181 **Clustering of ACs.** Clustering was performed on the dataset containing  
1182 the functional responses of ACs to chirps, colour steps and kernels derived  
1183 from the colour noise stimulus. All input traces were up sampled to 1 kHz  
1184 (cf. pre-processing) which yielded  $n = 25,000$  points (chirp), four times  $n =$   
1185  $4,000$  points (steps) and four times  $n = 1,299$  points (kernels). Responses  
1186 to all three stimuli were used for the clustering.

1187 Regions of interest (ROIs) with low-quality responses to all three stimuli  
1188 were identified and removed from the data set, ROIs with a high-quality  
1189 response to at least one stimulus being retained in all cases. The quality of

1190 response to the chirp and step stimuli was determined using the signal-to-  
1191 noise ratio quality index:  $QI = \text{Var}[\langle C \rangle_r]_t / \langle \text{Var}[C]_t \rangle_r$ , where  $C$  is the  $T$   
1192 by  $R$  response matrix (time samples by stimulus repetitions), and  $\langle \cdot \rangle_x$  and  
1193  $\text{Var}[\cdot]_x$  denote the mean and variance respectively across the indicated  
1194 dimension,  $x \in \{r, t\}$  (see Ref<sup>66</sup>). A quality threshold of 0.35 was chosen,  
1195 below which responses were judged to be of poor quality. We calculated  
1196 the standard deviation in the light intensity over time for each stimulus  
1197 colour in the kernel (R, G, B and UV). The kernel quality of each ROI was  
1198 defined as the maximum standard deviation across the four colours. A  
1199 kernel quality threshold of 5 was chosen, below which kernels were judged  
1200 to be of poor quality. The raw data set was of size  $n = 1,776$ . Following  
1201 quality control, the data set was of size:  $n = 1,743$  (98.1% of the original).  
1202 We scaled the data corresponding to each chirp, step colour and kernel  
1203 colour by dividing each one by the standard deviation through time and  
1204 across ROIs. In this way we ensured an even weighting between stimuli.  
1205 We used principal component analysis (PCA) to reduce the dimensions of  
1206 the problem prior to clustering. PCA was performed using the Matlab  
1207 routine **pca** (default settings). We applied PCA separately to the chirps and  
1208 to the portions of a data set corresponding to each of the step and kernel  
1209 colours, retaining the minimum number of principal components necessary  
1210 to explain  $\geq 99\%$  of the variance. The resulting nine ‘scores’ matrices were  
1211 then concatenated into a single matrix ready for clustering. The following  
1212 numbers of principal components were used – chirp: 41; step: 8 R  
1213 components, 9 G components, 13 B components and 13 UV components;  
1214 kernels: 7 R components, 16 G components, 31 B components and 21 UV  
1215 components, giving 159 PCA components in total.  
1216 We clustered the combined ‘scores’ matrix using Gaussian Mixture Model  
1217 (GMM) clustering, performed using the Matlab routine **fitgmdist**. We  
1218 clustered the data into clusters of sizes 1,2,...,50, using i) shared-diagonal,  
1219 ii) unshared-diagonal, iii) shared-full and iv) unshared-full covariance  
1220 matrices, such that ( $50 \times 4 =$ ) 200 different clustering options were explored  
1221 in total. For each clustering option 20 replicates were calculated (each with  
1222 a different set of initial values) and the replicate with the largest  
1223 loglikelihood chosen. A regularisation value of  $10^{-5}$  was chosen to ensure  
1224 that the estimated covariance matrices were positive definite, while the  
1225 maximum number of iterations was set at  $10^4$ . All other **fitgmdist** settings  
1226 were set to their default values.  
1227 The optimum clustering was judged to be that which minimised the  
1228 Bayesian information criterion (BIC), which balances the explanatory power  
1229 of the model (loglikelihood) with model complexity (number of parameters).  
1230 Lastly, clusters with  $< 10$  members were removed.  
1231 Using the above procedure, we obtained 23 clusters (1 cluster with  $< 10$   
1232 members was removed), with unshared diagonal covariance matrices  
1233 providing the optimal solution. Finally, we split  $n = 4$  clusters with a notably  
1234 bimodal IPL distribution into their On- and Off-stratifying components (IPL-  
1235 cut at 60% depth), yielding a total of 27 response groups. To what extent  
1236 the 27 clusters correspond to AC-types remains unknown, and in view of

1237 >60 AC types in mice<sup>22</sup>, 27 putative types in zebrafish probably  
1238 underestimates their full diversity, which is likely part related to the  
1239 necessarily incomplete sampling of the full stimulus space and/or possible  
1240 incomplete labelling of the ptf1a driver.

1241  
1242 **Fitting of AC-cluster spectral tuning functions with cones.** Spectral  
1243 tuning functions of AC clusters means were matched to those of previously  
1244 recorded cones (cf. [Supplemental Figure 3B,C](#)) based on the four relative  
1245 kernel amplitudes (as shown in [Figure 3A-D](#)). Fitting was done as follows:  
1246 For each tested cone-combination (e.g. all cones, or R+U only, etc.) we  
1247 computed  $10^6$  possible combined tunings at random by summing the  
1248 respective reduced cone tuning functions ([Supplemental Figure 3C](#)) with  
1249 random scaling between -1 and 1 each. We then computed the linear  
1250 correlation coefficient between each AC-cluster's tuning function, and each  
1251 of the randomly generated combined cone-tunings, in each case choosing  
1252 cone-combination that gave the maximal correlation as the best fit. Finally,  
1253 for each best fit, we scaled all cone weights to minimise the residual  
1254 between the corresponding AC-cluster's tuning function and that of the  
1255 combined cone-tuning. Based on this strategy, the mean variance  
1256 explained for cone-combinations RGBU, RU, RGU, GU, respectively, were:  
1257 All long-On/Off clusters: 95.4%, 86.3%, 90.0%, 53.3%; All V-shaped  
1258 clusters: 84.0%, 81.4%, 84.9%, 55.6%; All opponent clusters: 86.8%,  
1259 63.2%, 83.1%, 71.8%.

1260  
1261 **Sorting ACs and BCs into spectral groups.** Using the amplitudes of the  
1262 four kernels, cluster means of ACs were sorted into one of the four spectral  
1263 groups. First, the AC clusters were divided into non-opponent ([Figure 3A-](#)  
1264 [C](#)) and opponent groups ([Figure 3D](#)). Next, For the non-opponent groups,  
1265 the AC clusters were sorted into the three following groups: Long-Off, with  
1266 the long-biased Off-response across all four spectral stimuli if  
1267  $abs(R+G) > abs(B+U) * 2$ ; Long-On, as Long-Off but for On-responses; V-  
1268 shaped:  $abs(R+U) > abs(G+B) * 2$ . The opponent group was further sorted  
1269 into RG/BU ( $C_{21,22}$ ) and RBU/G ( $C_{13,18,23,24}$ ) sub-groups based on the  
1270 relative signs of green vs. UV-responses.

1271 Kernel amplitudes of each BC terminals were sorted into 8 spectral groups.  
1272 First, all BCs that failed to exceed a minimum absolute amplitude of 10 SD  
1273 in at least one of the four kernels was counted as non-responsive. Next,  
1274 we divided the remaining BCs into non-opponent (groups 1-5) and  
1275 opponent types (groups 6-8) based on the relative signs of all four (R, G,  
1276 B, U) kernels. From here, the two sets of BCs were sorted further as  
1277 follows: *Non-opponent BCs*, in order: Long-biased if  
1278  $abs(R+G) > abs(B+U) * 2$ , Short-biased if  $abs(R+G) < abs(B+U)$ , Mid-biased if  
1279  $abs(G+B) > abs(R+U) * 2$ , V-shaped if  $abs(R+U) > abs(G+B) * 2$ , else: "Broad".  
1280 Opponent BCs; Short-opponent if  $(R+G > 0 \ \&\& \ U < 0) \ || \ (R+G < 0 \ \&\& \ U > 0)$ ,  
1281 Mid-opponent if  $(R > 0 \ \&\& \ B < 0) \ || \ R < 0 \ \&\& \ B > 0$ , Long-opponent if  $(R > 0 \ \&\& \ G < 0) \ || \ (R < 0 \ \&\& \ G > 0)$ . Finally, in rare cases where  $(R > 0 \ \&\& \ G < 0 \ \&\& \ U > 0) \ || \ (R < 0 \ \&\& \ G > 0 \ \&\& \ U < 0)$ , BCs were allocated as long-opponent if  $abs(R) > abs(U)$  but as short-opponent  $abs(R) < abs(U)$ .

1285 Note that despite the similar sorting procedure, ACs only fell into 4 groups  
1286 (Figure 3A-D) while BCs can be sorted into 8 (Figure 6B).

1287  
1288 **Response Synchronisation.** To determine the degree of response  
1289 synchronisation within each scan, we used the synchrony measurement  
1290 method described in Ref<sup>63</sup>, using the z-normalized fluorescence traces  
1291 from tetrachromatic noise stimulation of the wide-expressed syGCaMP8m  
1292 BC data as the input. We first evaluated  $F(t)$  across all the recorded  
1293 terminals within one field of view at a given time  $t$ :

$$F(t) = \frac{1}{N} \sum_{i=1}^N F_i(t).$$

1294  
1295 The variance of the time fluctuations of  $F(t)$  is

$$\sigma_F^2 = \langle [F(t)]^2 \rangle_t - [\langle F(t) \rangle_t]^2$$

1296 Where  $\langle \dots \rangle_t$  denotes the time-averaging over the session. For each  
1297 terminal  $F_i(t)$ , we used similar approach to calculate the time fluctuations

$$\sigma_{F_i}^2 = \langle [F_i(t)]^2 \rangle_t - [\langle F_i(t) \rangle_t]^2$$

1299 The synchrony measure,  $\chi(N)$ , for the scan filed is then calculated as  
1300

$$\chi(N) = \sqrt{\frac{\sigma_F^2}{\frac{1}{N} \sum_{i=1}^N \sigma_{F_i}^2}}$$

1301  
1302 The value of  $\chi(N)$  ranges between 0 and 1.  $\chi(N) = 1$  indicates that all  
1303 ROIs within a scan are perfectly synchronized.

1304  
1305 **Analysis of cone recordings.** To control for possible effects of our  
1306 pharmacological manipulation on outer retinal processing, we recorded  
1307 calcium responses from the synaptic output pedicles of the four types of  
1308 cones as described previously<sup>7</sup> under control conditions and again  
1309 following application of the GABA/glycine blocker cocktail, each time  
1310 assessing cones' responses to the spectral steps stimulus (Figure S4 C–  
1311 N). For each cone, response amplitudes per step were extracted as  
1312 described previously<sup>7</sup>, and tuning curves were computed by sign-inverting  
1313 response amplitudes (to compensate for the hyperpolarising light response  
1314 of vertebrate cones) and normalising each curve to a peak of 1.

## 1315 1316 QUANTIFICATION AND STATISTICAL ANALYSIS

1317 **Statistics.** No statistical methods were used to predetermine sample size.  
1318 Owing to the exploratory nature of our study, we did not use randomization  
1319 or blinding.

1320 Chi-squared tests were used for the following datasets: polarity and  
1321 kinetics based on white step stimulation for ACs (Figure 1G); BCs polarity  
1322 distribution before and after disinhibition with white steps (Figure 5A,B); BC  
1323 response types before and after disinhibition (Figure 5E,F, bar plots); BCs  
1324 polarity distribution before and after disinhibition with colour steps  
1325 (Supplemental Figure S5); Polarity distribution for paired BCs (Figure 7E);

1326 paired BCs polarity distribution before and after sham injection with white  
1327 steps (Figure S7 Extended H).

1328 Wilcoxon signed-rank tests were used for the following datasets:  
1329 comparison of population synchronicity (Supplemental Figure S4B); weight  
1330 distributions for the four kinetic components (Figure 5D); population  
1331 synchronicity in sham dataset (Supplemental Figure S7 Extended I); co-  
1332 variation of absolute response amplitudes changes (Figure 8F,G,  
1333 Supplemental Figure S8A-F).

1334 Wilcoxon rank sum tests were used for the following datasets: distribution  
1335 of kinetic component weights for ACs (Figure 1H); drug effect for four types  
1336 of cones (Supplemental Figure S4E,H,K,N); Distribution of kinetic  
1337 component weights for BCs (Figure 5E,F, distributions); Percentages of  
1338 ROIs per spectral category (Figure 6B).

1339 Two sample Kolmogorov–Smirnov tests were used for the following  
1340 datasets: Distribution of On and Off BC-terminals across the IPL based on  
1341 white steps (Figure 5C, D); Distribution of opponent terminals across the  
1342 IPL based on spectral kernels (Figure 6C, D).

1343

#### 1344 **SUPPLEMENTAL VIDEOS**

1345 **Supplemental Video 1 – related to Figure 4.** Example average-response  
1346 movie of a central (left) and peripheral scan region (right) during white chirp  
1347 stimulation (cf. Figure 4C,F), in the presence (bottom) and absence (top)  
1348 of inhibitory inputs from amacrine cells. To highlight increases  
1349 SyjGCaMP8m signal relative to baseline, the movie is centered around  
1350 each pixel's mean brightness immediately preceding the 100% white step.  
1351 4x Real time.

1352

1353 **Supplemental Video 2 – related to Figure 4.** As Supplemental Video 1,  
1354 but for colour-steps (cf. Figure 4D,G). The marker in the center indicates  
1355 the current stimulus played. 4x Real time. To highlight both increases and  
1356 decreases in the SyjGCaMP8m signal, the movie is centered around each  
1357 pixel's mean value across trials.

1358

1359

1360 EXTENDED DATA

1361

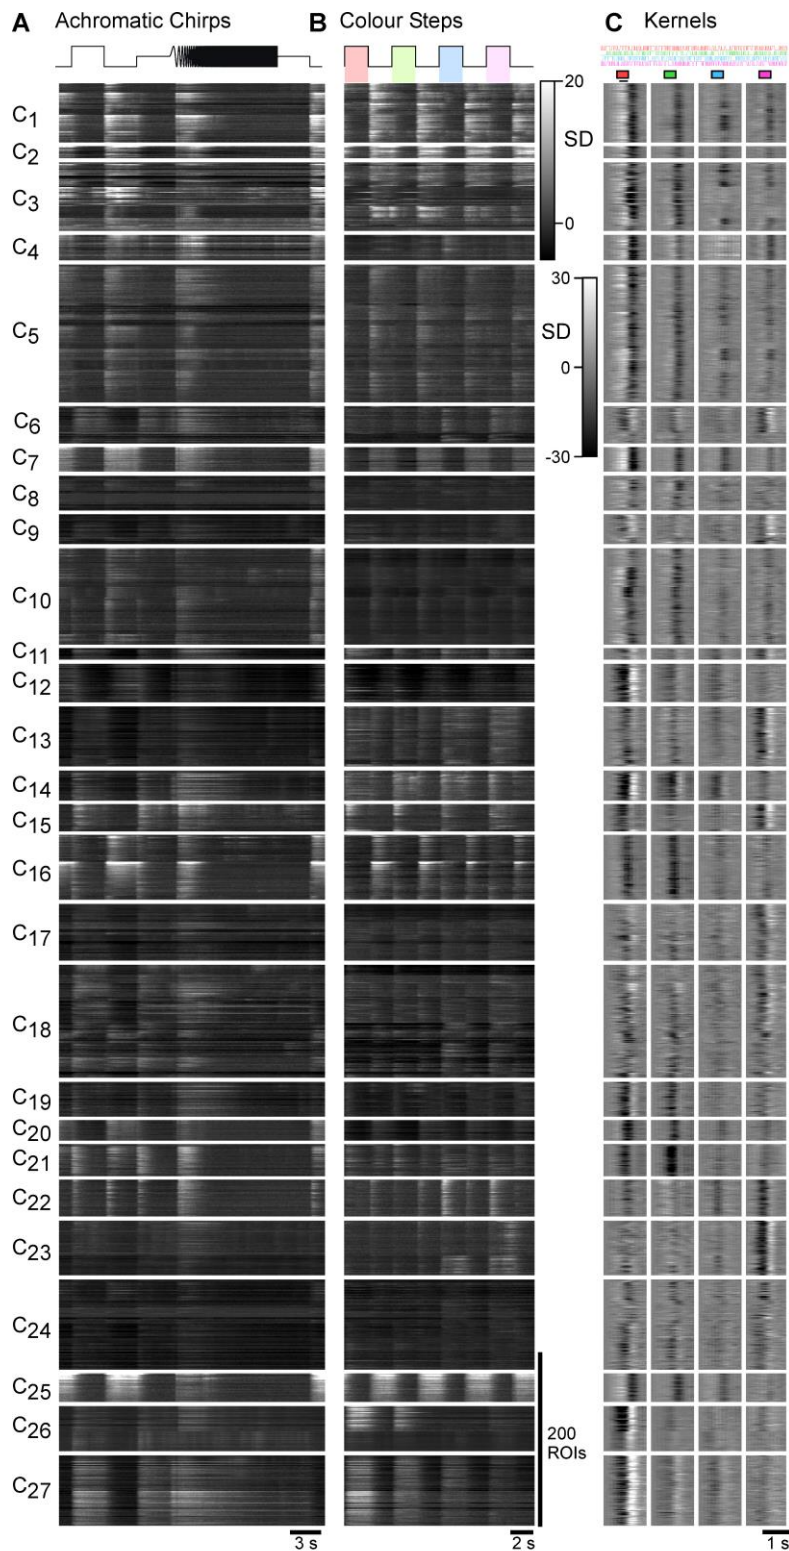

1362  
1363  
1364  
1365  
1366  
1367  
1368  
1369

**Supplemental Figure S2 extended 1 – related to Figure 2.** Detail of AC clusters, showing heatmaps of the full dataset leading to the cluster means shown in Supplemental Figure S2. Shown are the chirps (A), colour-steps (B), and kernels (C).

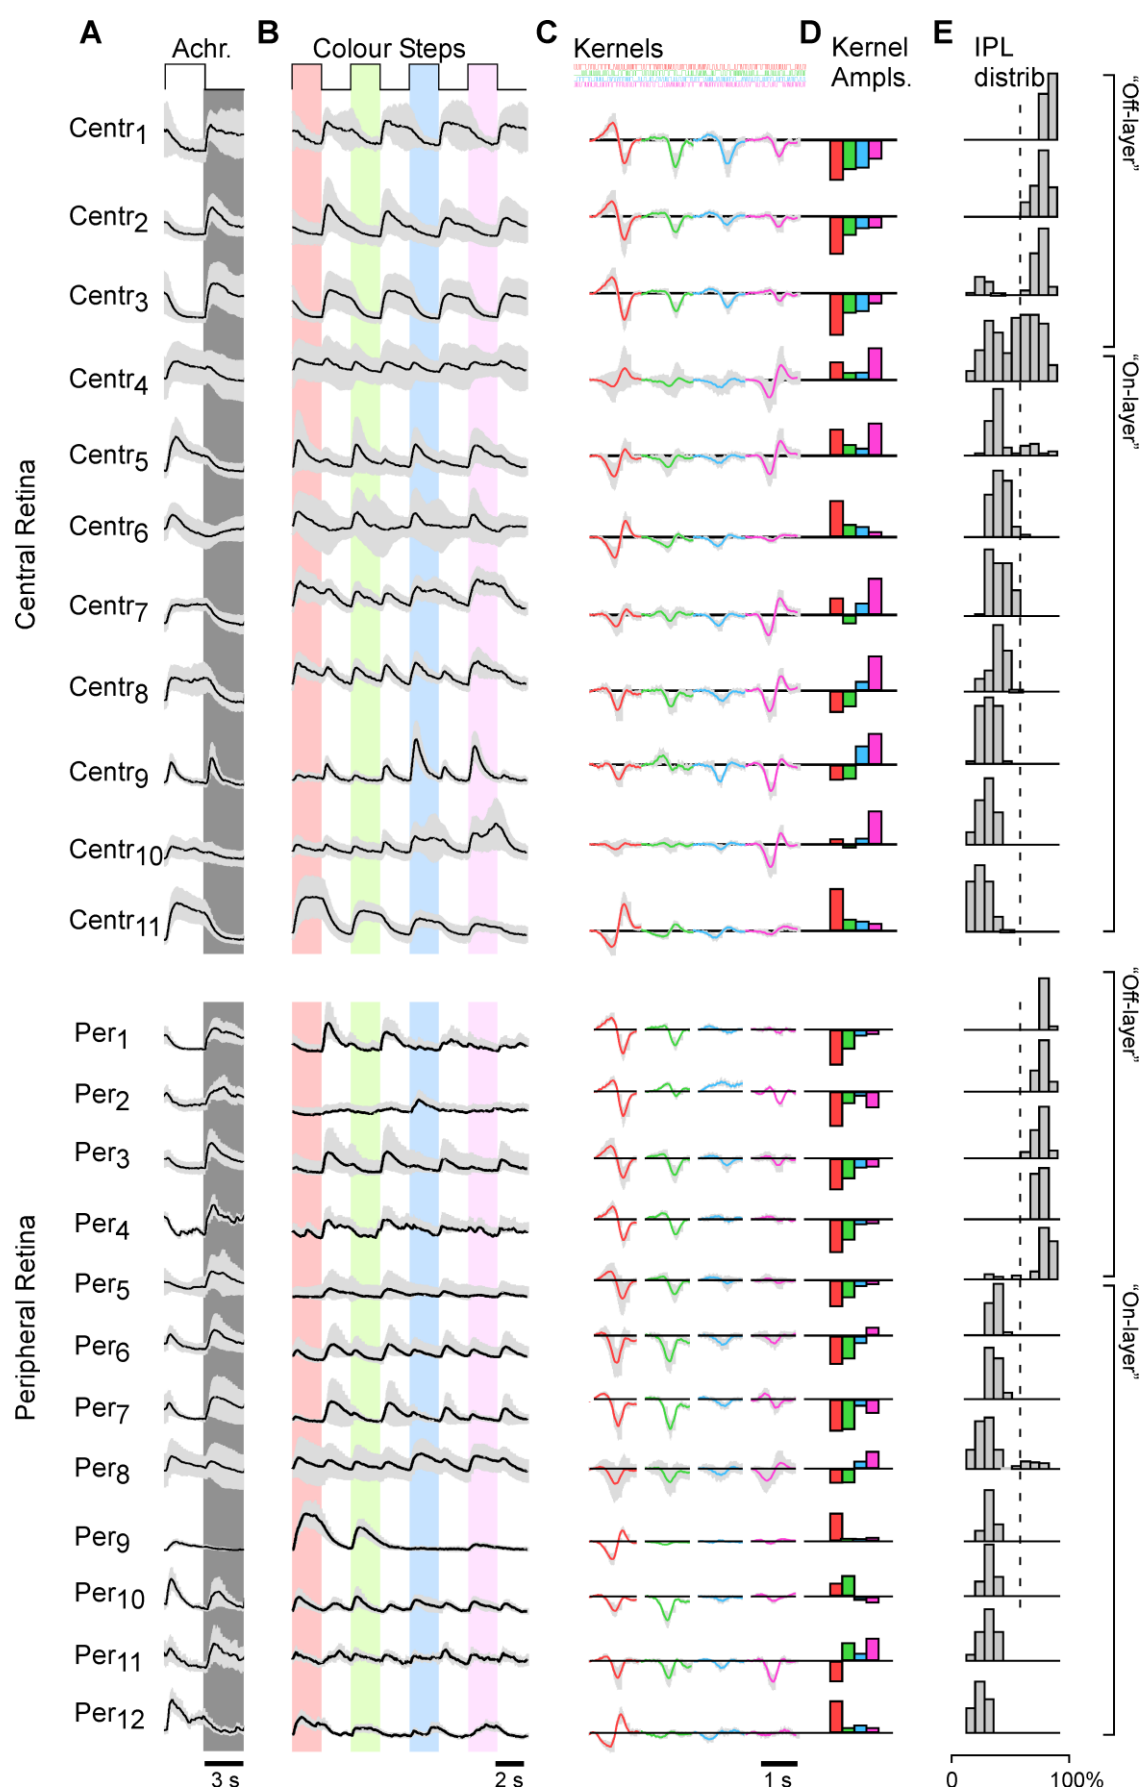

1370  
1371  
1372  
1373

**Supplemental Figure S2 extended 2 – related to Figure 2.** Result of alternative clustering, where ROIs from the central and peripheral retina were clustered independently.

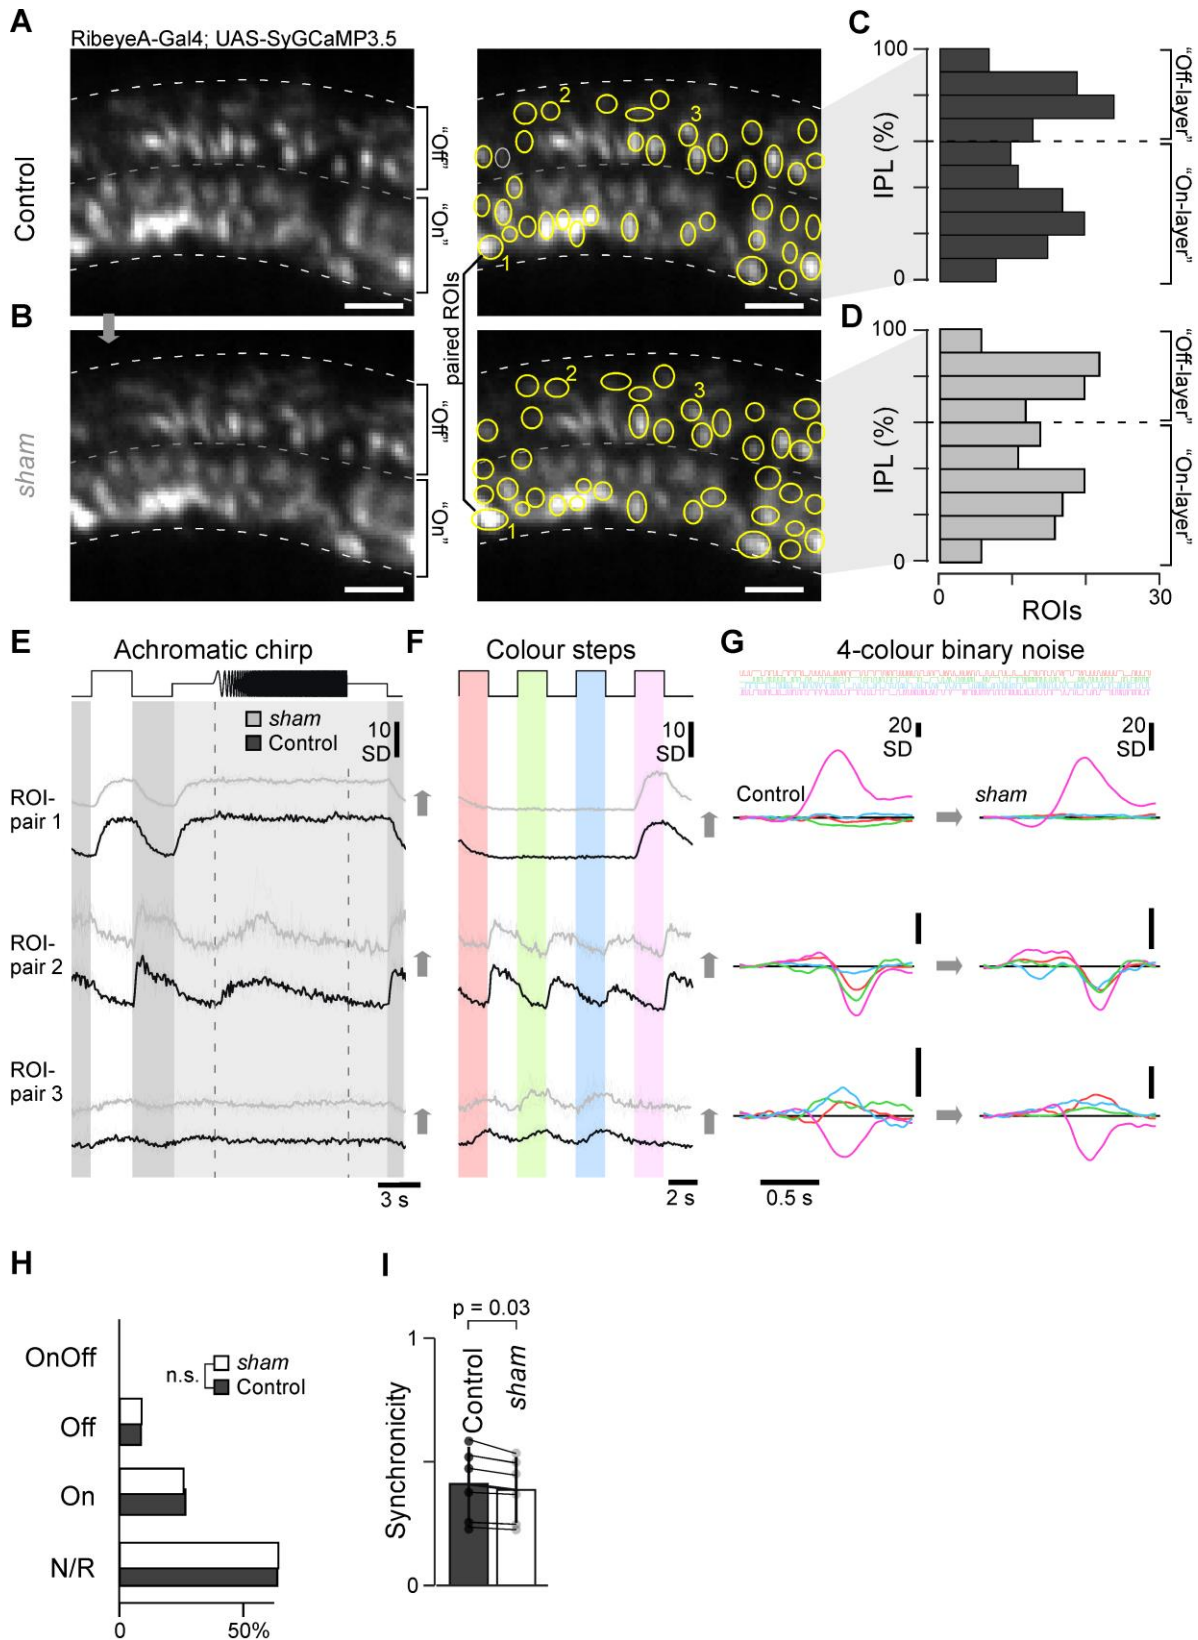

1374  
1375  
1376  
1377  
1378  
1379  
1380  
1381  
1382

**Supplemental Figure S7 Extended – related for Figure 7**

**A-G**, As **Supplemental Figure S7A-D** and **Figure 7A-C**, respectively, but here shown for sham injection dataset. **H**, No change in response allocation based on the white step responses in the sham dataset before (dark grey) and after sham injection (white). Chi-squared test,  $p > 0.05$ . **I**, No change in population synchronicity in sham dataset. Wilcoxon Signed-Rank test:  $p = 0.03$ . (cf. **Supplemental Figure S4B**).



1383 **REFERENCES**

- 1384 1. Land, M.F., and Nilsson, D.-E. (2012). *Animal Eyes* (Oxford University Press).
- 1385 2. Sterling, P., and Laughlin, S. (2015). *Principles of neural design* (The MIT Press).
- 1386 3. Wässle, H. (2004). Parallel processing in the mammalian retina. *Nat. Rev. Neurosci.* 5,  
1387 747–57.
- 1388 4. Baden, T., Euler, T., and Berens, P. (2020). Understanding the retinal basis of vision  
1389 across species. *Nat. Rev. Neurosci.* 21.
- 1390 5. Baden, T. (2021). Circuit-mechanisms for colour vision in zebrafish. *Curr. Biol.* 31,  
1391 PR807-R80.
- 1392 6. Gollisch, T., and Meister, M. (2009). Review Eye Smarter than Scientists Believed :  
1393 Neural Computations in Circuits of the Retina. *Neuron* 65, 150–164.
- 1394 7. Yoshimatsu, T., Bartel, P., Schröder, C., Janiak, F.K., St-Pierre, F., Berens, P., and  
1395 Baden, T. (2021). Ancestral circuits for vertebrate color vision emerge at the first retinal  
1396 synapse. *Sci. Adv.* 7, 6815–6828.
- 1397 8. Simoncelli, E.P., and Olshausen, B.A. (2001). Natural image statistics and neural  
1398 representation. *Annu Rev Neurosci* 24, 1193–1216.
- 1399 9. Buchsbaum, G., and Gottschalk, A. (1983). Trichromacy, opponent colours coding and  
1400 optimum colour information transmission in the retina. *Proc. R. Soc. Lond. B. Biol. Sci.*  
1401 220, 89–113.
- 1402 10. Barlow, H.B.H. (1961). Possible principles underlying the transformation of sensory  
1403 messages. In *Sensory Communication*, pp. 217–234.
- 1404 11. Ramirez, L., and Dickman, R. (2022). Data-driven models of optimal chromatic coding in  
1405 the outer retina. *bioRxiv*, 2022.02.07.479405.
- 1406 12. Li, Y.N., Tsujimura, T., Kawamura, S., and Dowling, J.E. (2012). Bipolar cell-  
1407 photoreceptor connectivity in the zebrafish (*Danio rerio*) retina. *J. Comp. Neurol.* 520,  
1408 3786–3802.
- 1409 13. Franke, K., Berens, P., Schubert, T., Bethge, M., Euler, T., and Baden, T. (2017).  
1410 Inhibition decorrelates visual feature representations in the inner retina. *Nature* 542,  
1411 439–444.
- 1412 14. Franke, K., and Baden, T. (2017). General features of inhibition in the inner retina. *J.*  
1413 *Physiol.* 595, 5507–5515.
- 1414 15. Diamond, J.S. (2017). Inhibitory Interneurons in the Retina: Types, Circuitry, and  
1415 Function. *Annu. Rev. Vis. Sci.* 3, 1–24.
- 1416 16. Moya-Díaz, J., James, B., Esposti, F., Johnston, J., and Lagnado, L. (2021). Diurnal  
1417 modulation of multivesicular release controls the efficiency of information transmission  
1418 at a sensory synapse. *bioRxiv*, 2021.09.12.459944.
- 1419 17. Jazdzinsky, P.D., and Baccus, S.A. (2013). Transformation of Visual Signals by Inhibitory  
1420 Interneurons in Retinal Circuits. *Annu. Rev. Neurosci.* 36, 403–428.
- 1421 18. Bartel, P., Yoshimatsu, T., Janiak, F.K., and Baden, T. (2021). Spectral inference  
1422 reveals principal cone-integration rules of the zebrafish inner retina. *Curr. Biol.* 0.
- 1423 19. Zimmermann, M.J.Y., Nevala, N.E., Yoshimatsu, T., Osorio, D., Nilsson, D.-E., Berens,  
1424 P., and Baden, T. (2018). Zebrafish Differentially Process Color across Visual Space to  
1425 Match Natural Scenes. *Curr. Biol.* 28, 2018-2032.e5.
- 1426 20. Masland, R.H. (2012). The tasks of amacrine cells. *Vis Neurosci* 29, 3–9.
- 1427 21. MacNeil, M.A., and Masland, R.H. (1998). Extreme diversity among amacrine cells:  
1428 Implications for function. *Neuron* 20, 971–982.
- 1429 22. Yan, W., Laboulaye, M.A., Tran, N.M., Whitney, I.E., Benhar, I., and Sanes, J.R. (2020).  
1430 Mouse Retinal Cell Atlas: Molecular Identification of over Sixty Amacrine Cell Types. *J.*

- 1431 Neurosci. *40*, 5177–5195.
- 1432 23. Tanimoto, N., Sothilingam, V., Euler, T., Ruth, P., Seeliger, M.W., and Schubert, T.  
1433 (2012). BK channels mediate pathway-specific modulation of visual signals in the in vivo  
1434 mouse retina. *J. Neurosci.* *32*, 4861–6.
- 1435 24. Grimes, W.N., Zhang, J., Graydon, C.W., Kachar, B., and Diamond, J.S. (2010). Retinal  
1436 parallel processors: more than 100 independent microcircuits operate within a single  
1437 interneuron. *Neuron* *65*, 873–85.
- 1438 25. Nikolaev, A., Leung, K.-M., Odermatt, B., and Lagnado, L. (2013). Synaptic mechanisms  
1439 of adaptation and sensitization in the retina. *Nat. Neurosci.* *16*, 934–41.
- 1440 26. Johnston, J., Seibel, S.-H., Darnet, L.S.A., Renninger, S., Orger, M., and Lagnado, L.  
1441 (2019). A Retinal Circuit Generating a Dynamic Predictive Code for Oriented Features.  
1442 *Neuron* *102*, 1211-1222.e3.
- 1443 27. Torvund, M.M., Ma, T.S., Connaughton, V.P., Ono, F., and Nelson, R.F. (2017). Cone  
1444 signals in monostratified and bistratified amacrine cells of adult zebrafish retina. *J.*  
1445 *Comp. Neurol.* *525*, 1532–1557.
- 1446 28. Patterson, S.S., Kuchenbecker, J.A., Anderson, J.R., Neitz, M., and Neitz, J. (2020). A  
1447 Color Vision Circuit for Non-Image-Forming Vision in the Primate Retina. *Curr. Biol.* *30*,  
1448 1269-1274.e2.
- 1449 29. Lebedev, D.S., and Marshak, D.W. (2007). Amacrine cell contributions to red-green  
1450 color opponency in central primate retina: A model study. *Vis. Neurosci.* *24*, 535–547.
- 1451 30. Baden, T., and Osorio, D. (2019). The Retinal Basis of Vertebrate Color Vision. *Annu.*  
1452 *Rev. Vis. Sci.* *5*, 177–200.
- 1453 31. Jusuf, P.R., and Harris, W.A. (2009). Ptf1a is expressed transiently in all types of  
1454 amacrine cells in the embryonic zebrafish retina. *Neural Dev.*
- 1455 32. Bartel, P., Janiak, F.K., Osorio, D., and Baden, T. (2021). Colourfulness as a possible  
1456 measure of object proximity in the larval zebrafish brain. *Curr. Biol.* *31*, R235–R236.
- 1457 33. Zhou, M., Bear, J., Roberts, P.A., Janiak, F.K., Semmelhack, J., Yoshimatsu, T., and  
1458 Baden, T. (2020). Zebrafish Retinal Ganglion Cells Asymmetrically Encode Spectral and  
1459 Temporal Information across Visual Space. *Curr. Biol.* *30*, 2927-2942.e7.
- 1460 34. Yoshimatsu, T., Schröder, C., Nevala, N.E., Berens, P., and Baden, T. (2020). Fovea-  
1461 like Photoreceptor Specializations Underlie Single UV Cone Driven Prey-Capture  
1462 Behavior in Zebrafish. *Neuron* *107*, 320-337.e6.
- 1463 35. Robles, E., Laurell, E., and Baier, H. (2014). The Retinal Projectome Reveals Brain-  
1464 Area-Specific Visual Representations Generated by Ganglion Cell Diversity. *Curr. Biol.*  
1465 *24*, 2085–2096.
- 1466 36. Semmelhack, J.L., Donovan, J.C., Thiele, T.R., Kuehn, E., Laurell, E., and Baier, H.  
1467 (2014). A dedicated visual pathway for prey detection in larval zebrafish. *Elife* *3*,  
1468 e04878.
- 1469 37. Mearns, D.S., Donovan, J.C., Fernandes, A.M., Semmelhack, J.L., and Baier, H. (2020).  
1470 Deconstructing Hunting Behavior Reveals a Tightly Coupled Stimulus-Response Loop.  
1471 *Curr. Biol.* *30*, 54-69.e9.
- 1472 38. Bianco, I.H., Kampff, A.R., and Engert, F. (2011). Prey Capture Behavior Evoked by  
1473 Simple Visual Stimuli in Larval Zebrafish. *Front. Syst. Neurosci.* *5*, 1–12.
- 1474 39. Schmitt, E.A., and Dowling, J.E. (1999). Early retinal development in the zebrafish,  
1475 *Danio rerio*: light and electron microscopic analyses. *404*, 515–36.
- 1476 40. Kölsch, Y., Hahn, J., Sappington, A., Stemmer, M., Fernandes, A.M., Helmbrecht, T.O.,  
1477 Lele, S., Butrus, S., Laurell, E., Arnold-Ammer, I., et al. (2020). Molecular classification  
1478 of zebrafish retinal ganglion cells links genes to cell types to behavior. *Neuron* *109*, 645-

- 1479 662.e9.
- 1480 41. Schröder, C., Oesterle, J., Berens, P., Yoshimatsu, T., and Baden, T. (2021). Distinct  
1481 synaptic transfer functions in same-type photoreceptors. *Elife* 10.
- 1482 42. Dreosti, E., Odermatt, B., Dorostkar, M.M., and Lagnado, L. (2009). A genetically  
1483 encoded reporter of synaptic activity in vivo. *Nat. Methods* 6, 883–9.
- 1484 43. Zimmermann, M.J.Y., Maia Chagas, A., Bartel, P., Pop, S., Prieto-Godino, L.L., and  
1485 Baden, T. (2020). LED Zappelin': An open source LED controller for arbitrary spectrum  
1486 visual stimulation and optogenetics during 2-photon imaging. *HardwareX*.
- 1487 44. Zhang, Y., Rózsa, M., Liang, Y., Bushey, D., Wei, Z., Zheng, J., Reep, D., Broussard,  
1488 G.J., Tsang, A., Tsegaye, G., et al. (2021). Fast and sensitive GCaMP calcium  
1489 indicators for imaging neural populations. *bioRxiv*, 2021.11.08.467793.
- 1490 45. Rosa, J.M., Ruehle, S., Ding, H., and Lagnado, L. (2016). Crossover Inhibition  
1491 Generates Sustained Visual Responses in the Inner Retina. *Neuron* 90, 308–319.
- 1492 46. Nirenberg, S., and Meister, M. (1997). The Light Response of Retinal Ganglion Cells is  
1493 Truncated by a Displaced Amacrine Circuit. *Neuron* 18, 637–650.
- 1494 47. Fornetto, C., Tiso, N., Pavone, F.S., and Vanzi, F. (2020). Colored visual stimuli evoke  
1495 spectrally tuned neuronal responses across the central nervous system of zebrafish  
1496 larvae. *BMC Biol.* 18, 1–17.
- 1497 48. Guggiana Nilo, D.A., Riegler, C., Hübener, M., and Engert, F. (2021). Distributed  
1498 chromatic processing at the interface between retina and brain in the larval zebrafish.  
1499 *Curr. Biol.*, S0960-9822(21)00153–6.
- 1500 49. Arriza, J.L., Eliasof, S., Kavanaugh, M.P., and Amara, S.G. (1997). Excitatory Amino  
1501 Acid Transporter 5, A Retinal Glutamate Transporter Coupled To a Chloride  
1502 Conductance. *Proc.Natl.Acad.Sci.* 94, 4155–4160.
- 1503 50. Divito, C.B., and Underhill, S.M. (2014). Excitatory Amino Acid Transporters: Roles in  
1504 Glutamatergic Neurotransmission. *Neurochem. Int.* 0, 172.
- 1505 51. Packer, O.S., Verweij, J., Li, P.H., Schnapf, J.L., and Dacey, D.M. (2010). Blue-yellow  
1506 opponency in primate S cone photoreceptors. *J. Neurosci.* 30, 568–572.
- 1507 52. Behrens, C., Yadav, S.C., Korympidou, M.M., Zhang, Y., Haverkamp, S., Irsen, S.,  
1508 Schaedler, A., Lu, X., Liu, Z., Lause, J., et al. (2021). Retinal horizontal cells use  
1509 different synaptic sites for global feedforward and local feedback signaling. *Curr. Biol.*
- 1510 53. Haverkamp, S., Wässle, H., and Wässle, H. (2004). Characterization of an amacrine cell  
1511 type of the mammalian retina immunoreactive for vesicular glutamate transporter 3. *J.*  
1512 *Comp. Neurol.* 468, 251–63.
- 1513 54. Kim, T., Soto, F., and Kerschensteiner, D. (2015). An excitatory amacrine cell detects  
1514 object motion and provides feature-selective input to ganglion cells in the mouse retina.  
1515 *Elife* 4, e08025.
- 1516 55. Lee, S., Zhang, Y., Chen, M., Zhou, Z.J.J.Z.J., Amthor, F.R., Takahashi, E.S., Oyster,  
1517 C.W., Chiao, C.C., Masland, R.H., Fremeau, R.T., et al. (2016). Segregated Glycine-  
1518 Glutamate Co-transmission from vGluT3 Amacrine Cells to Contrast-Suppressed and  
1519 Contrast-Enhanced Retinal Circuits. *Neuron* 90, 27–34.
- 1520 56. Famiglietti (1983). "Starburst" amacrine cells and cholinergic neurons: mirror-symmetric  
1521 on and off amacrine cells of rabbit retina. *Brain Res* 261, 138–144.
- 1522 57. Lee, S., Kim, K., and Zhou, Z.J. (2010). Role of ACh-GABA cotransmission in detecting  
1523 image motion and motion direction. *Neuron* 68, 1159–72.
- 1524 58. Euler, T., and Baden, T. (2016). Computational neuroscience: Species-specific motion  
1525 detectors. *Nature* 535.
- 1526 59. Nilsson, D.-E. (2021). The Diversity of Eyes and Vision. *Annu. Rev. Vis. Sci.* 7.

- 1527 60. Maximov, V. V. (2000). Environmental factors which may have led to the appearance of  
1528 colour vision. *Philos. Trans. R. Soc. B Biol. Sci.* 355, 1239–1242.
- 1529 61. Lamb, T.D., Collin, S.P., Pugh, E.N., and Jr (2007). Evolution of the vertebrate eye:  
1530 Opsins, photoreceptors, retina and eye cup. *Nat. Rev. Neurosci.* 8, 960–976.
- 1531 62. Dreosti, E., and Lagnado, L. (2011). Optical reporters of synaptic activity in neural  
1532 circuits. *Exp. Physiol.* 96, 4–12.
- 1533 63. Golomb, D., and Hansel, D. (2000). The number of synaptic inputs and the synchrony of  
1534 large, sparse neuronal networks. *Neural Comput.* 12, 1095–1139.
- 1535 64. Euler, T., Hausselt, S.E., Margolis, D.J., Breuninger, T., Castell, X., Detwiler, P.B., and  
1536 Denk, W. (2009). Eyecup scope--optical recordings of light stimulus-evoked  
1537 fluorescence signals in the retina. *Pflugers Arch.* 457, 1393–414.
- 1538 65. Euler, T., Franke, K., and Baden, T. (2019). Studying a light sensor with light:  
1539 Multiphoton imaging in the retina. In *Neuromethods*.
- 1540 66. Baden, T., Berens, P., Franke, K., Roman-Roson, M., Bethge, M., and Euler (2016). The  
1541 functional diversity of mouse retinal ganglion cells. *Nature*, 1–21.
- 1542 67. Dorostkar, M.M., Dreosti, E., Odermatt, B., and Lagnado, L. (2010). Computational  
1543 processing of optical measurements of neuronal and synaptic activity in networks. *J.*  
1544 *Neurosci. Methods* 188, 141–50.
- 1545
- 1546
